# Supplementary material for: Catalyst-free racemic and H2O/CPA-catalyzed asymmetric regio-reversed domino processes of triketone enones with azlactones
Source: Royal Society of Chemistry journal article supplement (doi:10.1039/d3gc01445b), 2023-01-01
Supplement: d3gc01445b1.pdf [file d3gc01445b1.pdf]

# Catalyst-free racemic and H<sub>2</sub>O/CPA-catalyzed asymmetric regio-reversed domino processes of triketone enones with azlactones

Yun-Dong Fu,<sup>a</sup> Xiang Gao,<sup>a</sup> Shi-Kun Jia,<sup>a</sup> Xiao Xiao,<sup>b</sup> Min-Can Wang,<sup>a</sup> Lihua Huang<sup>\*,a</sup>  
and Guang-Jian Mei<sup>\*,a</sup>

<sup>a</sup> Green Catalysis Center, and College of Chemistry, Zhengzhou University, Zhengzhou 450001, China. E-mail: [hlh606@zzu.edu.cn](mailto:hlh606@zzu.edu.cn); [meigj@zzu.edu.cn](mailto:meigj@zzu.edu.cn).

<sup>b</sup> Institute of Pharmaceutical Science and Technology, Zhejiang University of Technology, Hangzhou 310014, People's Republic of China.

## Supporting Information

### TABLE OF CONTENTS

|                                                                |           |
|----------------------------------------------------------------|-----------|
| <b>1. General Methods</b> .....                                | <b>2</b>  |
| <b>2. Representative Procedures</b> .....                      | <b>3</b>  |
| <b>3. Characterization of Products</b> .....                   | <b>7</b>  |
| <b>4. Chemical kinetics studies</b> .....                      | <b>28</b> |
| <b>5. X-ray single crystal data for compounds (-)-3l</b> ..... | <b>31</b> |
| <b>6. NMR Spectra</b> .....                                    | <b>33</b> |
| <b>7. HPLC spectra</b> .....                                   | <b>64</b> |
| <b>8. References</b> .....                                     | <b>92</b> |

## 1. General Methods

Unless otherwise specified, all reactions were conducted under an inert atmosphere and anhydrous conditions. All the solvents were purified according to the standard procedures. All chemicals which are commercially available were employed without further purification. Thin-layer chromatography (TLC) was performed on silica gel plates (60F-254) using UV-light (254 nm). Flash chromatography was conducted on silica gel (200–300 mesh).  $^1\text{H}$  and  $^{13}\text{C}$  NMR spectra were recorded at ambient temperature in  $\text{CDCl}_3$  on a 400 MHz NMR spectrometer. Chemical shifts were reported in parts per million (ppm). The data are reported as follows: for  $^1\text{H}$  NMR, chemical shift in ppm from tetramethylsilane with the solvent as internal standard ( $\text{CDCl}_3$   $\delta$  7.26 ppm), multiplicity (s = singlet, d = doublet, t = triplet, q = quartet, m = multiplet or overlap of non-equivalent resonances), integration; for  $^{13}\text{C}$  NMR, chemical shift in ppm from tetramethylsilane with the solvent as internal indicator ( $\text{CDCl}_3$   $\delta$  77.1 ppm), multiplicity with respect to protons. All high-resolution mass spectra were obtained on a Q-TOF Micro LC/MS System ESI spectrometer to be given in m/z. Enantiomeric excesses values were determined with HPLC (chiral column; Mobile phase hexane/i-PrOH). Trione alkenes **1** were synthesized according to modified literature-reported procedures<sup>1</sup>; Azlactone **2** were either employed directly from commercial sources or prepared according to the literature<sup>2-3</sup>.

## 2. Representative Procedures

**Table S1.** Optimization of the reaction conditions<sup>a</sup>

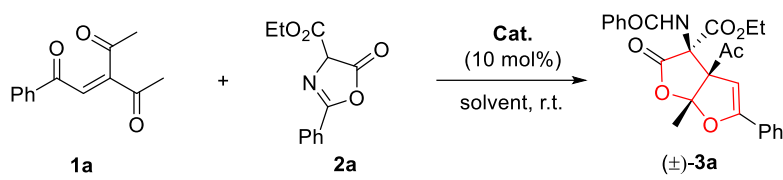

| entry | Cat.                           | solvent                         | yield (%) <sup>b</sup> | dr <sup>c</sup> |
|-------|--------------------------------|---------------------------------|------------------------|-----------------|
| 1     | AcOH                           | CH <sub>2</sub> Cl <sub>2</sub> | 81                     | >20:1           |
| 2     | PhCO <sub>2</sub> H            | CH <sub>2</sub> Cl <sub>2</sub> | 73                     | >20:1           |
| 3     | H <sub>3</sub> PO <sub>4</sub> | CH <sub>2</sub> Cl <sub>2</sub> | 84                     | >20:1           |
| 4     | TFA                            | CH <sub>2</sub> Cl <sub>2</sub> | 78                     | >20:1           |
| 5     | TsOH                           | CH <sub>2</sub> Cl <sub>2</sub> | 64                     | >20:1           |
| 6     | -                              | CH <sub>2</sub> Cl <sub>2</sub> | 89                     | >20:1           |
| 7     | -                              | toluene                         | 82                     | >20:1           |
| 8     | -                              | CH <sub>3</sub> CN              | 78                     | >20:1           |
| 9     | -                              | THF                             | 43                     | >20:1           |

a) Reaction conditions: **1a** (0.05 mmol), **2a** (0.05 mmol.), **Cat.** (10 mol%), solvent (1 mL), and at room temperature (r.t.) for 24 h. b) Isolated yields. c) Determined by <sup>1</sup>H NMR.

### General Procedures for the synthesis of target products

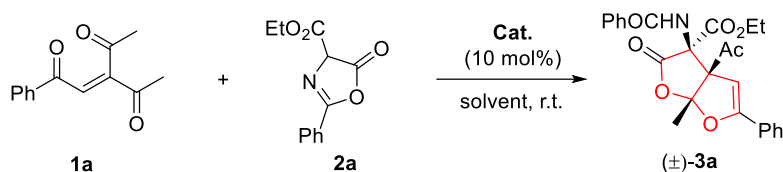

Trione alkenes **1** (0.15 mmol) and azlactone **2** (0.15 mmol) was dissolved in DCM (3 ml), rac-PA (10 mol%) was added. The reaction mixture was stirred for 24 h at room temperature. The solvents were removed in vacuo and the crude product was separated by flash column chromatography on silica gel (petroleum ether/ethyl acetate 5:1–3:1) to afford colorless solid (±)-**3a**.

**Table S2.** Optimization of the catalytic asymmetric reaction conditions.<sup>a</sup>

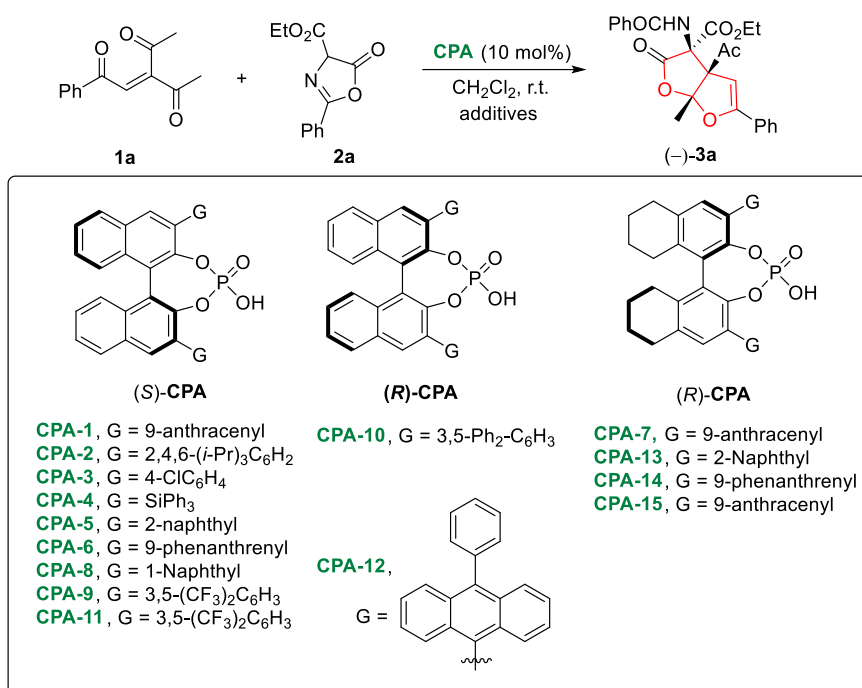

| Entry | Solvent           | Cat.          | T(h) | t(°C) | Y(%) <sup>b</sup> | ee% <sup>c</sup> | dr <sup>c</sup> |
|-------|-------------------|---------------|------|-------|-------------------|------------------|-----------------|
| 1     | DCM               | <b>CPA-2</b>  | 24   | r.t   | 75                | -24              | >20:1           |
| 2     | DCM               | <b>CPA-3</b>  | 24   | r.t   | 82                | -30              | >20:1           |
| 3     | DCM               | <b>CPA-1</b>  | 24   | r.t   | 82                | -40              | >20:1           |
| 4     | DCM               | <b>CPA-8</b>  | 24   | r.t   | 75                | -54              | >20:1           |
| 5     | DCM               | <b>CPA-4</b>  | 24   | r.t   | 82                | 0                | >20:1           |
| 6     | THF               | <b>CPA-8</b>  | 24   | r.t   | 45                | -24              | >20:1           |
| 7     | MeCN              | <b>CPA-8</b>  | 24   | r.t   | 82                | -20              | >20:1           |
| 8     | Toluene           | <b>CPA-8</b>  | 24   | r.t   | 80                | -22              | >20:1           |
| 9     | DCE               | <b>CPA-8</b>  | 24   | r.t   | 65                | -44              | >20:1           |
| 10    | CHCl <sub>3</sub> | <b>CPA-8</b>  | 24   | r.t   | Trace             | -                | >20:1           |
| 11    | CCl <sub>4</sub>  | <b>CPA-8</b>  | 24   | r.t   | 45                | -14              | >20:1           |
| 12    | DCM               | <b>CPA-9</b>  | 24   | r.t   | 63                | -64              | >20:1           |
| 13    | DCM               | <b>CPA-10</b> | 24   | r.t   | 75                | 34               | >20:1           |
| 14    | DCM               | <b>CPA-5</b>  | 24   | r.t   | 80                | -44              | >20:1           |
| 15    | DCM               | <b>CPA-11</b> | 24   | r.t   | 75                | 16               | >20:1           |
| 16    | DCM               | <b>CPA-6</b>  | 24   | r.t   | 75                | -64              | >20:1           |

|    |     |               |    |     |    |     |       |
|----|-----|---------------|----|-----|----|-----|-------|
| 17 | DCM | <b>CPA-12</b> | 24 | r.t | 78 | -72 | >20:1 |
| 18 | DCM | <b>CPA-13</b> | 24 | r.t | 80 | 40  | >20:1 |
| 19 | DCM | <b>CPA-14</b> | 24 | r.t | 76 | 72  | >20:1 |
| 20 | DCM | <b>CPA-15</b> | 24 | r.t | 82 | 50  | >20:1 |
| 21 | DCM | <b>CPA-7</b>  | 24 | r.t | 81 | 74  | >20:1 |

a) Reaction conditions: **1a** (0.05 mmol), **2a** (0.05 mmol.), **Cat.** (10 mol%), solvent and at room temperature (r.t.) for 24 h. b) Isolated yields. c) Determined by chiral HPLC analysis.

**Table S3.** Catalyst-loading screening.<sup>a</sup>

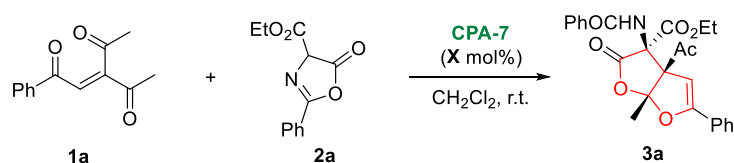

| Entry | Solvent | X  | Concentration | Y(%) <sup>b</sup> | ee% <sup>c</sup> | dr <sup>c</sup> |
|-------|---------|----|---------------|-------------------|------------------|-----------------|
| 1     | DCM     | 15 | 0.0017M       | 71                | 90               | >20:1           |
| 2     | DCM     | 10 | 0.0017M       | 70                | 90               | >20:1           |
| 3     | DCM     | 8  | 0.0017M       | 68                | 81               | >20:1           |
| 4     | DCM     | 6  | 0.0017M       | 68                | 52               | >20:1           |
| 5     | DCM     | 4  | 0.0017M       | 66                | 43               | >20:1           |

a) Reaction conditions: **1a** (0.15 mmol), **2a** (0.15 mmol), **CPA-7** (X mol%), solvent and at room temperature (r.t.) for 24 h. b) Isolated yields. c) Determined by chiral HPLC analysis.

**Table S4.** Additive screening.<sup>a</sup>

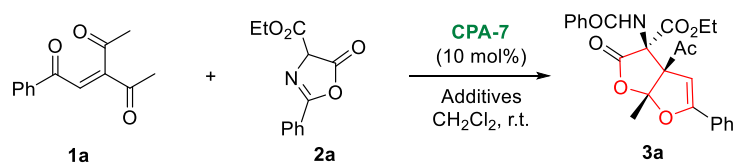

| Entry | Additive                    | Concentration | Y(%) <sup>b</sup> | ee% <sup>c</sup> | dr <sup>c</sup> |
|-------|-----------------------------|---------------|-------------------|------------------|-----------------|
| 1     | -                           | 0.005M        | 81                | 74               | >20:1           |
| 2     | H <sub>2</sub> O (0.5 mol%) | 0.005M        | 80                | 80               | >20:1           |
| 3     | H <sub>2</sub> O (1 mol%)   | 0.005M        | 73                | 86               | >20:1           |
| 4     | H <sub>2</sub> O (2 mol%)   | 0.005M        | 72                | 86               | >20:1           |
| 5     | H <sub>2</sub> O (4 mol%)   | 0.005M        | 70                | 86               | >20:1           |
| 6     | H <sub>2</sub> O (2 mol%)   | 0.0025M       | 75                | 86               | >20:1           |

|    |                           |         |    |    |       |
|----|---------------------------|---------|----|----|-------|
| 7  | H <sub>2</sub> O (2 mol%) | 0.0017M | 70 | 90 | >20:1 |
| 8  | H <sub>2</sub> O (2 mol%) | 0.0013M | 65 | 90 | >20:1 |
| 9  | H <sub>2</sub> O (2 mol%) | 0.0008M | 52 | 88 | >20:1 |
| 10 | H <sub>2</sub> O (2 mol%) | 0.0006M | 45 | 84 | >20:1 |

a) Reaction conditions: **1a** (0.05 mmol), **2a** (0.05 mmol.), **CPA-7** (10 mol%), CH<sub>2</sub>Cl<sub>2</sub> (10 mL) at room temperature (r.t.) for 24 h. b) Isolated yields. c) Determined by chiral HPLC analysis.

General Procedure for the catalytic asymmetric synthesis of target products

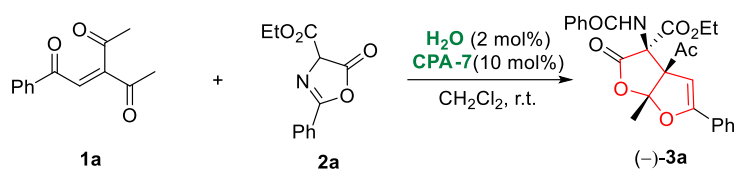

Trione alkenes **1a** (0.15 mmol), H<sub>2</sub>O (2 mol%) and **CPA-7** (10 mol%) was dissolved in DCM (88 ml), azlactone **2a** (0.15 mmol) was added in 5 minutes. The reaction mixture was stirred for 24 h at room temperature. The solvents were removed in vacuo and the crude product was separated by flash column chromatography on silica gel (petroleum ether/ethyl acetate 5:1–3:1) to afford colorless solid (-)-**3a**. Then recrystallization of the target products were conducted in EA/PE.

### 3. Characterization of Products

Ethyl 3a-acetyl-3-benzamido-6a-methyl-2-oxo-5-phenyl-2,3,3a,6a-tetrahydrofuro

[2,3-b]furan-3-carboxylate ( $\pm$ )-3a:

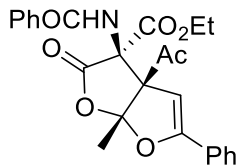

Colorless solid; 89% isolated yield = 60.02 mg; m.p. 120.9-121.8°C;  $^1\text{H}$  NMR (400 MHz,  $\text{CDCl}_3$ )  $\delta$  7.85 – 7.73 (m, 2H), 7.68 – 7.60 (m, 2H), 7.55 (t,  $J = 7.4$  Hz, 1H), 7.46 (t,  $J = 7.6$  Hz, 2H), 7.43 – 7.32 (m, 4H), 5.55 (s, 1H), 4.31 – 4.11 (m, 2H), 2.38 (s, 3H), 2.07 (s, 3H), 1.11 (t,  $J = 7.1$  Hz, 3H);  $^{13}\text{C}$  NMR (100 MHz,  $\text{CDCl}_3$ )  $\delta$  200.5, 166.9, 166.8, 166.5, 158.0, 132.4, 132.4, 130.4, 128.8, 128.7, 128.1, 127.2, 125.7, 116.7, 95.7, 72.8, 69.6, 63.6, 29.6, 22.1, 13.75; HRMS(ESI)  $m/z$  Calcd for  $\text{C}_{25}\text{H}_{23}\text{NO}_7$   $[\text{M}+\text{Na}]^+$  = 472.1367, found: 472.1373.

Methyl 3a-acetyl-3-benzamido-6a-methyl-2-oxo-5-phenyl-2,3,3a,6a-tetrahydrofuro

[2,3-b]furan-3-carboxylate ( $\pm$ )-3b:

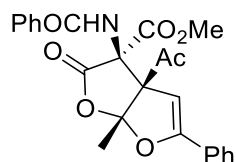

Colorless solid; 90% isolated yield = 58.8 mg; m.p. 122.2-123.1 °C;  $^1\text{H}$  NMR (400 MHz,  $\text{CDCl}_3$ )  $\delta$  7.82 – 7.76 (m, 2H), 7.66 – 7.59 (m, 2H), 7.56 (t,  $J = 7.4$  Hz, 1H), 7.46 (t,  $J = 7.6$  Hz, 2H), 7.44 – 7.35 (m, 4H), 5.58 (s, 1H), 3.72 (s, 3H), 2.39 (s, 3H), 2.03 (s, 3H);  $^{13}\text{C}$  NMR (100 MHz,  $\text{CDCl}_3$ )  $\delta$  201.1, 167.2, 166.9, 166.6, 158.3, 132.5, 132.4, 130.5, 128.8, 128.7, 128.1, 127.2, 125.7, 116.4, 95.6, 72.5, 69.8, 53.7, 29.7, 22.1; HRMS(ESI)  $m/z$  Calcd for  $\text{C}_{24}\text{H}_{21}\text{NO}_7$   $[\text{M}+\text{Na}]^+$  = 458.1210, found: 458.1217.

Benzyl 3a-acetyl-3-benzamido-6a-methyl-2-oxo-5-phenyl-2,3,3a,6a-tetrahydrofuro

[2,3-b]furan-3-carboxylate ( $\pm$ )-3c:

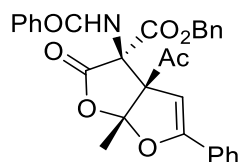

Colorless solid; 82% isolated yield = 62.9 mg; m.p. 128.1-129.2°C;  $^1\text{H}$  NMR (400 MHz,  $\text{CDCl}_3$ )  $\delta$  7.83 – 7.76 (m, 2H), 7.58 – 7.51 (m, 2H), 7.46 (t,  $J = 7.5$  Hz, 2H), 7.43 – 7.38 (m, 3H), 7.37 – 7.31 (m, 2H), 7.31 – 7.26 (m, 1H), 7.25 – 7.17 (m, 4H), 5.30 (s, 1H), 5.18 (s, 2H), 2.31 (s, 3H), 2.04 (s, 3H);  $^{13}\text{C}$  NMR (100 MHz,  $\text{CDCl}_3$ )  $\delta$  201.5, 166.7, 166.4, 166.3, 158.1, 133.8, 132.5, 132.4, 130.3, 128.8, 128.7, 128.6, 128.5, 127.9, 127.2, 125.8, 116.3, 95.5, 72.5, 69.3, 69.0, 29.8, 22.0; HRMS(ESI)  $m/z$  Calcd for  $\text{C}_{30}\text{H}_{25}\text{NO}_7$   $[\text{M}+\text{Na}]^+ = 534.1523$ , found: 534.1525.

Isopropyl 3a-acetyl-3-benzamido-6a-methyl-2-oxo-5-phenyl-2,3,3a,6a-tetrahydrofuro[2,3-b]furan-3-carboxylate ( $\pm$ )-3d:

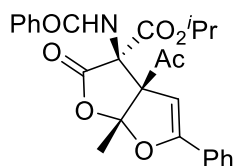

Colorless solid; 81% isolated yield = 56.3 mg; m.p. 111.1-112.1°C;  $^1\text{H}$  NMR (400 MHz,  $\text{CDCl}_3$ )  $\delta$  7.83 – 7.75 (m, 2H), 7.67 – 7.60 (m, 2H), 7.55 (t,  $J = 7.4$  Hz, 1H), 7.46 (t,  $J = 7.5$  Hz, 2H), 7.43 – 7.34 (m, 4H), 5.49 (s, 1H), 5.14 – 4.98 (m, 1H), 2.37 (s, 3H), 2.11 (s, 3H), 1.22 (d,  $J = 6.2$  Hz, 3H), 1.04 (d,  $J = 6.3$  Hz, 3H);  $^{13}\text{C}$  NMR (100 MHz,  $\text{CDCl}_3$ )  $\delta$  200.0, 166.8, 166.5, 166.4, 157.7, 132.4, 132.4, 130.3, 128.8, 128.6, 128.1, 127.2, 125.7, 116.8, 95.7, 72.9, 72.4, 69.3, 29.5, 22.1, 21.3, 21.3; HRMS(ESI)  $m/z$  Calcd for  $\text{C}_{26}\text{H}_{25}\text{NO}_7$   $[\text{M}+\text{Na}]^+ = 486.1523$ , found: 486.1528.

Ethyl 3a-acetyl-3-(2-fluorobenzamido)-6a-methyl-2-oxo-5-phenyl-2,3,3a,6a-tetrahydrofuro[2,3-b]furan-3-carboxylate ( $\pm$ )-3e:



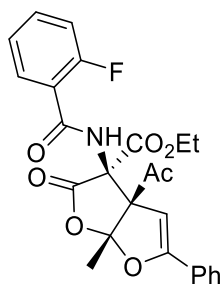

Colorless solid; 88% isolated yield = 60.70 mg; m.p. 101.5-102.3°C;  $^1\text{H}$  NMR (400 MHz,  $\text{CDCl}_3$ )  $\delta$  8.10 – 8.00 (m, 2H), 7.66 – 7.57 (m, 2H), 7.56 – 7.49 (m, 1H), 7.45 – 7.38 (m, 3H), 7.31 – 7.26 (m, 1H), 7.21 – 7.12 (m, 1H), 5.46 (s, 1H), 4.29 – 4.19 (m, 2H), 2.36 (s, 3H), 2.14 (s, 3H), 1.13 (t,  $J = 7.2$  Hz, 3H);  $^{13}\text{C}$  NMR (100 MHz,  $\text{CDCl}_3$ )  $\delta$  199.7, 166.8, 166.4, 162.3 (d,  $J = 3.2$  Hz), 160.9 (d,  $J = 248.6$  Hz), 157.8, 134.4 (d,  $J = 9.6$  Hz), 132.3, 130.4, 128.6, 128.1, 125.7, 125.0 (d,  $J = 3.2$  Hz), 119.1 (d,  $J = 11.0$  Hz), 117.0, 116.1 (d,  $J = 24.5$  Hz), 112.0, 95.3, 73.1, 69.5, 63.7, 29.3, 22.0, 13.7;  $^{19}\text{F}$  NMR (376 MHz,  $\text{CDCl}_3$ )  $\delta$  -111.16; HRMS(ESI)  $m/z$  Calcd for  $\text{C}_{25}\text{H}_{22}\text{FNO}_7 = [\text{M}+\text{Na}]^+ 490.1272$ , found: 490.1282.

Ethyl 3a-acetyl-3-(3-fluorobenzamido)-6a-methyl-2-oxo-5-phenyl-2,3,3a,6a-tetrahydrofuro[2,3-b]furan-3-carboxylate ( $\pm$ )-3f:

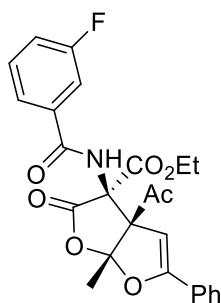

Colorless solid; 87% isolated yield = 61.00 mg; m.p. 150.3-151.2°C;  $^1\text{H}$  NMR (400 MHz,  $\text{CDCl}_3$ )  $\delta$  7.66 – 7.60 (m, 2H), 7.58 – 7.48 (m, 2H), 7.48 – 7.39 (m, 4H), 7.35 (s, 1H), 7.26 – 7.22 (m, 1H), 5.56 (s, 1H), 4.26 – 4.11 (m, 2H), 2.38 (s, 3H), 2.04 (s, 3H), 1.11 (t,  $J = 7.1$  Hz, 3H);  $^{13}\text{C}$  NMR (100 MHz,  $\text{CDCl}_3$ )  $\delta$  200.9, 166.8, 166.5, 165.3 (d,  $J = 2.5$  Hz), 162.7 (d,  $J = 248.5$  Hz), 158.2, 134.7 (d,  $J = 7.0$  Hz), 130.6, 130.5, 128.7, 128.0, 125.7, 122.6 (d,  $J = 3.1$  Hz), 119.5 (d,  $J = 21.3$  Hz), 116.5, 114.7 (d,  $J = 23.2$  Hz), 95.6, 72.6, 69.7, 63.7, 29.6, 22.1, 13.7;  $^{19}\text{F}$  NMR (376 MHz,  $\text{CDCl}_3$ )  $\delta$  -108.9; HRMS(ESI)  $m/z$  Calcd for  $\text{C}_{25}\text{H}_{22}\text{FNO}_7$   $[\text{M}+\text{Na}]^+ = 490.1272$ , found: 490.1275.

Ethyl 3a-acetyl-6a-methyl-3-(3-methylbenzamido)-2-oxo-5-phenyl-2,3,3a,6a-tetrahydrofuro[2,3-b]furan-3-carboxylate ( $\pm$ )-3g:

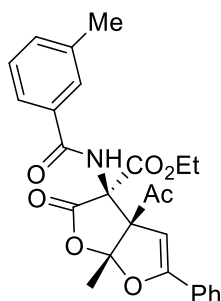

Colorless solid; 87% isolated yield = 60.48 mg; m.p. 122.9-123.5°C;  $^1\text{H}$  NMR (400 MHz,  $\text{CDCl}_3$ )  $\delta$  7.65 – 7.59 (m, 3H), 7.56 (d,  $J = 6.4$  Hz, 1H), 7.44 – 7.39 (m, 3H), 7.38 – 7.29 (m, 3H), 5.55 (s, 1H), 4.27 – 4.10 (m, 2H), 2.40 (s, 3H), 2.38 (s, 3H), 2.07 (s, 3H), 1.10 (t,  $J = 7.1$  Hz, 3H);  $^{13}\text{C}$  NMR (100 MHz,  $\text{CDCl}_3$ )  $\delta$  200.3, 167.0, 166.8, 166.7, 157.9, 138.7, 133.2, 132.4, 130.4, 128.7, 128.6, 128.1, 127.9, 125.7, 124.1, 116.7, 95.7, 72.8, 69.7, 63.6, 29.5, 22.1, 21.3, 13.7; HRMS(ESI)  $m/z$  Calcd for  $\text{C}_{26}\text{H}_{25}\text{NO}_7$   $[\text{M}+\text{Na}]^+ = 486.1523$ , found: 486.1530.

Ethyl 3a-acetyl-3-(4-fluorobenzamido)-6a-methyl-2-oxo-5-phenyl-2,3,3a,6a-tetrahydrofuro[2,3-b]furan-3-carboxylate ( $\pm$ )-3h:

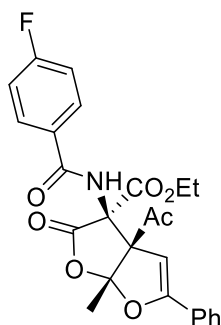

Colorless solid; 87% isolated yield = 61.00 mg; m.p. 111.1-112.1°C;  $^1\text{H}$  NMR (400 MHz,  $\text{CDCl}_3$ )  $\delta$  7.87 – 7.74 (m, 2H), 7.63 (d,  $J = 4.2$  Hz, 2H), 7.42 (s, 3H), 7.32 (s, 1H), 7.14 (t,  $J = 8.4$  Hz, 2H), 5.55 (s, 1H), 4.28 – 4.10 (m, 2H), 2.37 (s, 3H), 2.05 (s, 3H), 1.11 (t,  $J = 7.1$  Hz, 3H);  $^{13}\text{C}$  NMR (100 MHz,  $\text{CDCl}_3$ )  $\delta$  200.8, 166.9, 166.7, 165.5, 165.3 (d,  $J = 253.6$  Hz), 158.1, 130.5, 129.7 (d,  $J = 9.2$  Hz), 128.7, 128.0, 125.7, 116.6, 115.9 (d,  $J = 22.1$  Hz), 95.6, 72.6, 69.7, 63.7, 29.6, 22.1, 13.7;  $^{19}\text{F}$  NMR (376 MHz,

CDCl<sub>3</sub>)  $\delta$  -112.4; HRMS(ESI)  $m/z$  Calcd for C<sub>25</sub>H<sub>22</sub>FNO<sub>7</sub> [M+Na]<sup>+</sup> = 490.1272, found: 490.1278.

Ethyl 3a-acetyl-3-(4-chlorobenzamido)-6a-methyl-2-oxo-5-phenyl-2,3,3a,6a-tetrahydrofuro[2,3-b]furan-3-carboxylate ( $\pm$ )-3i:

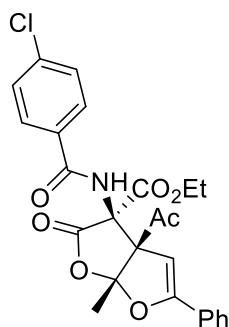

Colorless solid; 91% isolated yield = 66.04 mg; m.p. 134.5-135.1°C; <sup>1</sup>H NMR (400 MHz, CDCl<sub>3</sub>)  $\delta$  7.73 (d,  $J$  = 8.5 Hz, 2H), 7.66 – 7.59 (m, 2H), 7.48 – 7.39 (m, 5H), 7.33 (s, 1H), 5.55 (s, 1H), 4.27 – 4.10 (m, 2H), 2.37 (s, 3H), 2.04 (s, 3H), 1.11 (t,  $J$  = 7.1 Hz, 3H); <sup>13</sup>C NMR (100 MHz, CDCl<sub>3</sub>)  $\delta$  200.8, 166.8, 166.6, 165.5, 158.1, 138.8, 130.8, 130.5, 129.1, 128.7, 128.6, 128.0, 125.7, 116.5, 95.6, 72.6, 69.7, 63.7, 29.6, 22.1, 13.7; HRMS(ESI)  $m/z$  Calcd for C<sub>25</sub>H<sub>22</sub>ClNO<sub>7</sub> [M+Na]<sup>+</sup> = 506.0977, found: 506.0980.

Ethyl 3a-acetyl-3-(4-bromobenzamido)-6a-methyl-2-oxo-5-phenyl-2,3,3a,6a-tetrahydrofuro[2,3-b]furan-3-carboxylate ( $\pm$ )-3j:

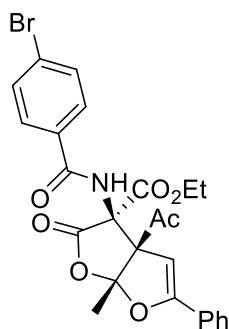

Colorless solid; 92% isolated yield = 72.92. mg; m.p. 126.3-127.1 °C; <sup>1</sup>H NMR (400 MHz, CDCl<sub>3</sub>)  $\delta$  7.68 – 7.58 (m, 6H), 7.44 – 7.38 (m, 3H), 7.34 (s, 1H), 5.55 (s, 1H), 4.26 – 4.11 (m, 2H), 2.37 (s, 3H), 2.04 (s, 3H), 1.11 (t,  $J$  = 7.2 Hz, 3H); <sup>13</sup>C NMR (100 MHz, CDCl<sub>3</sub>)  $\delta$  200.8, 166.8, 166.6, 165.7, 158.1, 132.0, 131.3, 130.5, 128.8, 128.7, 128.0, 127.3, 125.7, 116.5, 95.6, 72.6, 69.7, 63.7, 29.6, 22.1, 13.7; HRMS(ESI)  $m/z$

Calcd for C<sub>25</sub>H<sub>22</sub>BrNO<sub>7</sub> [M+Na]<sup>+</sup> = 550.0472, found: 550.0479.

Ethyl 3a-acetyl-6a-methyl-3-(4-methylbenzamido)-2-oxo-5-phenyl-2,3,3a,6a-tetrahydrofuro[2,3-b]furan-3-carboxylate(±)-3k:

:

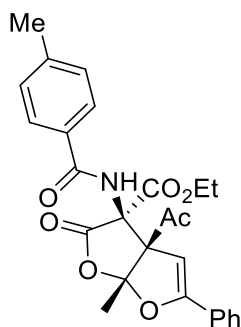

Colorless solid; 89% isolated yield = 61.87 mg; m.p. 165.5-166.1 °C; <sup>1</sup>H NMR (400 MHz, CDCl<sub>3</sub>) δ 7.68 (d, *J* = 8.2 Hz, 2H), 7.65 – 7.59 (m, 2H), 7.44 – 7.37 (m, 3H), 7.25 (d, *J* = 7.5 Hz, 2H), 5.53 (s, 1H), 4.25 – 4.12 (m, 2H), 2.41 (s, 3H), 2.36 (s, 3H), 2.08 (s, 3H), 1.11 (t, *J* = 7.2 Hz, 3H); <sup>13</sup>C NMR (100 MHz, CDCl<sub>3</sub>) δ 200.3, 167.0, 166.9, 166.4, 157.9, 143.1, 130.4, 129.5, 129.4, 128.7, 128.1, 127.2, 125.7, 116.7, 95.7, 72.8, 69.5, 63.6, 29.5, 22.1, 21.5, 13.7; HRMS(ESI) *m/z* Calcd for C<sub>26</sub>H<sub>25</sub>NO<sub>7</sub> [M+Na]<sup>+</sup> = 486.1523, found: 486.1526.

Ethyl 3a-acetyl-3-(3-methoxybenzamido)-6a-methyl-2-oxo-5-phenyl-2,3,3a,6a-tetrahydrofuro[2,3-b]furan-3-carboxylate (±)-3l:

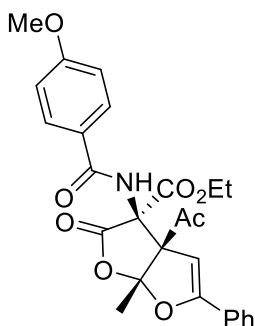

Colorless solid; 87% isolated yield = 62.57 mg; m.p. 158.5-159.3 °C; <sup>1</sup>H NMR (400 MHz, CDCl<sub>3</sub>) δ 7.76 (d, *J* = 8.7 Hz, 2H), 7.69 – 7.58 (m, 2H), 7.49 – 7.36 (m, 3H), 7.28 (s, 1H), 6.94 (d, *J* = 8.7 Hz, 2H), 5.52 (s, 1H), 4.32 – 4.14 (m, 2H), 3.86 (s, 3H), 2.36 (s, 3H), 2.09 (s, 3H), 1.11 (t, *J* = 7.1 Hz, 3H); <sup>13</sup>C NMR (100 MHz, CDCl<sub>3</sub>) δ 200.3,

167.0, 165.9, 163.0, 157.9, 130.4, 129.2, 128.7, 128.1, 125.7, 124.6, 116.7, 113.9, 95.7, 72.8, 69.5, 63.6, 55.5, 29.5, 22.1, 13.7; HRMS(ESI)  $m/z$  Calcd for  $C_{26}H_{25}NO_8$   $[M+Na]^+$  = 502.1472, found: 502.1479.

Ethyl 3a-acetyl-3-(furan-2-carboxamido)-6a-methyl-2-oxo-5-phenyl-2,3,3a,6a-tetrahydrofuro[2,3-b]furan-3-carboxylate ( $\pm$ )-**3m**:

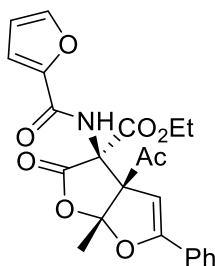

Colorless solid; 76% isolated yield = 50.09 mg; m.p. 114.4-115.3°C;  $^1H$  NMR (400 MHz,  $CDCl_3$ )  $\delta$  7.67 – 7.58 (m, 2H), 7.49 (d,  $J$  = 11.2 Hz, 2H), 7.44 – 7.35 (m, 3H), 7.17 (d,  $J$  = 3.5 Hz, 1H), 6.56 – 6.50 (m, 1H), 5.54 (s, 1H), 4.26 – 4.11 (m, 2H), 2.37 (s, 3H), 2.05 (s, 3H), 1.10 (t,  $J$  = 7.1 Hz, 3H);  $^{13}C$  NMR (100 MHz,  $CDCl_3$ )  $\delta$  200.2, 166.6, 158.0, 157.2, 146.3, 144.9, 130.4, 128.7, 128.1, 125.6, 116.8, 116.2, 112.5, 95.5, 72.9, 69.2, 63.7, 29.5, 22.1, 13.7; HRMS(ESI)  $m/z$  Calcd for  $C_{23}H_{21}NO_8$   $[M+Na]^+$  = 462.1159, found: 462.1161.

Ethyl 3a-acetyl-6a-methyl-2-oxo-5-phenyl-3-(thiophene-2-carboxamido)-2,3,3a,6a-tetrahydrofuro[2,3-b]furan-3-carboxylate ( $\pm$ )-**3n**:

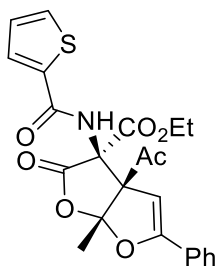

Colorless solid; 78% isolated yield = 53.28 mg; m.p. 107.4-108.2 °C;  $^1H$  NMR (400 MHz,  $CDCl_3$ )  $\delta$  7.66 – 7.60 (m, 2H), 7.59 (dd,  $J$  = 3.7, 0.8 Hz, 1H), 7.55 (dd,  $J$  = 5.0, 0.8 Hz, 1H), 7.44 – 7.37 (m, 3H), 7.19 (s, 1H), 7.14 – 7.08 (m, 1H), 5.55 (s, 1H), 4.27 – 4.09 (m, 2H), 2.38 (s, 3H), 2.04 (s, 3H), 1.10 (t,  $J$  = 7.2 Hz, 3H);  $^{13}C$  NMR (100 MHz,

CDCl<sub>3</sub>)  $\delta$  200.6, 166.9, 166.6, 161.0, 158.0, 136.6, 131.5, 130.4, 129.6, 128.7, 128.1, 127.9, 125.7, 116.6, 95.7, 72.7, 69.6, 63.7, 29.5, 22.1, 13.7; HRMS(ESI)  $m/z$  Calcd for C<sub>23</sub>H<sub>21</sub>NO<sub>7</sub>S = [M+Na]<sup>+</sup> 478.0931, found: 478.0931.

Ethyl 3-(1-naphthamido)-3a-acetyl-6a-methyl-2-oxo-5-phenyl-2,3,3a,6a-tetrahydrofuro[2,3-b]furan-3-carboxylate ( $\pm$ )-3o:

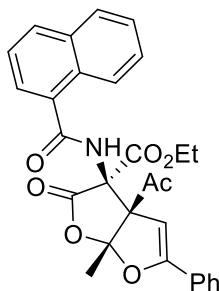

Colorless solid; 91% isolated yield = 68.18 mg; m.p. 110.5-111.2°C; <sup>1</sup>H NMR (400 MHz, CDCl<sub>3</sub>)  $\delta$  8.31 (d,  $J$  = 8.4 Hz, 1H), 7.95 (d,  $J$  = 8.2 Hz, 1H), 7.87 (d,  $J$  = 8.0 Hz, 1H), 7.72 – 7.63 (m, 3H), 7.61 – 7.46 (m, 3H), 7.45 – 7.37 (m, 3H), 7.15 (s, 1H), 5.68 (s, 1H), 4.27 – 4.06 (m, 2H), 2.45 (s, 3H), 2.07 (s, 3H), 1.10 (t,  $J$  = 7.1 Hz, 3H); <sup>13</sup>C NMR (100 MHz, CDCl<sub>3</sub>)  $\delta$  200.5, 169.0, 167.4, 166.5, 158.1, 133.6, 132.1, 131.4, 130.4, 130.1, 128.7, 128.2, 128.1, 127.6, 126.7, 125.7, 125.2, 124.6, 116.8, 95.8, 72.8, 70.2, 63.7, 29.7, 22.3, 13.7; HRMS(ESI)  $m/z$  Calcd for C<sub>29</sub>H<sub>25</sub>NO<sub>7</sub> [M+Na]<sup>+</sup> = 522.1523, found: 522.1527.

Ethyl 3a-acetyl-3-benzamido-6a-methyl-5-(naphthalen-2-yl)-2-oxo-2,3,3a,6a-tetrahydrofuro[2,3-b]furan-3-carboxylate( $\pm$ )-3p:

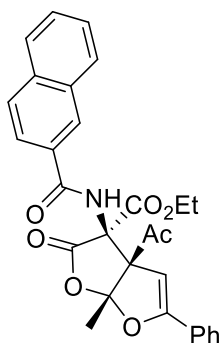

Colorless solid; 80% isolated yield = 59.94 mg; m.p. 117.3-118.1°C; <sup>1</sup>H NMR (400

MHz, CDCl<sub>3</sub>)  $\delta$  8.16 (s, 1H), 7.94 – 7.87 (m, 1H), 7.88 – 7.82 (m, 2H), 7.80 (d,  $J$  = 7.3 Hz, 2H), 7.63 (dd,  $J$  = 8.6, 1.4 Hz, 1H), 7.59 – 7.52 (m, 3H), 7.47 (t,  $J$  = 7.6 Hz, 2H), 7.37 (s, 1H), 5.68 (s, 1H), 4.25 – 4.10 (m, 2H), 2.42 (s, 3H), 2.12 (s, 3H), 1.08 (t,  $J$  = 7.1 Hz, 3H); <sup>13</sup>C NMR (100 MHz, CDCl<sub>3</sub>)  $\delta$  200.3, 167.0, 166.8, 166.6, 158.0, 134.0, 132.9, 132.5, 132.4, 128.8, 128.7, 128.5, 127.8, 127.4, 127.2, 126.9, 125.7, 125.2, 122.5, 116.8, 96.4, 72.9, 69.7, 63.7, 29.6, 22.2, 13.7; HRMS(ESI)  $m/z$  Calcd for C<sub>29</sub>H<sub>25</sub>NO<sub>7</sub> [M+Na]<sup>+</sup> = 522.1523, found: 522.1526.

Ethyl 3a-acetyl-3-benzamido-6a-methyl-2-oxo-5-(o-tolyl)-2,3,3a,6a-tetrahydrofuro  
[2,3-b]furan-3-carboxylate ( $\pm$ )-**3q**:

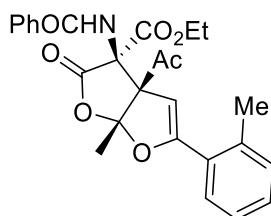

Colorless solid; 83% isolated yield = 57.69 mg; m.p. 134.3-135.1°C; <sup>1</sup>H NMR (400 MHz, CDCl<sub>3</sub>)  $\delta$  7.82 – 7.78 (m, 2H), 7.59 – 7.51 (m, 2H), 7.46 (t,  $J$  = 7.5 Hz, 3H), 7.35 – 7.29 (m, 1H), 7.26 – 7.21 (m, 2H), 5.28 (s, 1H), 4.37 – 4.16 (m, 2H), 2.47 (s, 3H), 2.39 (s, 3H), 2.09 (s, 3H), 1.17 (t,  $J$  = 7.2 Hz, 3H); <sup>13</sup>C NMR (100 MHz, CDCl<sub>3</sub>)  $\delta$  200.8, 167.0, 166.5, 166.3, 158.6, 136.7, 132.5, 132.4, 131.2, 130.1, 128.8, 128.3, 127.8, 127.2, 126.0, 116.1, 99.8, 72.8, 69.2, 63.7, 29.6, 21.9, 21.4, 13.7; HRMS(ESI)  $m/z$  Calcd for C<sub>26</sub>H<sub>25</sub>NO<sub>7</sub> [M+Na]<sup>+</sup> = 486.1523, found: 486.1528.

Ethyl 3a-acetyl-3-benzamido-6a-methyl-2-oxo-5-(m-tolyl)-2,3,3a,6a-tetrahydrofuro  
[2,3-b]furan-3-carboxylate ( $\pm$ )-**3r**:

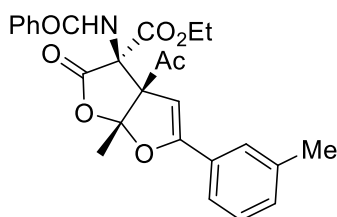

Colorless solid; 86% isolated yield = 59.78 mg; m.p. 123.5-124.1°C; <sup>1</sup>H NMR (400 MHz, CDCl<sub>3</sub>)  $\delta$  7.83 – 7.76 (m, 2H), 7.55 (t,  $J$  = 7.4 Hz, 1H), 7.50 – 7.40 (m, 4H), 7.37

(s, 1H), 7.29 (t,  $J = 7.6$  Hz, 1H), 7.23 (d,  $J = 7.5$  Hz, 1H), 5.53 (s, 1H), 4.27 – 4.14 (m, 2H), 2.38 (s, 3H), 2.38 (s, 3H), 2.06 (s, 3H), 1.12 (t,  $J = 7.2$  Hz, 3H);  $^{13}\text{C}$  NMR (100 MHz,  $\text{CDCl}_3$ )  $\delta$  200.6, 166.9, 166.8, 166.5, 158.2, 138.5, 132.4, 131.2, 128.8, 128.5, 128.0, 127.2, 126.3, 122.8, 116.6, 95.5, 72.7, 69.6, 63.6, 29.6, 22.1, 21.3, 13.7; HRMS(ESI)  $m/z$  Calcd for  $\text{C}_{26}\text{H}_{25}\text{NO}_7$   $[\text{M}+\text{Na}]^+ = 486.1523$ , found: 486.1533.

Ethyl 3a-acetyl-3-benzamido-5-(4-fluorophenyl)-6a-methyl-2-oxo-2,3,3a,6a-tetrahydrofuro[2,3-b]furan-3-carboxylate ( $\pm$ )-3s:

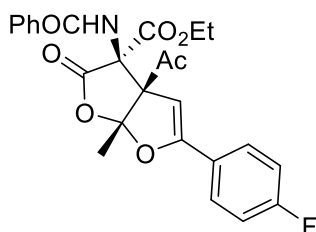

Colorless solid; 90% isolated yield = 61.13 mg; m.p. 134.5-135.3°C;  $^1\text{H}$  NMR (400 MHz,  $\text{CDCl}_3$ )  $\delta$  7.81 – 7.72 (m, 2H), 7.65 – 7.58 (m, 2H), 7.59 – 7.53 (m, 1H), 7.46 (t,  $J = 7.5$  Hz, 2H), 7.35 (s, 1H), 7.15 – 7.02 (m, 2H), 5.49 (s, 1H), 4.26 – 4.14 (m, 2H), 2.37 (s, 3H), 2.06 (s, 3H), 1.11 (t,  $J = 7.2$  Hz, 3H);  $^{13}\text{C}$  NMR (100 MHz,  $\text{CDCl}_3$ )  $\delta$  200.3, 166.8, 166.7, 166.5, 163.8 (d,  $J = 251.6$  Hz), 157.0, 132.5, 132.4, 128.8, 127.8, 127.8 (d,  $J = 8.5$  Hz), 124.4 (d,  $J = 3.4$  Hz), 116.7, 115.9 (d,  $J = 22.1$  Hz), 95.4 (d,  $J = 1.8$  Hz), 72.8, 69.6, 63.6, 29.5, 22.1, 13.7;  $^{19}\text{F}$  NMR (376 MHz,  $\text{CDCl}_3$ )  $\delta$  -108.9; HRMS(ESI)  $m/z$   $[\text{M}+\text{Na}]$  Calcd for  $\text{C}_{25}\text{H}_{22}\text{FNO}_7$   $[\text{M}+\text{Na}]^+ = 490.1272$ , found: 490.1276

Ethyl 3a-acetyl-3-benzamido-5-(4-chlorophenyl)-6a-methyl-2-oxo-2,3,3a,6a-tetrahydrofuro[2,3-b]furan-3-carboxylate ( $\pm$ )-3t:

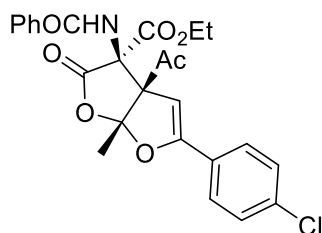

Colorless solid; 87% isolated yield = 63.15 mg; m.p. 143.5-143.9°C;  $^1\text{H}$  NMR (400 MHz,  $\text{CDCl}_3$ )  $\delta$  7.82 – 7.76 (m, 2H), 7.59 – 7.51 (m, 3H), 7.46 (t,  $J = 7.5$  Hz, 2H), 7.42



– 7.37 (m, 2H), 7.34 (s, 1H), 5.55 (s, 1H), 4.26 – 4.10 (m, 2H), 2.37 (s, 3H), 2.06 (s, 3H), 1.11 (t,  $J = 7.2$  Hz, 3H);  $^{13}\text{C}$  NMR (100 MHz,  $\text{CDCl}_3$ )  $\delta$  200.1, 166.8, 166.7, 166.5, 156.9, 136.4, 132.5, 132.3, 129.0, 128.8, 127.2, 127.0, 126.6, 116.7, 96.2, 72.8, 69.6, 63.7, 29.5, 22.1, 13.8; HRMS(ESI)  $m/z$  Calcd for  $\text{C}_{25}\text{H}_{22}\text{ClNO}_7$   $[\text{M}+\text{Na}]^+ = 506.0977$ , found: 506.0986.

Ethyl 3a-acetyl-3-benzamido-5-(4-bromophenyl)-6a-methyl-2-oxo-2,3,3a,6a-tetrahydrofuro[2,3-b]furan-3-carboxylate ( $\pm$ )-**3u**:

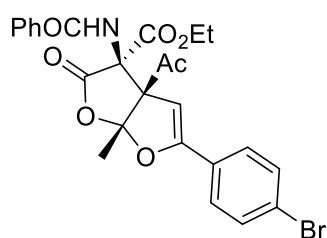

Colorless solid; 91% isolated yield = 74.14 mg; m.p. 145.4-146.3 °C;  $^1\text{H}$  NMR (400 MHz,  $\text{CDCl}_3$ )  $\delta$  7.81 – 7.76 (m, 2H), 7.58 – 7.52 (m, 3H), 7.51 – 7.44 (m, 4H), 7.34 (s, 1H), 5.57 (s, 1H), 4.26 – 4.08 (m, 2H), 2.37 (s, 3H), 2.06 (s, 3H), 1.12 (t,  $J = 7.2$  Hz, 3H);  $^{13}\text{C}$  NMR (100 MHz,  $\text{CDCl}_3$ )  $\delta$  200.0, 166.8, 166.7, 166.5, 157.0, 132.5, 132.3, 132.0, 128.8, 127.2, 127.1, 127.0, 124.7, 116.7, 96.3, 72.8, 69.5, 63.7, 29.5, 22.1, 13.8; HRMS(ESI)  $m/z$  Calcd for  $\text{C}_{25}\text{H}_{22}\text{BrNO}_7$   $[\text{M}+\text{Na}]^+ = 550.0472$ , found: 550.0480.

Ethyl 3a-acetyl-3-benzamido-6a-methyl-5-(4-nitrophenyl)-2-oxo-2,3,3a,6a-tetrahydrofuro[2,3-b]furan-3-carboxylate ( $\pm$ )-**3v**:

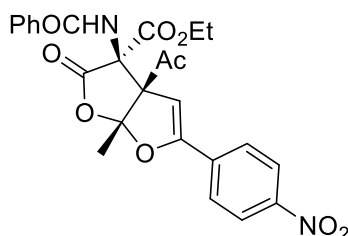

Colorless solid; 75% isolated yield = 55.62 mg; m.p. 145.2-146.1°C;  $^1\text{H}$  NMR (400 MHz,  $\text{CDCl}_3$ )  $\delta$  8.28 (d,  $J = 8.8$  Hz, 2H), 7.86 – 7.76 (m, 4H), 7.57 (t,  $J = 7.4$  Hz, 1H), 7.47 (t,  $J = 7.6$  Hz, 2H), 7.32 (s, 1H), 5.81 (s, 1H), 4.29 – 4.14 (m, 2H), 2.40 (s, 3H), 2.09 (s, 3H), 1.11 (t,  $J = 7.1$  Hz, 3H);  $^{13}\text{C}$  NMR (100 MHz,  $\text{CDCl}_3$ )  $\delta$  199.2, 166.6, 166.6, 166.5, 155.7, 148.6, 133.9, 132.6, 132.2, 128.8, 127.2, 126.5, 124.0, 117.0, 99.9,

73.0, 69.5, 63.8, 29.6, 22.1, 13.8; HRMS(ESI)  $m/z$  Calcd for  $C_{25}H_{22}N_2O_9$   $[M+Na]^+$  = 517.1217, found: 517.1220.

Ethyl 3a-acetyl-3-benzamido-6a-methyl-2-oxo-5-(p-tolyl)-2,3,3a,6a-tetrahydrofuro  
[2,3-b]furan-3-carboxylate ( $\pm$ )-3w:

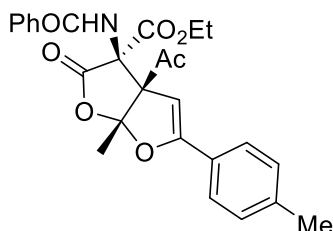

Colorless solid; 85% isolated yield = 59.11 mg; m.p. 125.5-126.1°C;  $^1H$  NMR (400 MHz,  $CDCl_3$ )  $\delta$  7.82 – 7.73 (m, 2H), 7.59 – 7.42 (m, 5H), 7.37 (s, 1H), 7.21 (d,  $J$  = 8.1 Hz, 2H), 5.47 (s, 1H), 4.27 – 4.12 (m, 2H), 2.39 (s, 3H), 2.37 (s, 3H), 2.06 (s, 3H), 1.12 (t,  $J$  = 7.2 Hz, 3H);  $^{13}C$  NMR (100 MHz,  $CDCl_3$ )  $\delta$  200.7, 166.9, 166.8, 166.5, 158.1, 140.7, 132.5, 132.4, 129.4, 128.7, 127.2, 125.6, 125.3, 116.6, 94.7, 72.7, 69.6, 63.6, 29.6, 22.1, 21.5, 13.7; HRMS(ESI)  $m/z$  Calcd for  $C_{26}H_{25}NO_7$   $[M+Na]^+$  = 486.1523, found: 486.1528.

Ethyl 3a-acetyl-3-benzamido-5-(4-methoxyphenyl)-6a-methyl-2-oxo-2,3,3a,6a-  
tetrahydrofuro[2,3-b]furan-3-carboxylate ( $\pm$ )-3x:

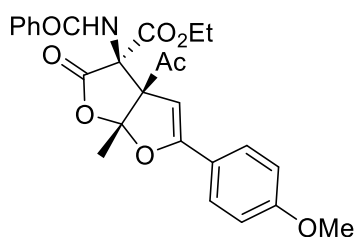

Colorless solid; 87 % isolated yield = 62.57 mg; m.p. 101.9-102.6°C;  $^1H$  NMR (400 MHz,  $CDCl_3$ )  $\delta$  7.85 – 7.75 (m, 2H), 7.55 (t,  $J$  = 7.8 Hz, 3H), 7.46 (t,  $J$  = 7.5 Hz, 2H), 7.37 (s, 1H), 6.91 (d,  $J$  = 8.9 Hz, 2H), 5.38 (s, 1H), 4.26 – 4.14 (m, 2H), 3.85 (s, 3H), 2.37 (s, 3H), 2.06 (s, 3H), 1.12 (t,  $J$  = 7.2 Hz, 3H);  $^{13}C$  NMR (100 MHz,  $CDCl_3$ )  $\delta$  200.8, 167.0, 166.8, 166.5, 161.2, 157.8, 132.5, 132.4, 128.7, 127.3, 127.2, 120.7, 116.6, 114.0, 93.6, 72.8, 69.7, 63.6, 55.4, 29.5, 22.1, 13.7; HRMS(ESI)  $m/z$  Calcd for  $C_{26}H_{25}NO_8$   $[M+Na]^+$  = 502.1472, found: 502.1479.

Ethyl 3-(2-naphthamido)-3a-acetyl-6a-methyl-2-oxo-5-phenyl-2,3,3a,6a-tetrahydrofuro[2,3-b]furan-3-carboxylate ( $\pm$ )-**3y**:

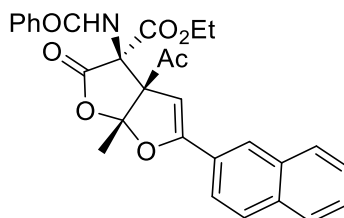

Colorless solid; 92% isolated yield = 68.93 mg; m.p. 111.4-112.3°C;  $^1\text{H}$  NMR (400 MHz,  $\text{CDCl}_3$ )  $\delta$  8.33 (s, 1H), 7.98 – 7.86 (m, 3H), 7.85 – 7.80 (m, 1H), 7.68 – 7.61 (m, 2H), 7.60 – 7.53 (m, 2H), 7.50 (s, 1H), 7.45 – 7.35 (m, 3H), 5.59 (s, 1H), 4.31 – 4.08 (m, 2H), 2.41 (s, 3H), 2.10 (s, 3H), 1.12 (t,  $J = 7.1$  Hz, 3H);  $^{13}\text{C}$  NMR (100 MHz,  $\text{CDCl}_3$ )  $\delta$  200.4, 167.1, 166.8, 166.6, 158.0, 135.1, 132.5, 130.4, 129.6, 129.1, 128.7, 128.7, 128.2, 128.2, 128.1, 127.8, 127.0, 125.7, 123.3, 116.7, 95.7, 72.8, 69.8, 63.7, 29.6, 22.2, 13.7; HRMS(ESI)  $m/z$  Calcd for  $\text{C}_{29}\text{H}_{25}\text{NO}_7$   $[\text{M}+\text{Na}]^+ = 522.1523$ , found: 522.1530.

Ethyl 5-oxo-4-(3-oxo-1-phenylbutyl)-2-phenyl-4,5-dihydrooxazole-4-carboxylate ( $\pm$ )-**7**:

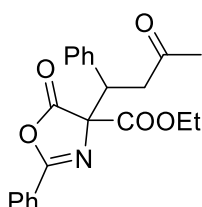

Colorless solid; 65% isolated yield = 22.74 mg; m.p. 132.6-133.1°C;  $^1\text{H}$  NMR (400 MHz,  $\text{CDCl}_3$ )  $\delta$  7.93 (d,  $J = 7.5$  Hz, 2H), 7.60 (t,  $J = 7.4$  Hz, 1H), 7.47 (t,  $J = 7.7$  Hz, 2H), 7.24 – 7.17 (m, 2H), 7.17 – 7.08 (m, 3H), 4.43 – 4.36 (m, 1H), 4.36 – 4.20 (m, 2H), 3.34 – 3.15 (m, 2H), 2.08 (s, 3H), 1.30 (t,  $J = 7.1$  Hz, 2H);  $^{13}\text{C}$  NMR (100 MHz,  $\text{CDCl}_3$ )  $\delta$  205.2, 172.3, 165.1, 163.4, 136.1, 133.3, 129.2, 128.8, 128.3, 128.2, 128.0, 125.0, 80.0, 63.3, 45.4, 44.8, 30.2, 13.9; HRMS(ESI)  $m/z$  Calcd for  $\text{C}_{22}\text{H}_{21}\text{NO}_5$   $[\text{M}+\text{Na}]^+ = 402.1312$ , found: 402.1317.

Ethyl 3-benzamido-4-benzoyl-2-oxo-5,6a-diphenyl-2,3,3a,6a-tetrahydrofuro[2,3-b]furan-3-carboxylate (+)-10:

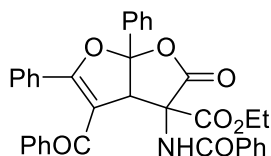

Colorless solid; 40% isolated yield = 14.00 mg; m.p. 124.7-125.1°C; <sup>1</sup>H NMR (400 MHz, CDCl<sub>3</sub>) δ 8.05 – 7.82 (m, 2H), 7.77 – 7.52 (m, 4H), 7.51 – 7.29 (m, 7H), 7.22 – 7.05 (m, 5H), 7.00 (t, *J* = 7.8 Hz, 1H), 6.83 (t, *J* = 7.8 Hz, 1H), 4.64 (d, *J* = 83.4 Hz, 1H), 4.39 – 3.98 (m, 2H), 1.22 – 1.02 (m, 3H); <sup>13</sup>C NMR (100 MHz, CDCl<sub>3</sub>) δ 192.0, 168.7, 168.5, 166.9, 166.4, 137.9, 137.4, 132.3, 132.3, 132.1, 131.9, 131.7, 131.4, 130.8, 129.9, 129.7, 129.5, 129.0, 128.8, 128.7, 128.6, 128.5, 128.1, 128.0, 127.7, 127.4, 127.4, 125.4, 125.0, 113.0, 110.9, 66.5, 64.1, 61.5, 13.7; HRMS(ESI) *m/z* Calcd for C<sub>35</sub>H<sub>27</sub>NO<sub>7</sub> [M+Na]<sup>+</sup> = 596.1680, found: 596.1690.

Catalytic asymmetric version:

Ethyl (3*R*,3*aS*,6*aR*)-3*a*-acetyl-3-benzamido-6*a*-methyl-2-oxo-5-phenyl-2,3,3*a*,6*a*-tetrahydrofuro[2,3-*b*]furan-3-carboxylate (-)-3*a*:

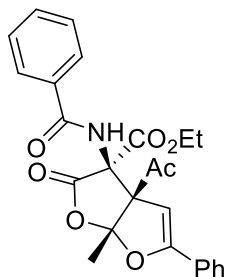

Before recrystallization: Colorless solid; 70% isolated yield = 47.19 mg; HPLC (IC column, *i*-propanol/hexane = 20/80, flow rate 1.0 mL/min, λ = 254 nm), product: *t*<sub>1</sub> = 17.05 min (major), *t*<sub>2</sub> = 20.59 min (minor), ee = 90%;

After recrystallization: Colorless solid; 60% isolated yield = 40.45 mg; HPLC (IC column, *i*-propanol/hexane = 30/70, flow rate 1.0 mL/min, λ = 254 nm), product: *t*<sub>1</sub> = 12.78 min (major), *t*<sub>2</sub> = 14.57 min (minor), ee > 99%; [α]<sup>20.0</sup><sub>D</sub> = -58.0 (*c* 0.2, CH<sub>2</sub>Cl<sub>2</sub>).

Methyl (3*R*,3*aS*,6*aR*)-3*a*-acetyl-3-benzamido-6*a*-methyl-2-oxo-5-phenyl-2,3,3*a*,6*a*-tetrahydrofuro[2,3-*b*]furan-3-carboxylate (-)-3*b*:

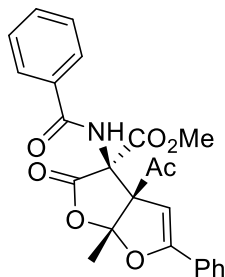

Before recrystallization: Colorless solid; 72% isolated yield = 47.03 mg; HPLC (IF column, *i*-propanol/hexane = 30/70, flow rate 1.0 mL/min,  $\lambda$  = 254 nm), product:  $t_1$  = 8.59 min (major),  $t_2$  = 10.59 min (minor), ee = 88%;

After recrystallization: Colorless solid; 65% isolated yield = 42.45 mg; HPLC (IF column, *i*-propanol/hexane = 30/70, flow rate 1.0 mL/min,  $\lambda$  = 254 nm), product:  $t_1$  = 8.53 min (major),  $t_2$  = 10.52 min (minor), ee = 96%;  $[\alpha]^{20.0}_D = -54.2$  (*c* 0.2, CH<sub>2</sub>Cl<sub>2</sub>).

Ethyl (3*R*,3*aS*,6*aR*)-3*a*-acetyl-3-(2-fluorobenzamido)-6*a*-methyl-2-oxo-5-phenyl-2,3,3*a*,6*a*-tetrahydrofuro[2,3-*b*]furan-3-carboxylate (-)-3*e*:

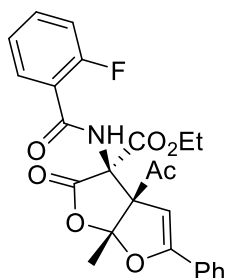

Before recrystallization: Colorless solid; 68% isolated yield = 47.68 mg; HPLC (IF column, *i*-propanol/hexane = 30/70, flow rate 1.0 mL/min,  $\lambda$  = 254 nm), product:  $t_1$  = 7.80 min (major),  $t_2$  = 10.66 min (minor), ee = 70%;

After recrystallization: Colorless solid; 35% isolated yield = 31.55 mg; HPLC (IF column, *i*-propanol/hexane = 30/70, flow rate 1.0 mL/min,  $\lambda$  = 254 nm), product:  $t_1$  = 9.04 min (major),  $t_2$  = 13.84 min (minor), ee = 92%;  $[\alpha]^{20.0}_D = -43.8$  (*c* 0.2, CH<sub>2</sub>Cl<sub>2</sub>).

Ethyl(3*R*,3*aS*,6*aR*)-3*a*-acetyl-3-(3-fluorobenzamido)-6*a*-methyl-2-oxo-5-phenyl-2,3,3*a*,6*a*-tetrahydrofuro[2,3-*b*]furan-3-carboxylate (-)-3*f*:

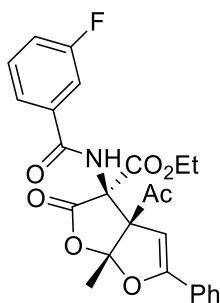

Before recrystallization: Colorless solid; 70% isolated yield = 49.08 mg; HPLC (IF column, *i*-propanol/hexane = 30/70, flow rate 1.0 mL/min,  $\lambda = 254$  nm), product:  $t_1 = 6.60$  min (major),  $t_2 = 7.73$  min (minor), ee = 82%;

After recrystallization: Colorless solid; 50% isolated yield = 35.06 mg; HPLC (IF column, *i*-propanol/hexane = 30/70, flow rate 1.0 mL/min,  $\lambda = 254$  nm), product:  $t_1 = 17.05$  min (major),  $t_2 = 20.59$  min (minor), ee = 98%;  $[\alpha]^{20.0}_D = -36.0$  (*c* 0.1, CH<sub>2</sub>Cl<sub>2</sub>).

Ethyl (3*R*,3*aS*,6*aR*)-3*a*-acetyl-3-(4-fluorobenzamido)-6*a*-methyl-2-oxo-5-phenyl-2,3,3*a*,6*a*-tetrahydrofuro[2,3-*b*]furan-3-carboxylate **(-)-3h**:

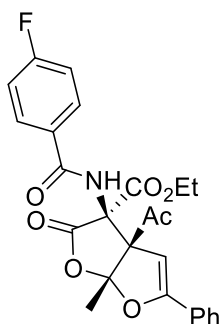

Before recrystallization: Colorless solid; 73% isolated yield = 51.19 mg; HPLC (IF column, *i*-propanol/hexane = 30/70, flow rate 1.0 mL/min,  $\lambda = 254$  nm), product:  $t_1 = 7.16$  min (major),  $t_2 = 9.54$  min (minor), ee = 84%;

After recrystallization: Colorless solid; 48% isolated yield = 33.66 mg; HPLC (IF column, *i*-propanol/hexane = 30/70, flow rate 1.0 mL/min,  $\lambda = 254$  nm), product:  $t_1 = 6.97$  min (major),  $t_2 = 8.98$  min (minor), ee = 98%;  $[\alpha]^{20.0}_D = -47.1$  (*c* 0.17, CH<sub>2</sub>Cl<sub>2</sub>).

Ethyl (3*R*,3*aS*,6*aR*)-3*a*-acetyl-3-(4-chlorobenzamido)-6*a*-methyl-2-oxo-5-phenyl-2,3,3*a*,6*a*-tetrahydrofuro[2,3-*b*]furan-3-carboxylate **(-)-3i**:

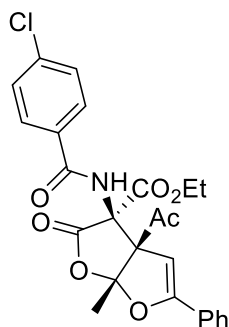

Before recrystallization: Colorless solid; 73% isolated yield = 52.99 mg; HPLC (IF column, *i*-propanol/hexane = 30/70, flow rate 1.0 mL/min,  $\lambda = 254$  nm), product:  $t_1 = 7.63$  min (major),  $t_2 = 9.68$  min (minor), ee = 80%;

After recrystallization: Colorless solid; 54% isolated yield = 39.20 mg; HPLC (IF column, *i*-propanol/hexane = 30/70, flow rate 1.0 mL/min,  $\lambda = 254$  nm), product:  $t_1 = 8.33$  min (major),  $t_2 = 10.83$  min (minor), ee > 99%;  $[\alpha]^{20.0}_D = -44.8$  (*c* 0.25, CH<sub>2</sub>Cl<sub>2</sub>).

Ethyl (3*R*,3*aS*,6*aR*)-3*a*-acetyl-3-(4-bromobenzamido)-6*a*-methyl-2-oxo-5-phenyl-2,3,3*a*,6*a*-tetrahydrofuro[2,3-*b*]furan-3-carboxylate (-)-3j:

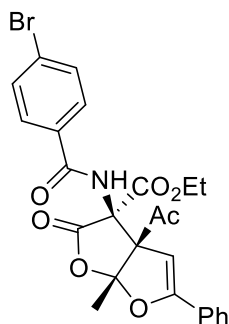

Before recrystallization: Colorless solid; 73% isolated yield = 57.85 mg; HPLC (IF column, *i*-propanol/hexane = 30/70, flow rate 1.0 mL/min,  $\lambda = 254$  nm), product:  $t_1 = 8.69$  min (major),  $t_2 = 11.41$  min (minor), ee = 88%;

After recrystallization: Colorless solid; 48% isolated yield = 38.04 mg; HPLC (IF column, *i*-propanol/hexane = 30/70, flow rate 1.0 mL/min,  $\lambda = 254$  nm), product:  $t_1 = 9.04$  min (major),  $t_2 = 11.74$  min (minor), ee > 99%;  $[\alpha]^{20.0}_D = -48.5$  (*c* 0.17, CH<sub>2</sub>Cl<sub>2</sub>).

Ethyl (3*R*,3*aS*,6*aR*)-3*a*-acetyl-3-(4-methoxybenzamido)-6*a*-methyl-2-oxo-5-phenyl-2,3,3*a*,6*a*-tetrahydrofuro[2,3-*b*]furan-3-carboxylate (-)-3l:

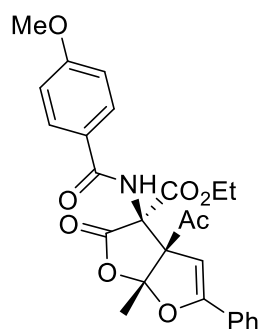

Before recrystallization: Colorless solid; 66% isolated yield = 47.47 mg; HPLC (IF column, *i*-propanol/hexane = 30/70, flow rate 1.0 mL/min,  $\lambda = 254$  nm), product:  $t_1 = 14.29$  min (major),  $t_2 = 28.69$  min (minor), ee = 84%;

After recrystallization: Colorless solid; 46% isolated yield = 33.08 mg; HPLC (IF column, *i*-propanol/hexane = 30/70, flow rate 1.0 mL/min,  $\lambda = 254$  nm), product:  $t_1 = 14.82$  min (major),  $t_2 = 30.28$  min (minor), ee = 98%;  $[\alpha]^{20.0}_D = -52.7$  (*c* 0.15, CH<sub>2</sub>Cl<sub>2</sub>).

Ethyl (3*R*,3*aS*,6*aR*)-3*a*-acetyl-6*a*-methyl-2-oxo-5-phenyl-3-(thiophene-2-carboxamido)-2,3,3*a*,6*a*-tetrahydrofuro[2,3-*b*]furan-3-carboxylate (-)-3*n*:

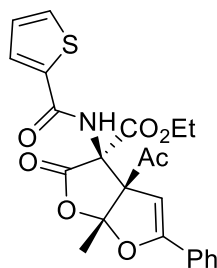

Before recrystallization: Colorless solid; 69% isolated yield = 47.14 mg; HPLC (IF column, *i*-propanol/hexane = 30/70, flow rate 1.0 mL/min,  $\lambda = 254$  nm), product:  $t_1 = 8.62$  min (major),  $t_2 = 12.36$  min (minor), ee = 86%;

After recrystallization: Colorless solid; 68% isolated yield = 46.46 mg; HPLC (IF column, *i*-propanol/hexane = 30/70, flow rate 1.0 mL/min,  $\lambda = 254$  nm), product:  $t_1 = 8.56$  min (major),  $t_2 = 11.91$  min (minor), ee = 94%;  $[\alpha]^{20.0}_D = -54.0$  (*c* 0.1, CH<sub>2</sub>Cl<sub>2</sub>).

Ethyl (3*R*,3*aS*,6*aR*)-3*a*-acetyl-3-benzamido-5-(4-fluorophenyl)-6*a*-methyl-2-oxo-2,3,3*a*,6*a*-tetrahydrofuro[2,3-*b*]furan-3-carboxylate (-)-3*s*:



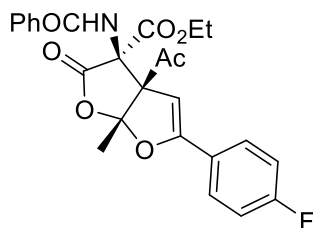

Before recrystallization: Colorless solid; 90% isolated yield = 63.11 mg; HPLC (IF column, *i*-propanol/hexane = 30/70, flow rate 1.0 mL/min,  $\lambda$  = 254 nm), product:  $t_1$  = 8.18 min (major),  $t_2$  = 11.31 min (minor), ee = 78%;

After recrystallization: Colorless solid; 48% isolated yield = 33.66 mg; HPLC (IF column, *i*-propanol/hexane = 30/70, flow rate 1.0 mL/min,  $\lambda$  = 254 nm), product:  $t_1$  = 8.19 min (major),  $t_2$  = 11.38 min (minor), ee = 90%;  $[\alpha]^{20.0}_D = -37.2$  (*c* 0.17, CH<sub>2</sub>Cl<sub>2</sub>).

Ethyl (3*R*,3*aS*,6*aR*)-3*a*-acetyl-3-benzamido-5-(4-chlorophenyl)-6*a*-methyl-2-oxo-2,3,3*a*,6*a*-tetrahydrofuro[2,3-*b*]furan-3-carboxylate **(-)-3t**:

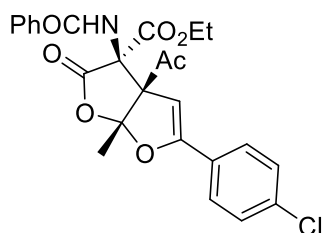

Before recrystallization: Colorless solid; 87% isolated yield = 63.15 mg; HPLC (IF column, *i*-propanol/hexane = 30/70, flow rate 1.0 mL/min,  $\lambda$  = 254 nm), product:  $t_1$  = 8.39 min (major),  $t_2$  = 11.32 min (minor), ee = 78%;

After recrystallization: Colorless solid; 45% isolated yield = 32.66 mg; HPLC (IF column, *i*-propanol/hexane = 30/70, flow rate 1.0 mL/min,  $\lambda$  = 254 nm), product:  $t_1$  = 8.41 min (major),  $t_2$  = 11.36 min (minor), ee = 92%;  $[\alpha]^{20.0}_D = -19.2$  (*c* 0.18, CH<sub>2</sub>Cl<sub>2</sub>).

Ethyl (3*R*,3*aS*,6*aR*)-3*a*-acetyl-3-benzamido-5-(4-bromophenyl)-6*a*-methyl-2-oxo-2,3,3*a*,6*a*-tetrahydrofuro[2,3-*b*]furan-3-carboxylate **(-)-3u**:

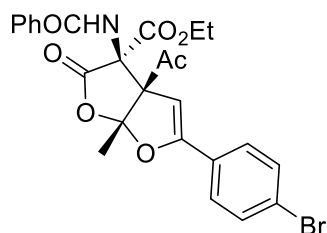

Before recrystallization: Colorless solid; 91% isolated yield = 72.12 mg; HPLC (IF column, *i*-propanol/hexane = 30/70, flow rate 1.0 mL/min,  $\lambda$  = 254 nm), product:  $t_1$  = 8.31 min (major),  $t_2$  = 11.18 min (minor), ee = 80%;

After recrystallization: Colorless solid; 48% isolated yield = 38.04 mg; HPLC (IF column, *i*-propanol/hexane = 30/70, flow rate 1.0 mL/min,  $\lambda$  = 254 nm), product:  $t_1$  = 8.96 min (major),  $t_2$  = 12.09 min (minor), ee = 94%;  $[\alpha]^{20.0}_D = -49.2$  (*c* 0.23, CH<sub>2</sub>Cl<sub>2</sub>).

Ethyl (3*R*,3*aS*,6*aR*)-3*a*-acetyl-3-benzamido-6*a*-methyl-2-oxo-5-(*p*-tolyl)-2,3,3*a*,6*a*-tetrahydrofuro[2,3-*b*]furan-3-carboxylate (-)-3w:

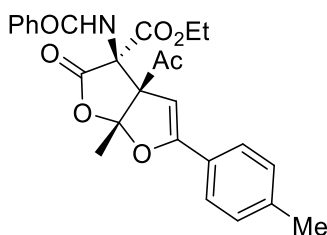

Before recrystallization: Colorless solid; 85% isolated yield = 59.09 mg; HPLC (IF column, *i*-propanol/hexane = 30/70, flow rate 1.0 mL/min,  $\lambda$  = 254 nm), product:  $t_1$  = 9.29 min (major),  $t_2$  = 12.78 min (minor), ee = 82%;

After recrystallization: Colorless solid; 55% isolated yield = 38,24 mg; HPLC (IF column, *i*-propanol/hexane = 30/70, flow rate 1.0 mL/min,  $\lambda$  = 254 nm), product:  $t_1$  = 9.39 min (major),  $t_2$  = 12.55 min (minor), ee = 90%;  $[\alpha]^{20.0}_D = -47.1$  (*c* 0.23, CH<sub>2</sub>Cl<sub>2</sub>).

Ethyl (3*R*,3*aS*,6*aR*)-3*a*-acetyl-3-benzamido-6*a*-methyl-5-(naphthalen-2-yl)-2-oxo-2,3,3*a*,6*a*-tetrahydrofuro[2,3-*b*]furan-3-carboxylate (-)-3y:

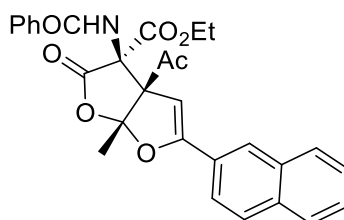

Before recrystallization: Colorless solid; 92% isolated yield = 69.93 mg; HPLC (IF column, *i*-propanol/hexane = 30/70, flow rate 1.0 mL/min,  $\lambda$  = 254 nm), product:  $t_1$  = 9.91 min (major),  $t_2$  = 13.22 min (minor), ee = 84%;

After recrystallization: Colorless solid; 60% isolated yield = 44.96 mg; HPLC (IF column, *i*-propanol/hexane = 30/70, flow rate 1.0 mL/min,  $\lambda$  = 254 nm), product:  $t_1$  = 10.62 min (major),  $t_2$  = 14.10 min (minor), ee = 92%;  $[\alpha]^{20.0}_D = -44.5$  (*c* 0.25, CH<sub>2</sub>Cl<sub>2</sub>).

## 4. Chemical kinetics studies

Kinetic profiles analyzed by <sup>1</sup>H NMR at two different concentrations. (0.05 M or 0.005M)

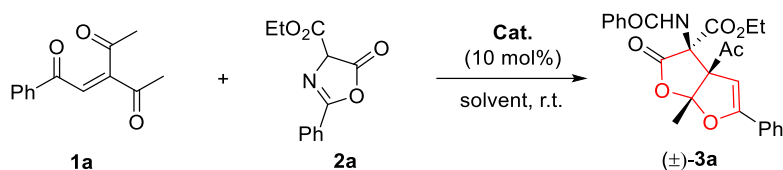

Investigation of the reaction at 0.05 M without catalyst<sup>a</sup>

| Time (min) | <b>1a</b> (%) | <b>3a</b> (%) |
|------------|---------------|---------------|
| 0          | 100           | 0             |
| 4          | 63.97695      | 23.79863      |
| 6          | 53.60231      | 27.00229      |
| 8          | 49.85591      | 38.44394      |
| 10         | 44.3804       | 44.39359      |
| 14         | 38.9049       | 52.40275      |
| 18         | 34.87032      | 54.23341      |
| 22         | 33.14121      | 54.46224      |
| 26         | 27.95389      | 55.60641      |
| 30         | 27.37752      | 58.3524       |

a) Reaction conditions: **1a** (0.05 mmol), **2a** (0.05 mmol.), solvent (1 mL), and at room temperature (r.t.).

Investigation of the reaction at 0.05 M with **CPA-7** (10 mol%)<sup>a</sup>

| Time (min) | <b>1a</b> (%) | <b>3a</b> (%) |
|------------|---------------|---------------|
| 0          | 100           | 0             |
| 4          | 71.19705      | 23.054755     |
| 6          | 64.95973      | 26.224784     |
| 8          | 55.93524      | 31.700288     |
| 10         | 51.04975      | 35.158501     |
| 14         | 49.75675      | 40.92219      |
| 18         | 44.85126      | 42.651297     |
| 22         | 43.47826      | 48.126801     |
| 26         | 41.48876      | 50.144092     |
| 30         | 40.06577      | 51.585014     |

a) Reaction conditions: **1a** (0.05 mmol), **2a** (0.05 mmol.), **CPA-7** (10 mol%), solvent (1 mL), and at room temperature (r.t.).

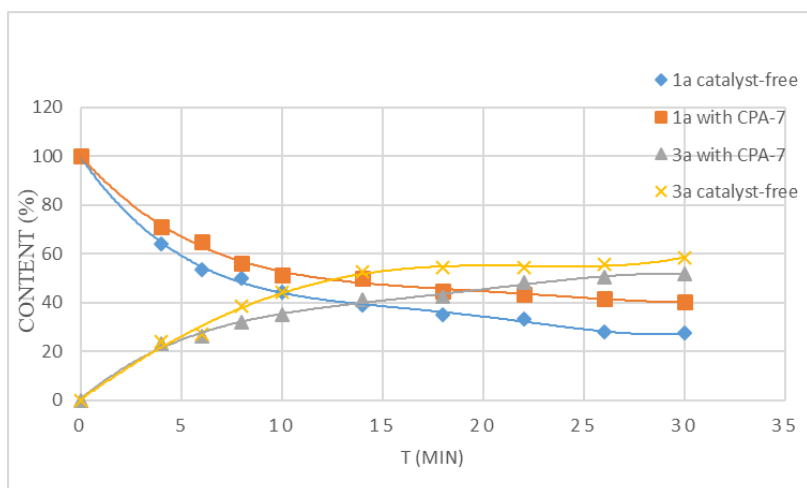

**Figure S1.** Kinetic profiles analyzed by  $^1\text{H}$  NMR at the concentration of  $0.05\text{ M}^{\text{a}}$ .

- a) Reaction conditions: **1a** ( $0.05\text{ mmol}$ ), **2a** ( $0.05\text{ mmol}$ ), solvent ( $1\text{ mL}$ ), catalyst-free or **CPA-7** ( $10\text{ mol\%}$ ), and at room temperature (r.t.).

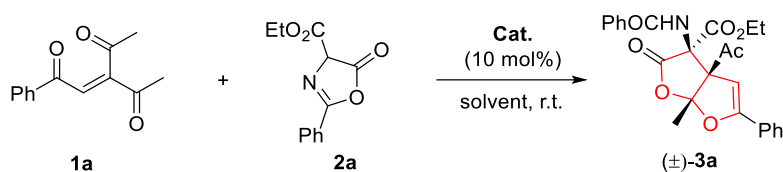

Investigation of the reaction at  $0.005\text{ M}$  without catalyst<sup>a</sup>

| Time (min) | 1a (%)   | 3a (%)   |
|------------|----------|----------|
| 0          | 100      | 0        |
| 8          | 83.39483 | 23.98524 |
| 16         | 77.12177 | 27.67528 |
| 24         | 69.37269 | 31.73432 |
| 32         | 67.52768 | 35.42435 |
| 40         | 61.25461 | 40.2214  |
| 48         | 58.67159 | 41.32841 |
| 56         | 56.08856 | 42.06642 |

- a) Reaction conditions: **1a** ( $0.005\text{ mmol}$ ), **2a** ( $0.005\text{ mmol}$ ), solvent ( $1\text{ mL}$ ), and at room temperature r.t.).

Investigation of the reaction at  $0.005\text{ M}$  with **CPA-7** ( $10\text{ mol\%}$ )<sup>a</sup>

| Time (min) | 1a (%)   | 3a (%)   |
|------------|----------|----------|
| 0          | 100      | 0        |
| 8          | 71.16705 | 23.79863 |
| 16         | 64.75973 | 27.00229 |
| 24         | 55.83524 | 38.44394 |
| 32         | 51.02975 | 44.39359 |

|    |          |          |
|----|----------|----------|
| 40 | 49.65675 | 52.40275 |
| 48 | 41.41876 | 55.60641 |
| 56 | 40.04577 | 58.3524  |

- a) Reaction conditions: **1a** (0.005 mmol), **2a** (0.005 mmol.), **CPA-7** (10 mol%), solvent (1 mL), and at room temperature (r.t.).

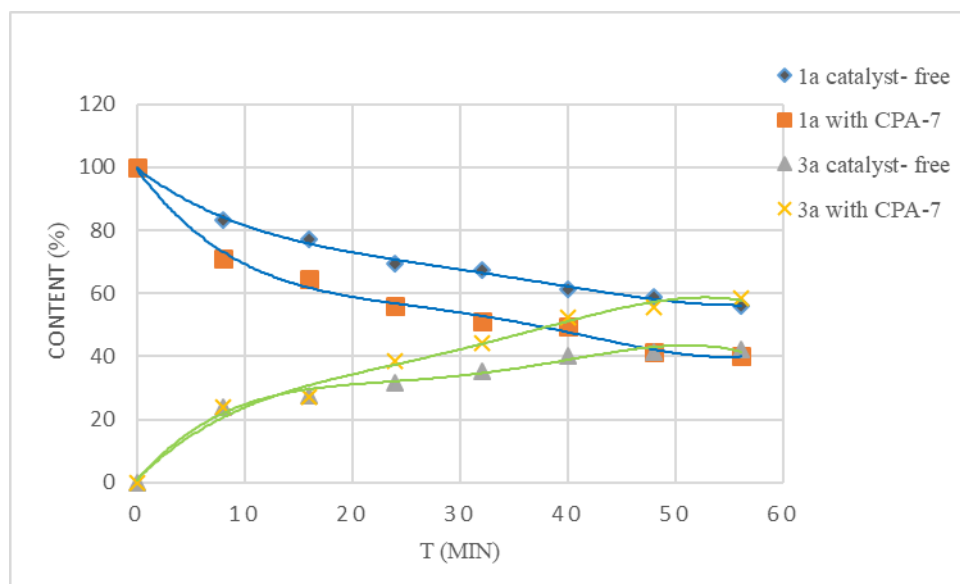

**Figure S2.** Kinetic profiles analyzed by  $^1\text{H}$  NMR at the concentration of 0.005 M<sup>a</sup>

- a) Reaction conditions: **1a** (0.005 mmol), **2a** (0.005 mmol.), solvent (1 mL), catalyst-free or CPA-7 (10mol%), and at room temperature (r.t.).

## 5. X-ray single crystal data for compounds (-)-3l

Compound : (-)-3l

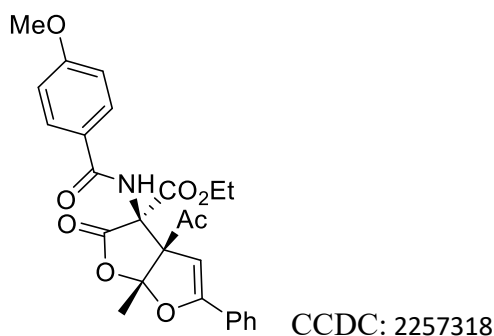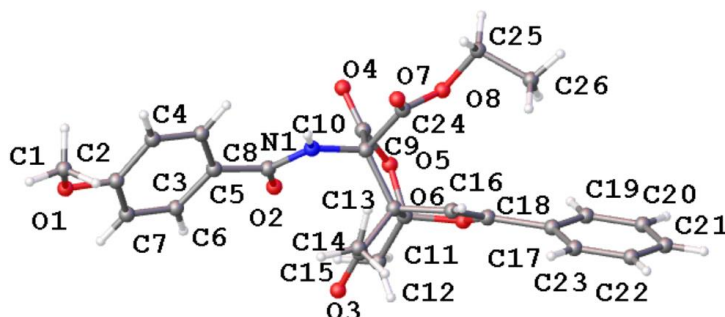

|                                    |                                                 |
|------------------------------------|-------------------------------------------------|
| Identification code                | 230318LU_LGPZ144707_0m                          |
| Empirical formula                  | C <sub>26</sub> H <sub>25</sub> NO <sub>8</sub> |
| Formula weight                     | 479.47                                          |
| Temperature/K                      | 193.00                                          |
| Crystal system                     | orthorhombic                                    |
| Space group                        | P2 <sub>1</sub> 2 <sub>1</sub> 2 <sub>1</sub>   |
| a/Å                                | 7.6044(5)                                       |
| b/Å                                | 9.6671(6)                                       |
| c/Å                                | 31.908(2)                                       |
| α/°                                | 90                                              |
| β/°                                | 90                                              |
| γ/°                                | 90                                              |
| Volume/Å <sup>3</sup>              | 2345.6(3)                                       |
| Z                                  | 4                                               |
| ρ <sub>calc</sub> /cm <sup>3</sup> | 1.358                                           |
| μ/mm <sup>-1</sup>                 | 0.538                                           |
| F(000)                             | 1008.0                                          |
| Crystal size/mm <sup>3</sup>       | 0.13 × 0.12 × 0.1                               |
| Radiation                          | GaKα (λ = 1.34139)                              |

2 $\Theta$  range for data collection/° 8.314 to 120.906  
Index ranges -9 ≤ h ≤ 9, -11 ≤ k ≤ 12, -40 ≤ l ≤ 41  
Reflections collected 39600  
Independent reflections 5280 [R<sub>int</sub> = 0.0634, R<sub>sigma</sub> = 0.0324]  
Data/restraints/parameters 5280/71/391  
Goodness-of-fit on F<sup>2</sup> 1.091  
Final R indexes [I ≥ 2σ (I)] R<sub>1</sub> = 0.0521, wR<sub>2</sub> = 0.1154  
Final R indexes [all data] R<sub>1</sub> = 0.0623, wR<sub>2</sub> = 0.1214  
Largest diff. peak/hole / e Å<sup>-3</sup> 0.17/-0.22  
Flack parameter 0.18(14)



## 6. NMR Spectra

(±)-3a

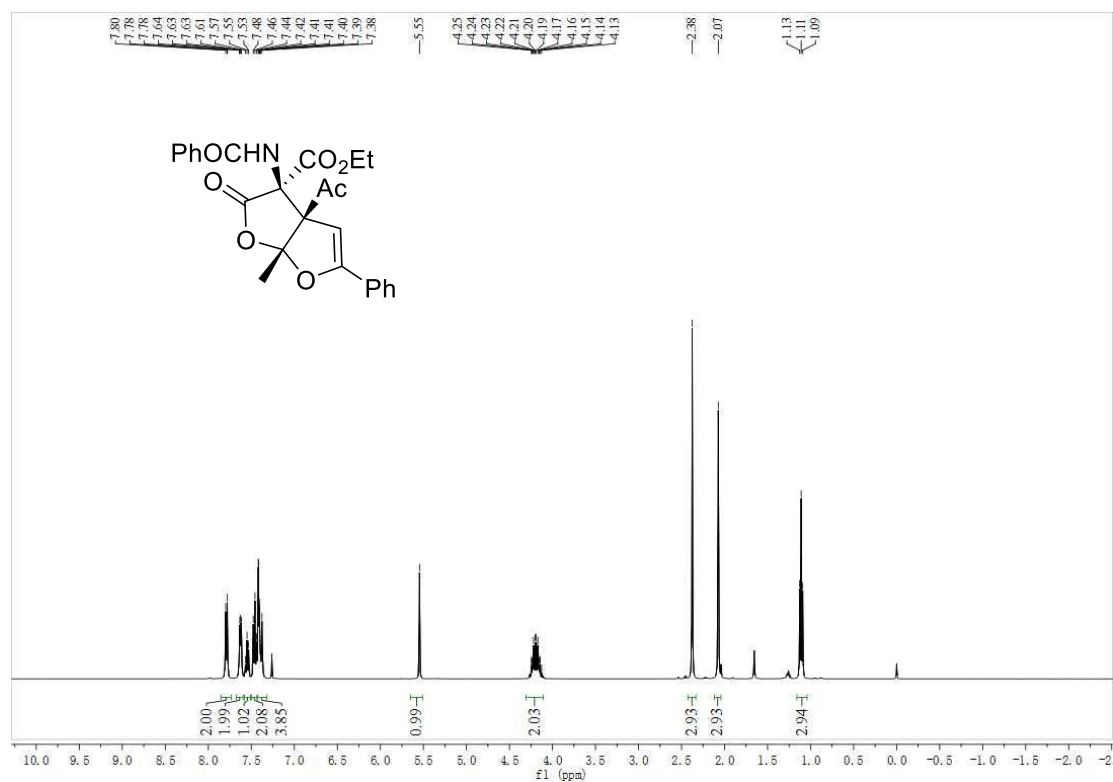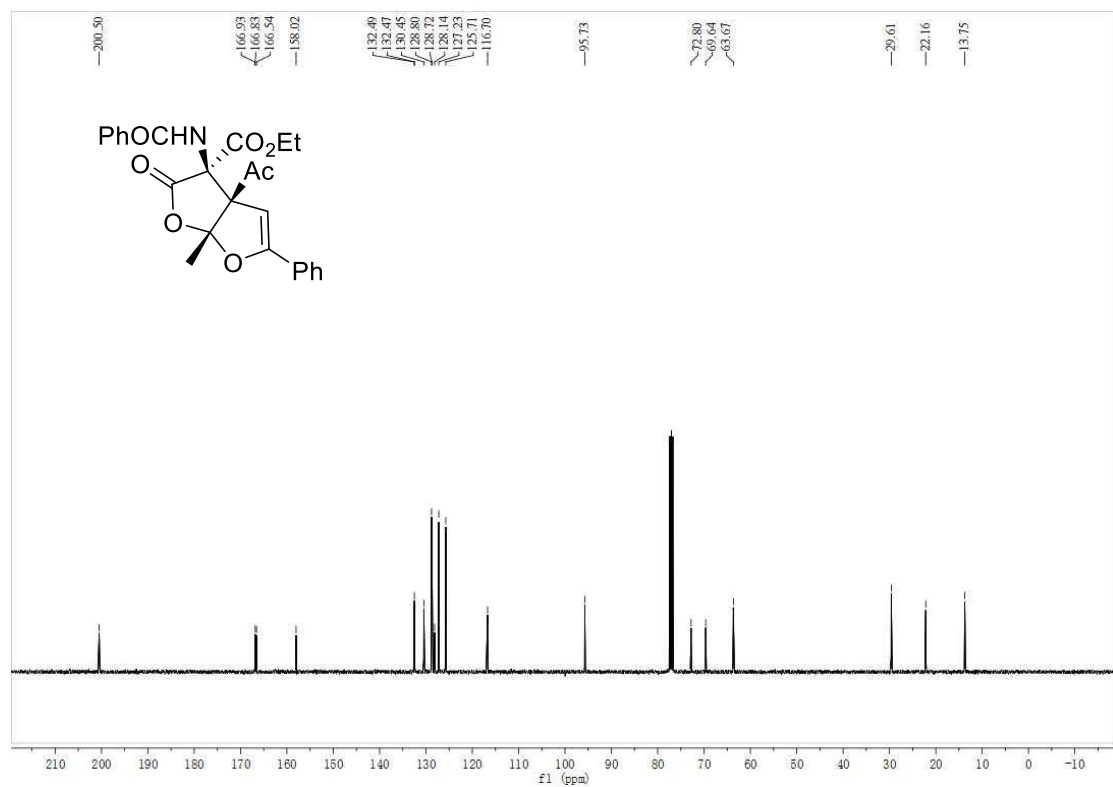

(±)-3b

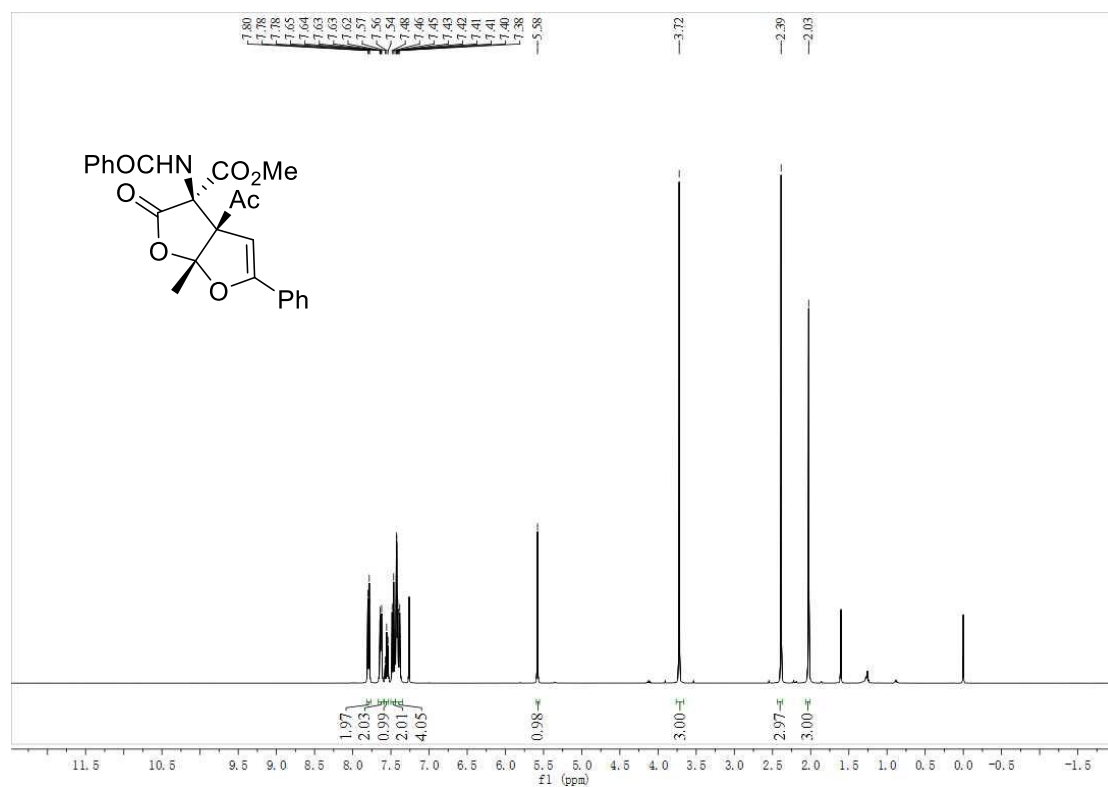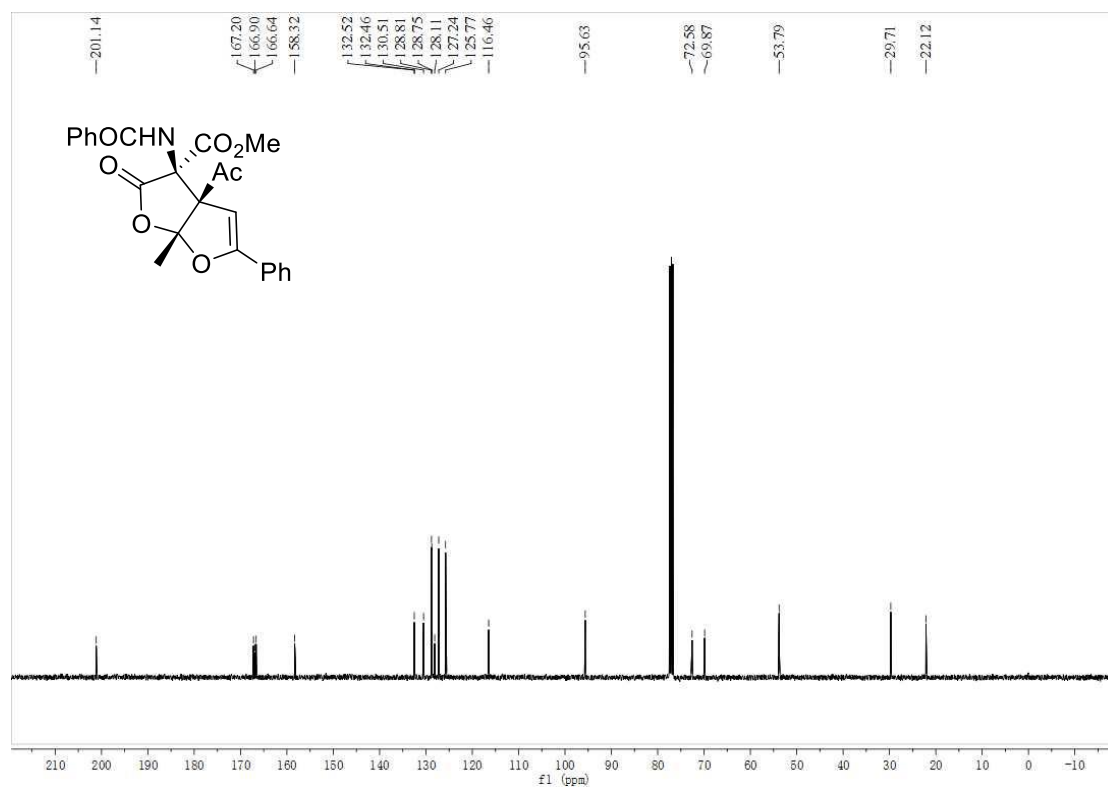

(±)-3c

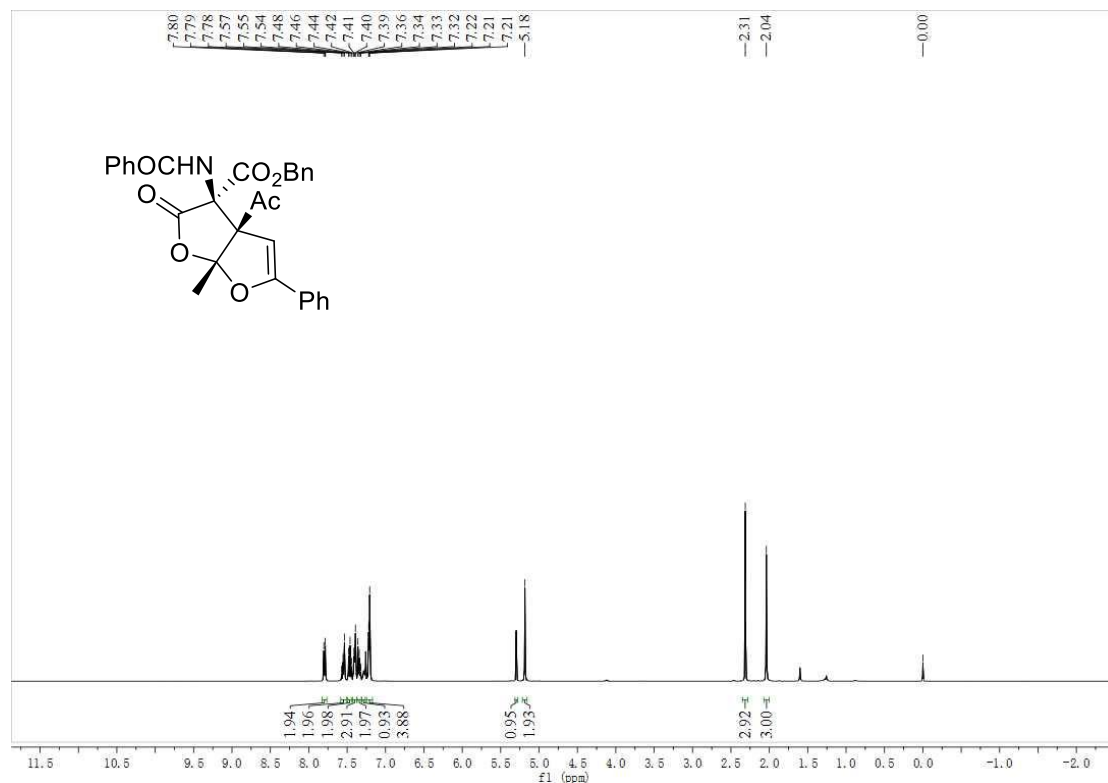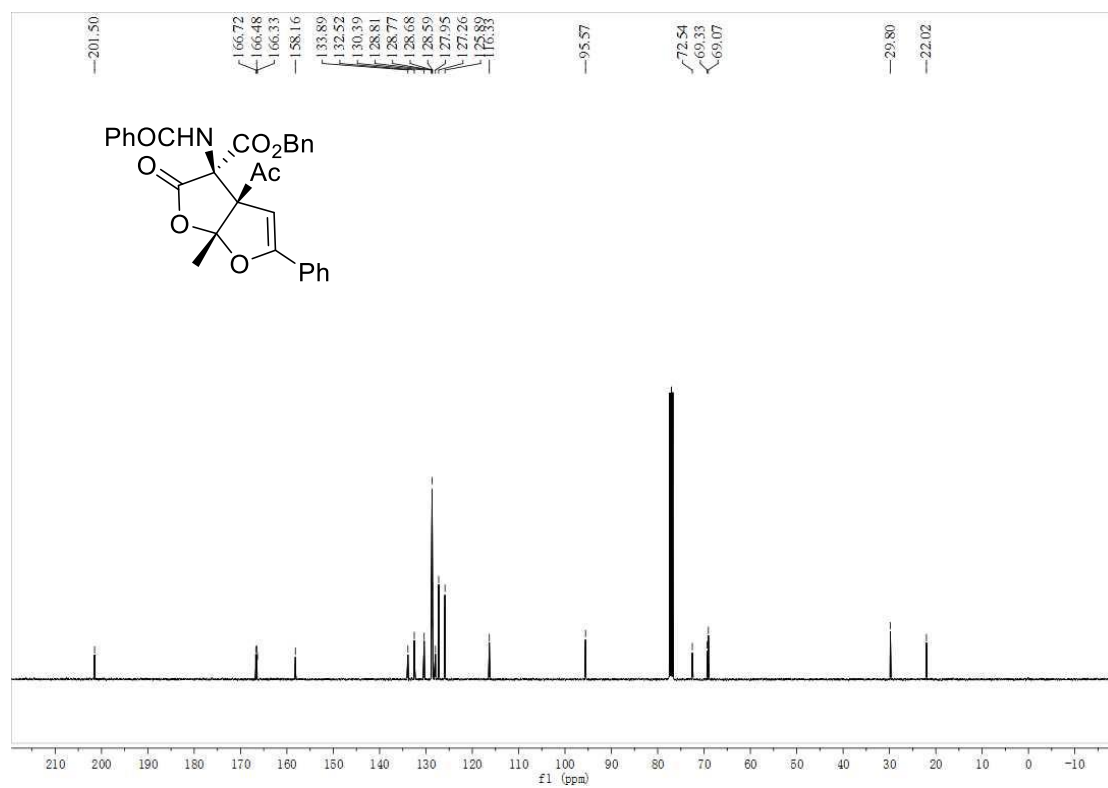

(±)-3d

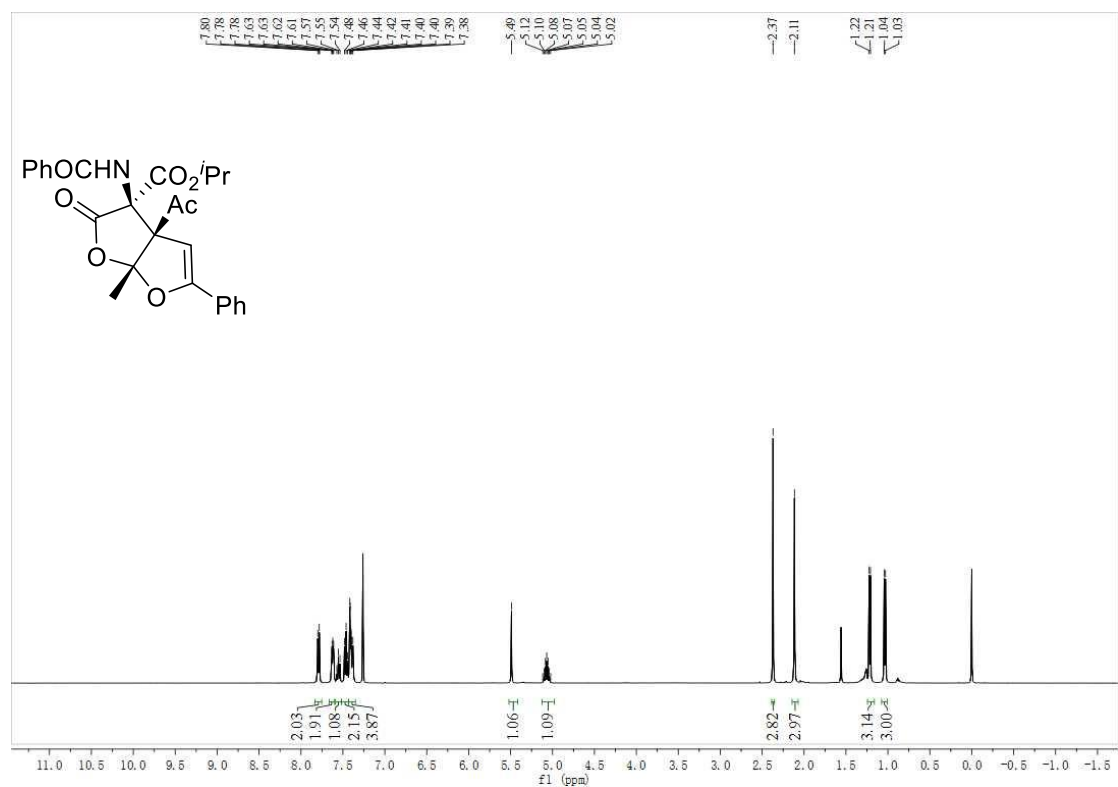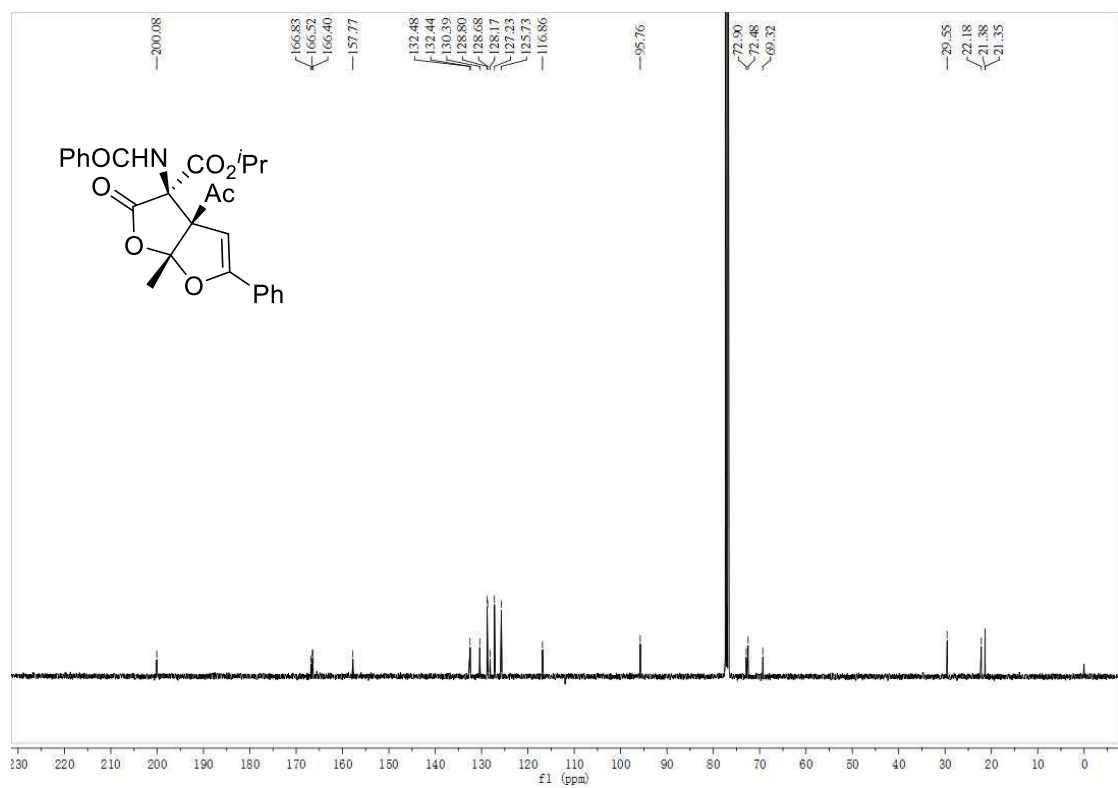

(±)-3e

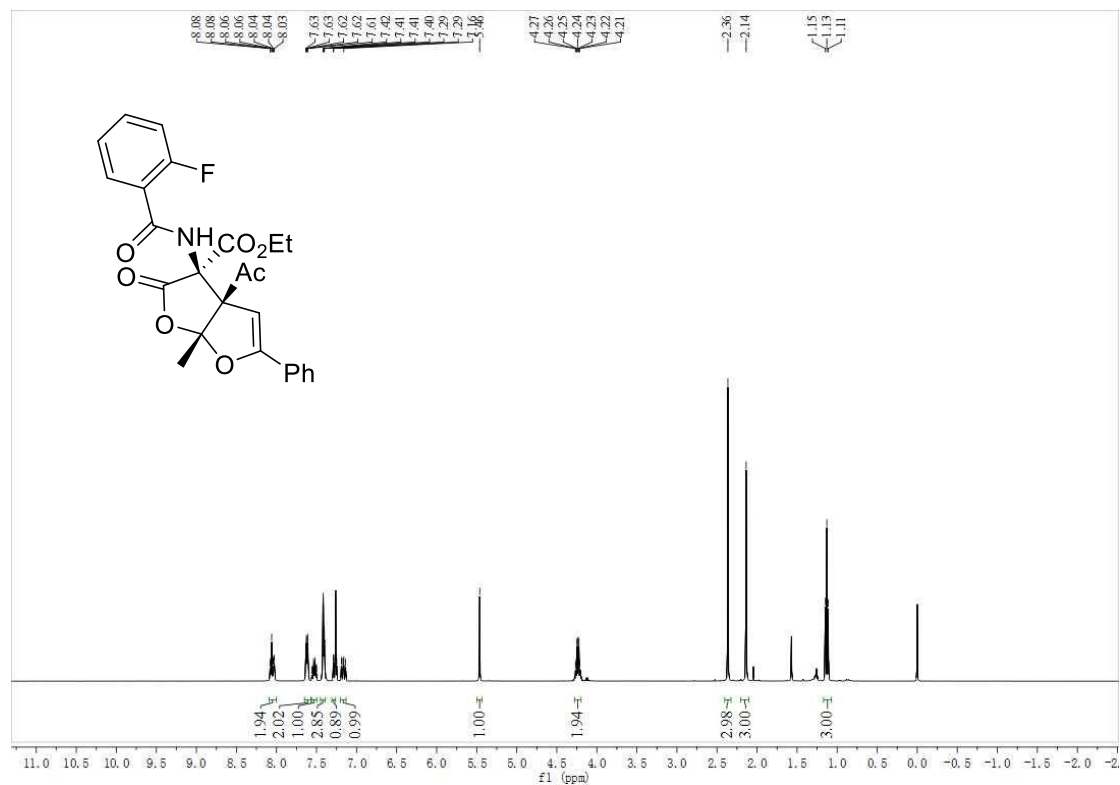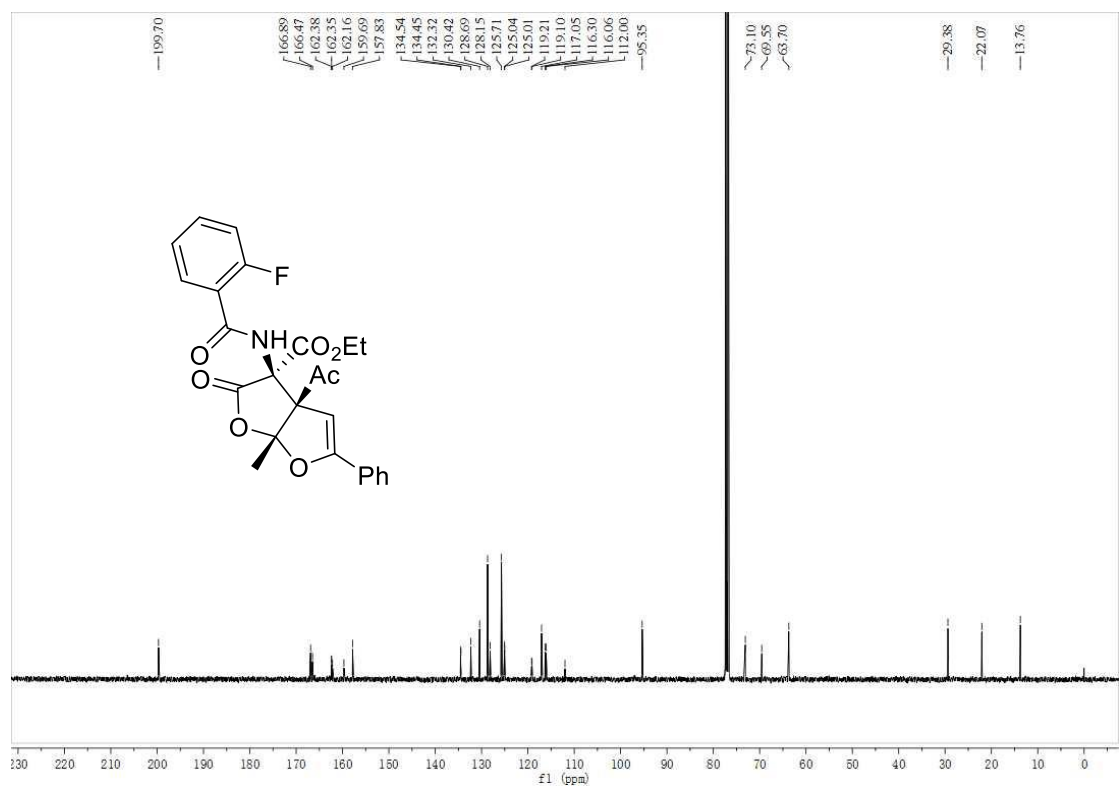

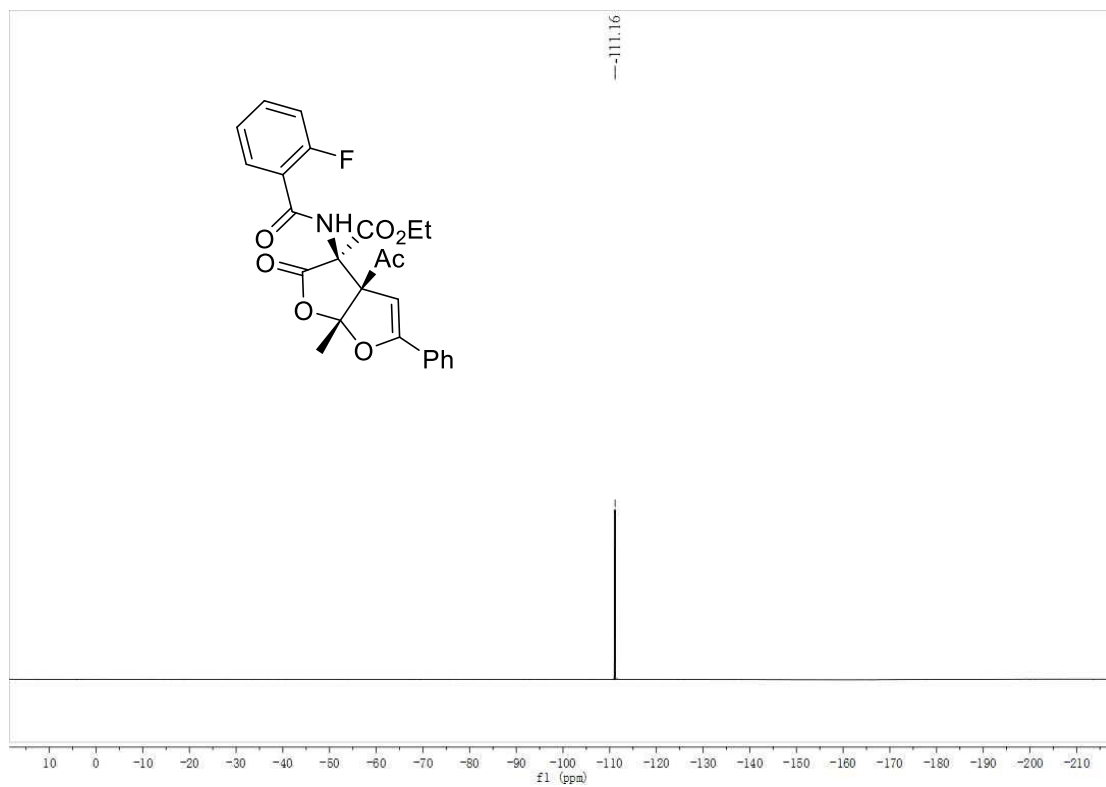

(±)-3f

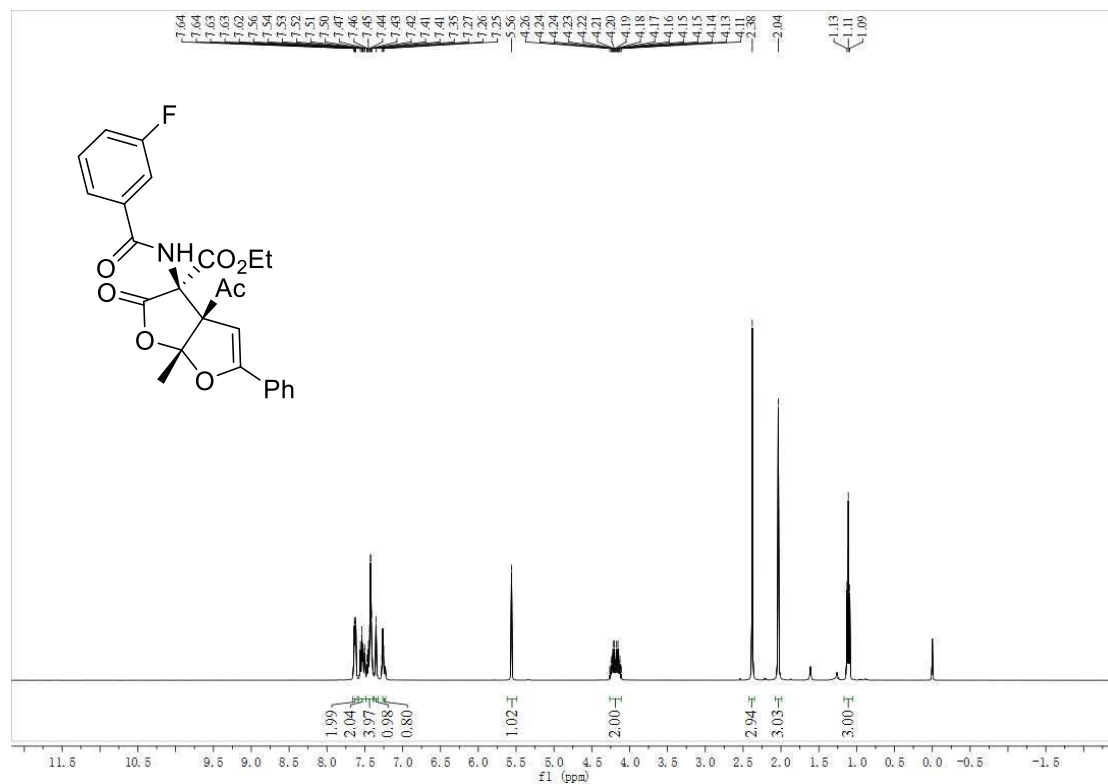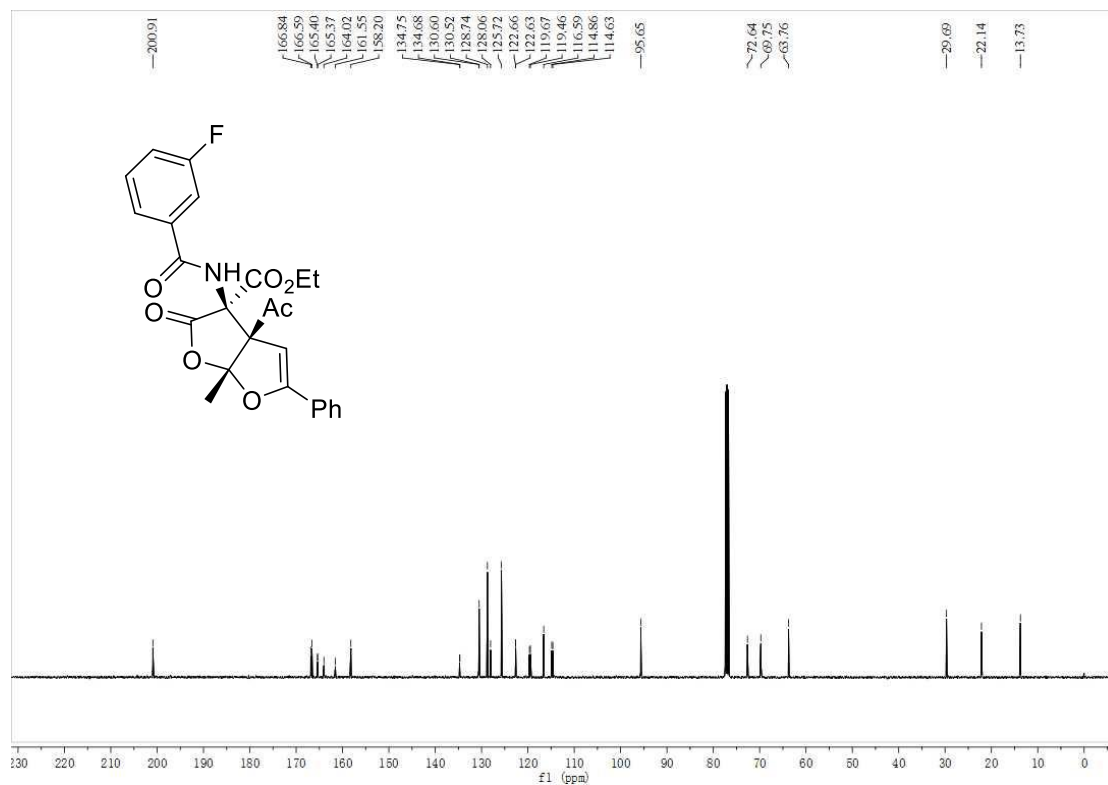

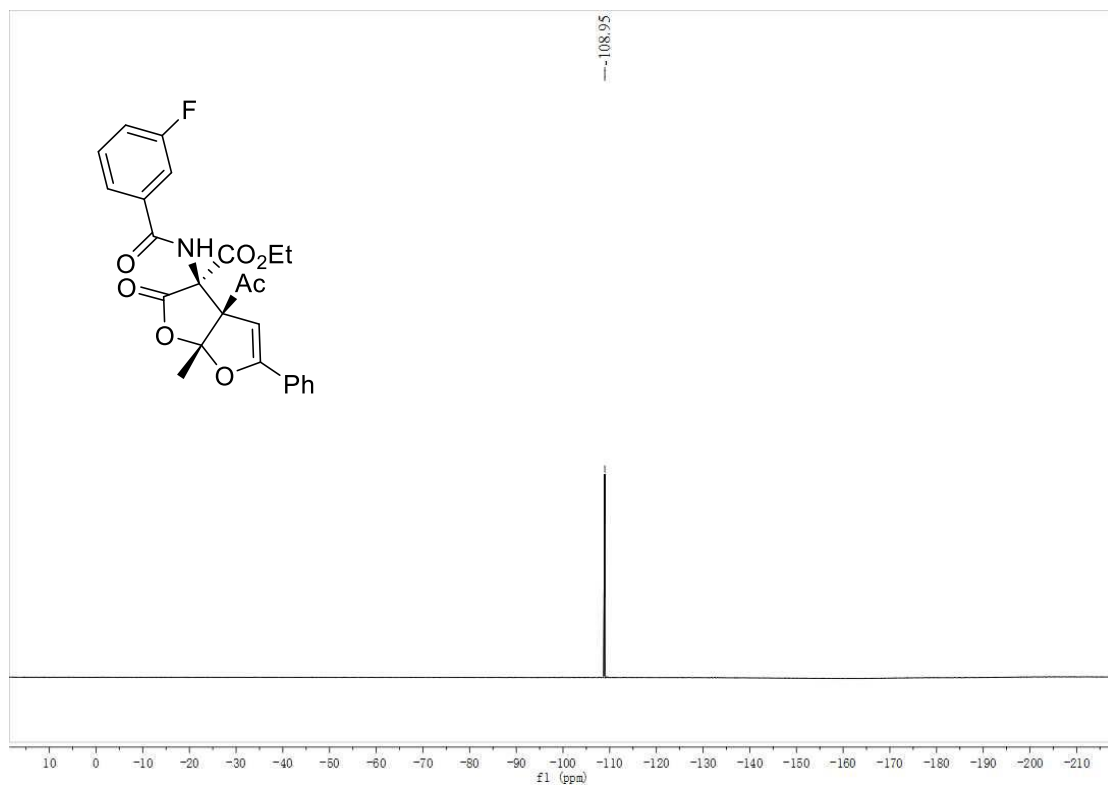



(±)-3g

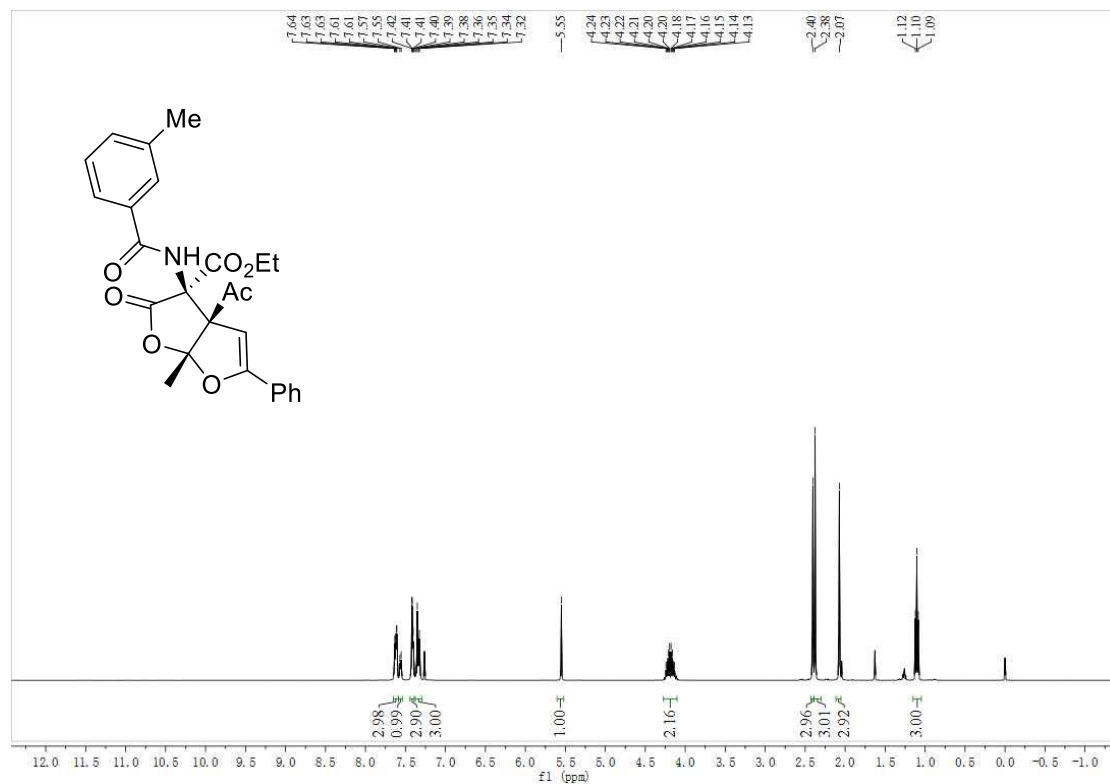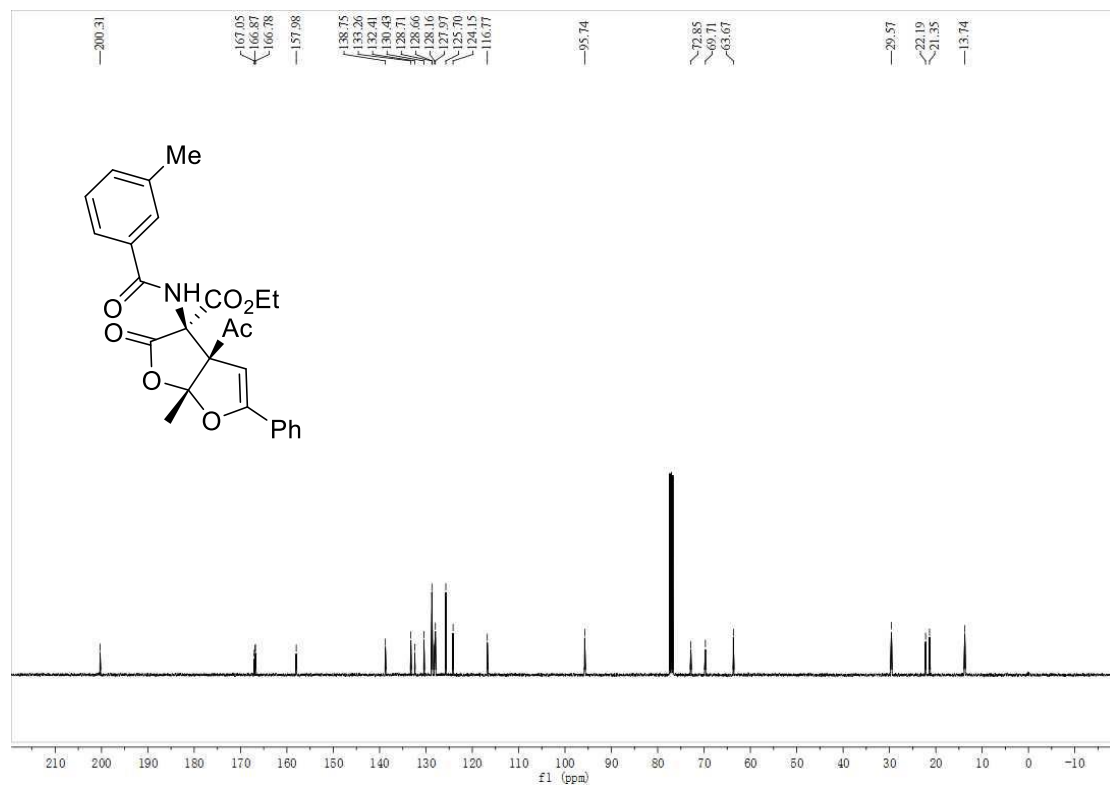

(±)-3h

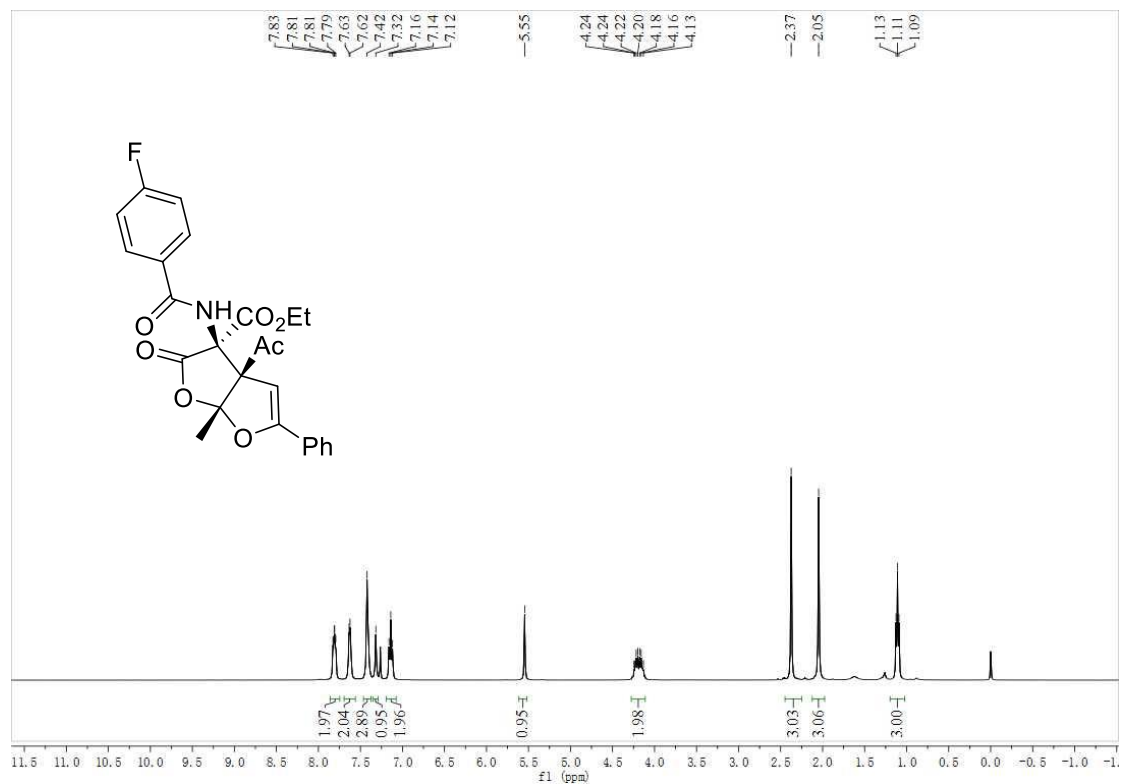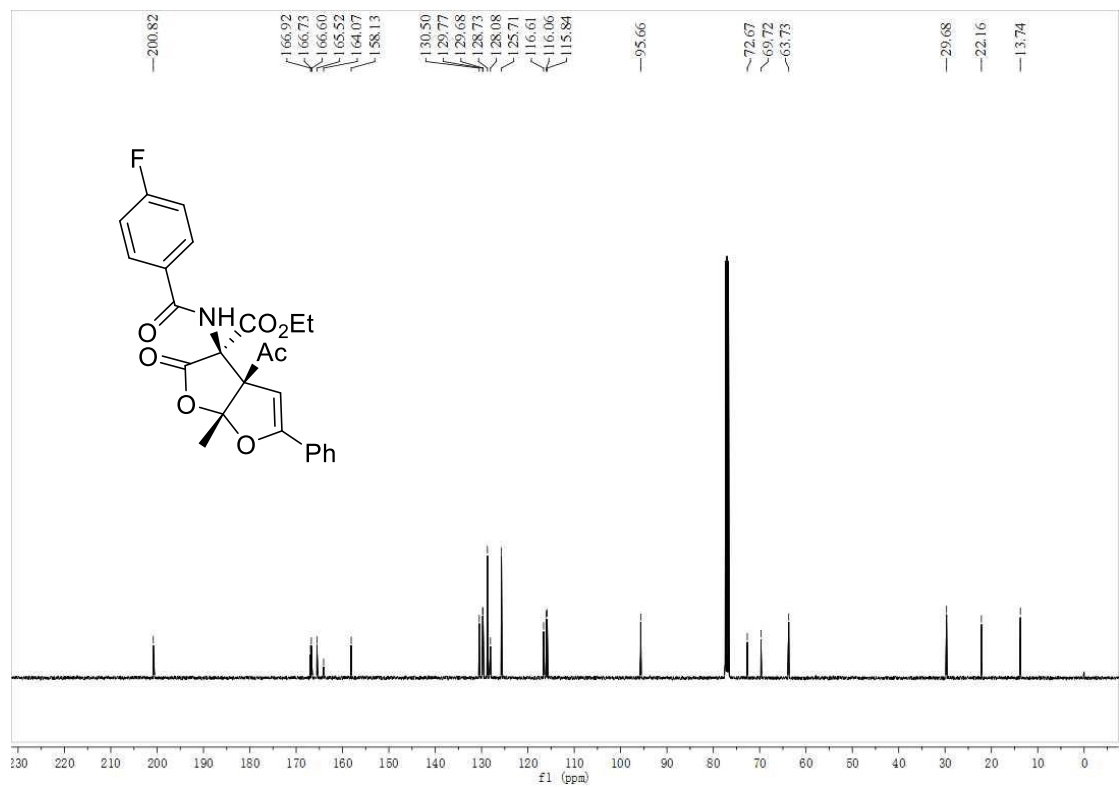

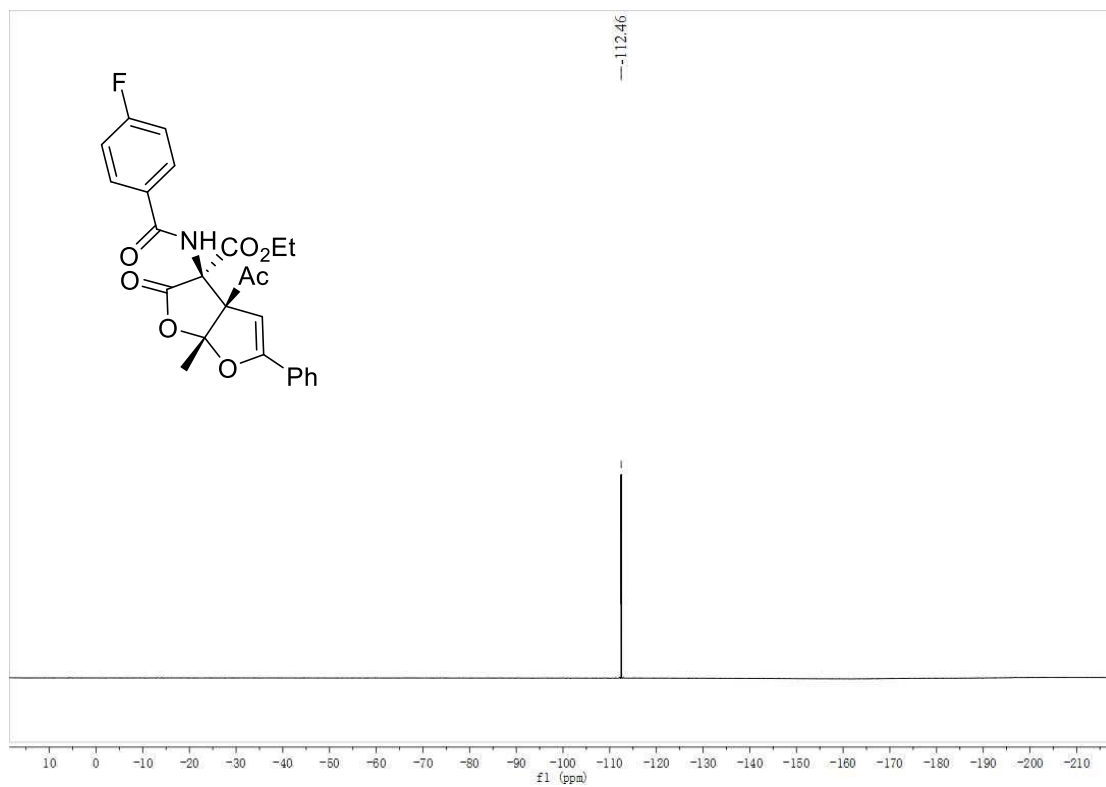

(±)-3i

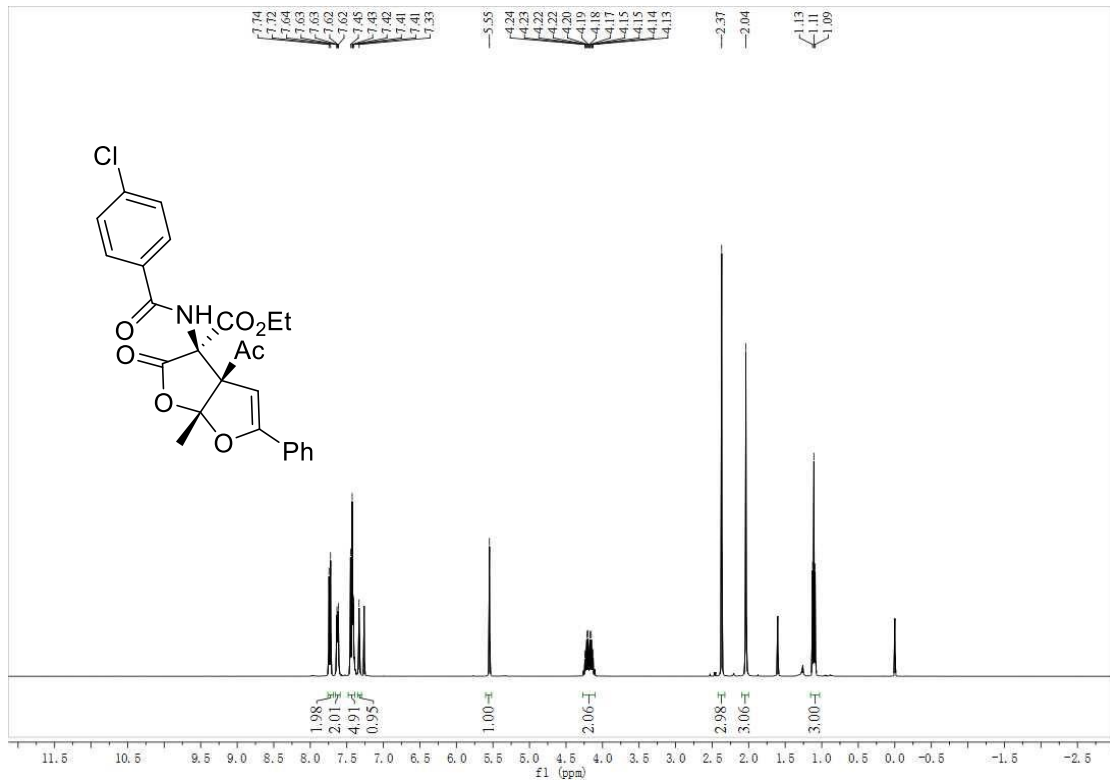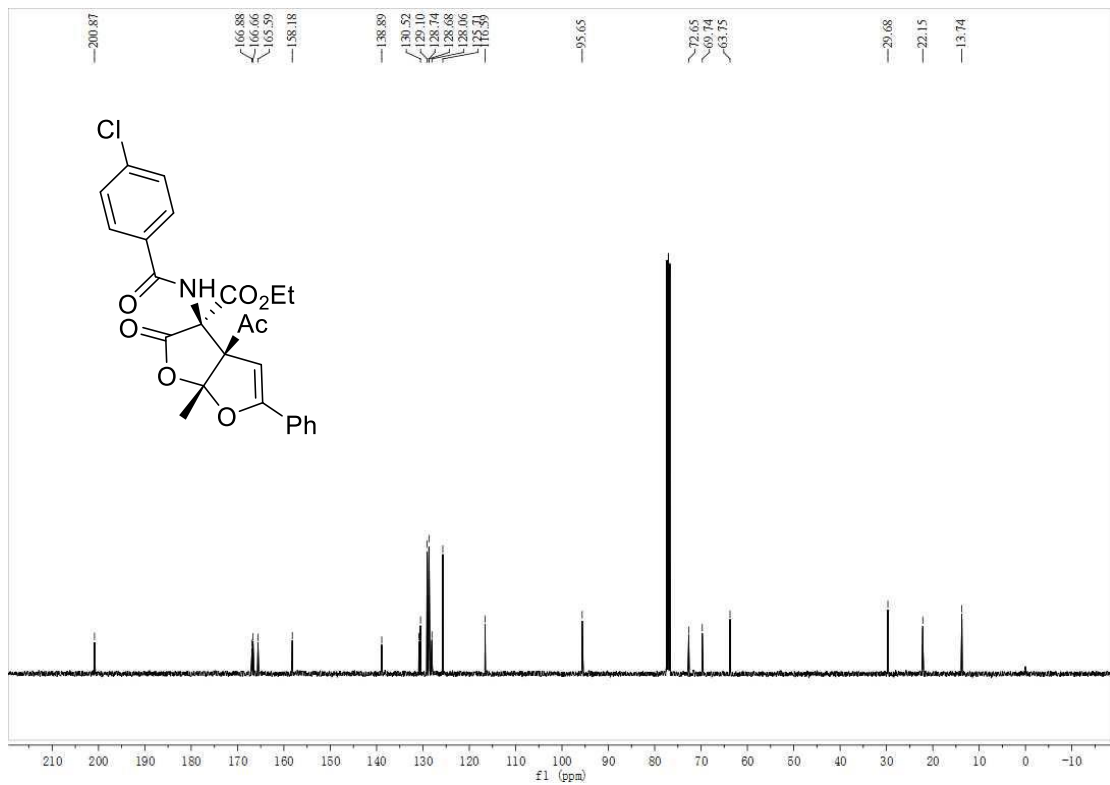

(±)-3j

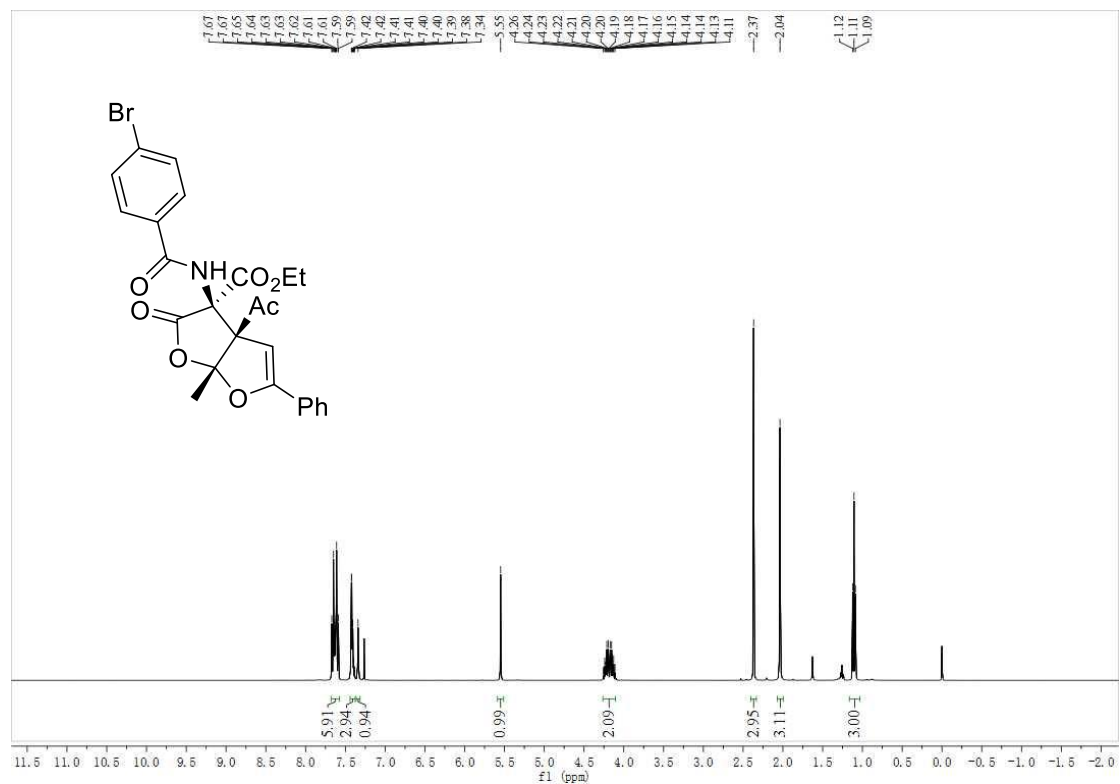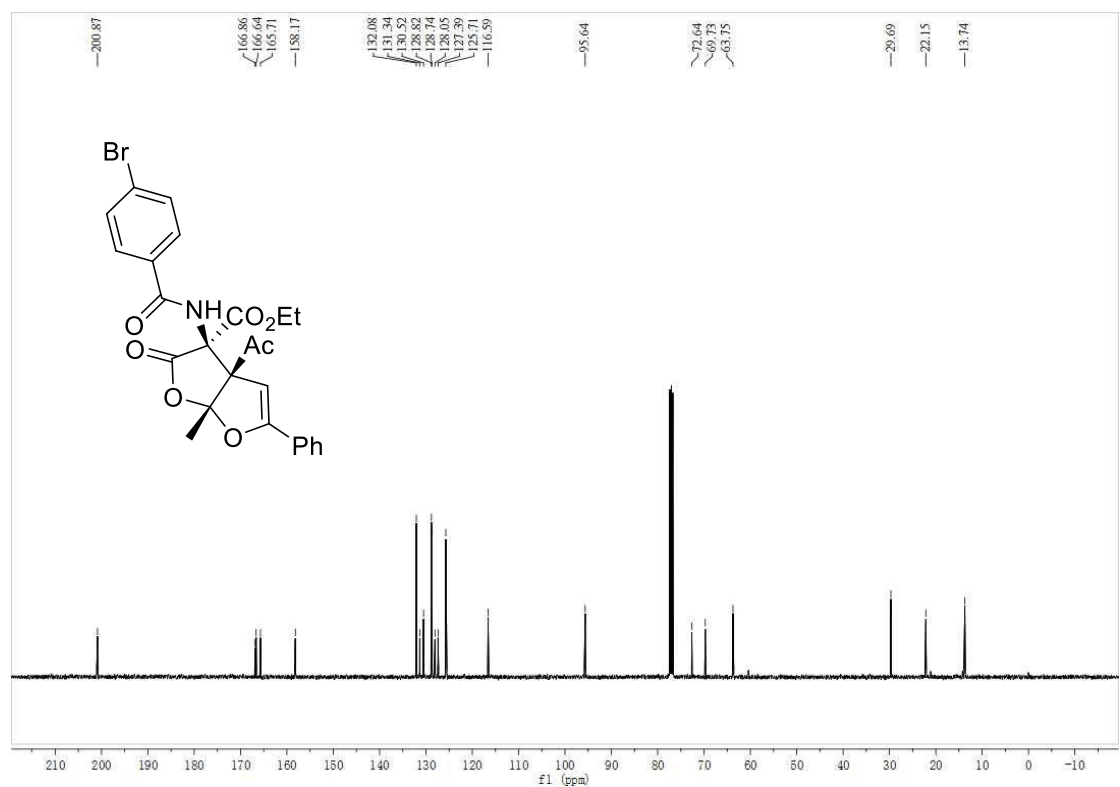

(±)-3k

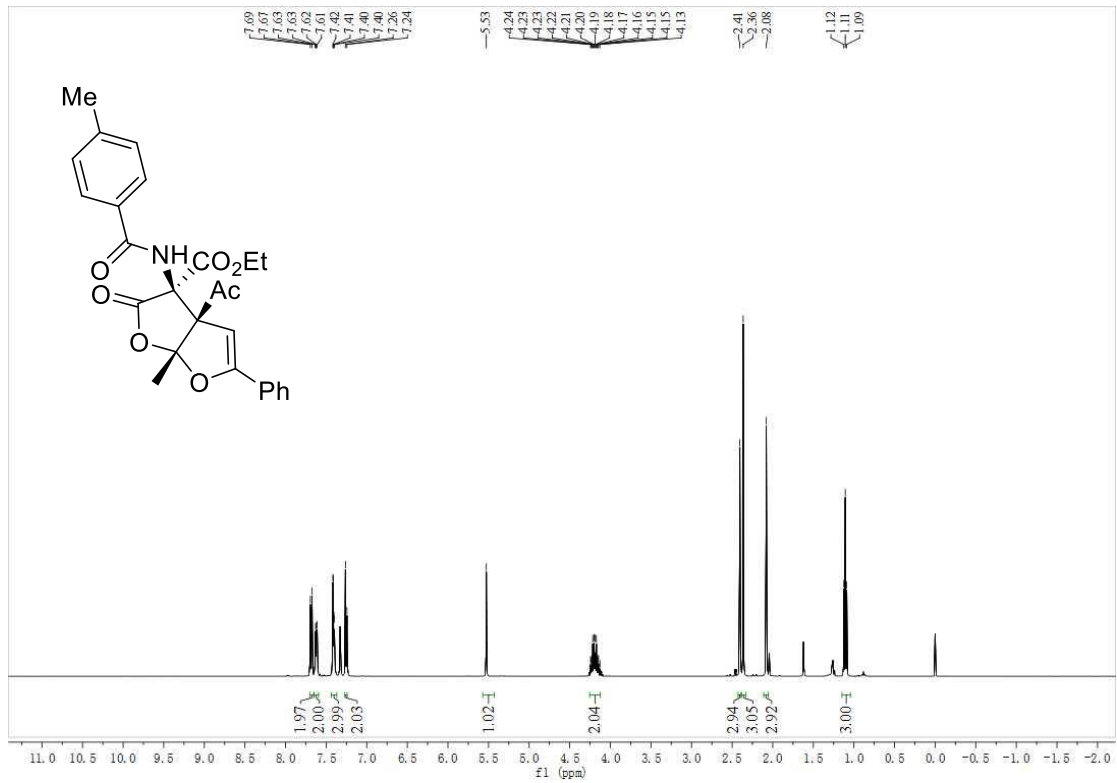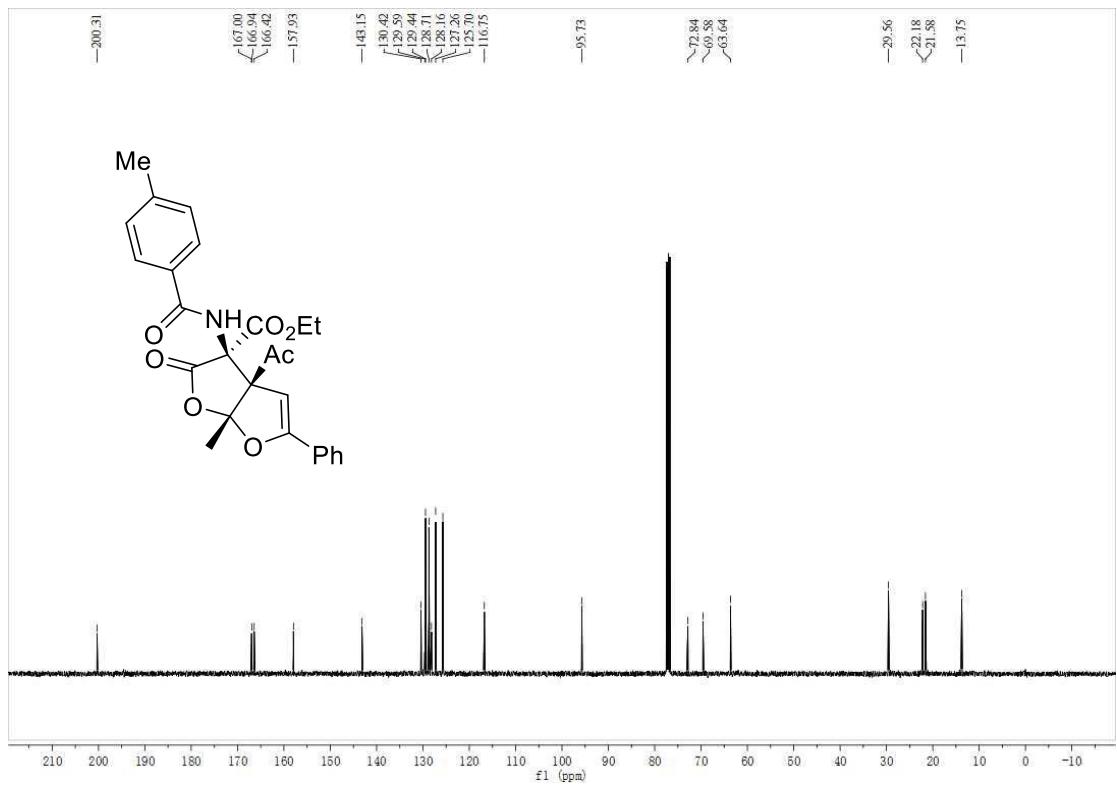

(±)-3I

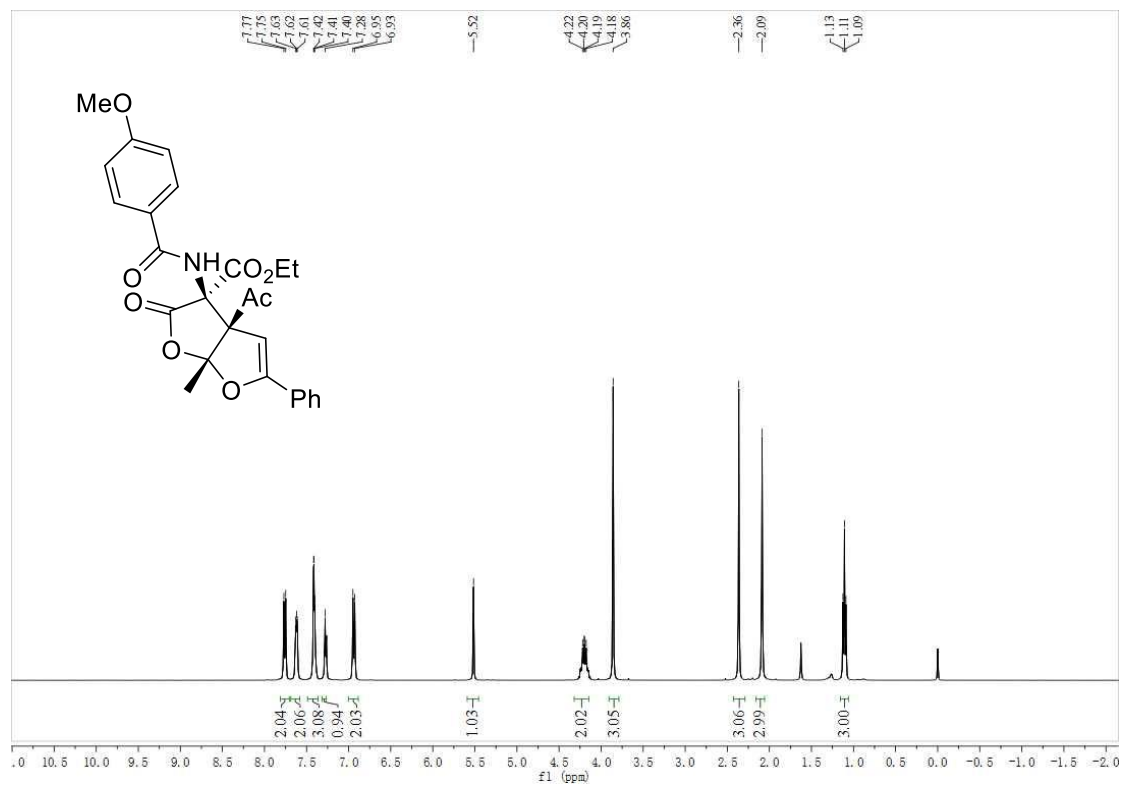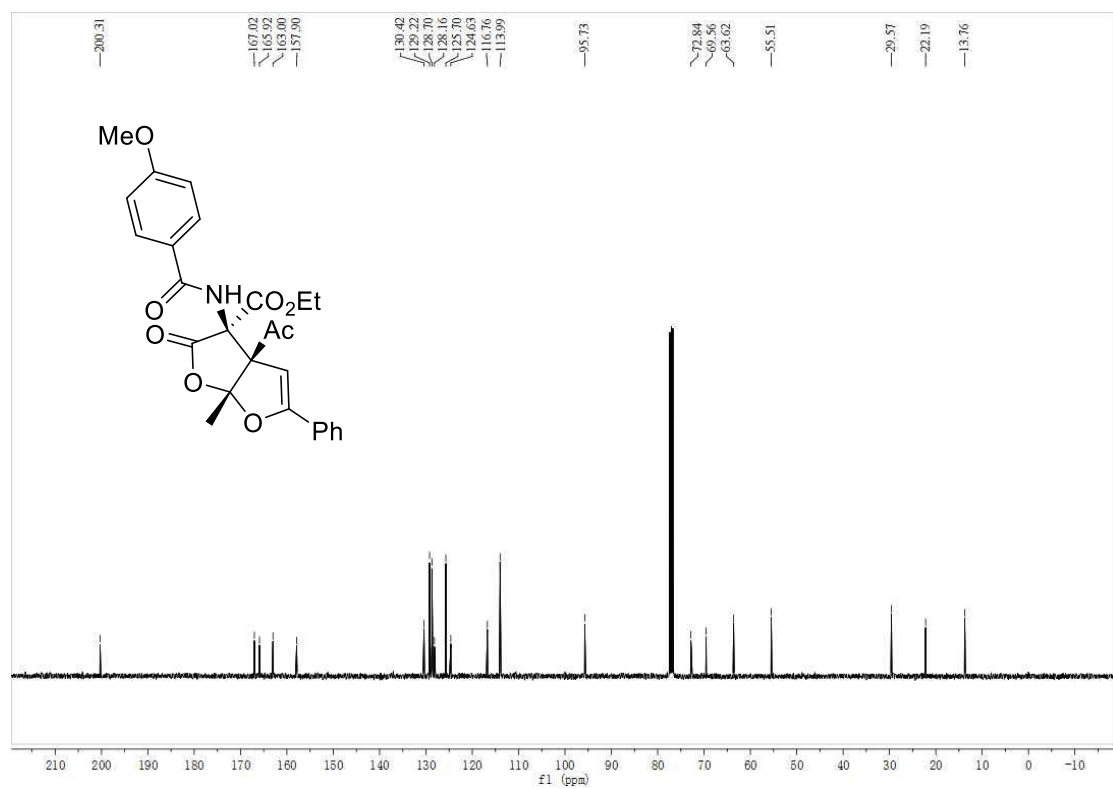

(±)-3m

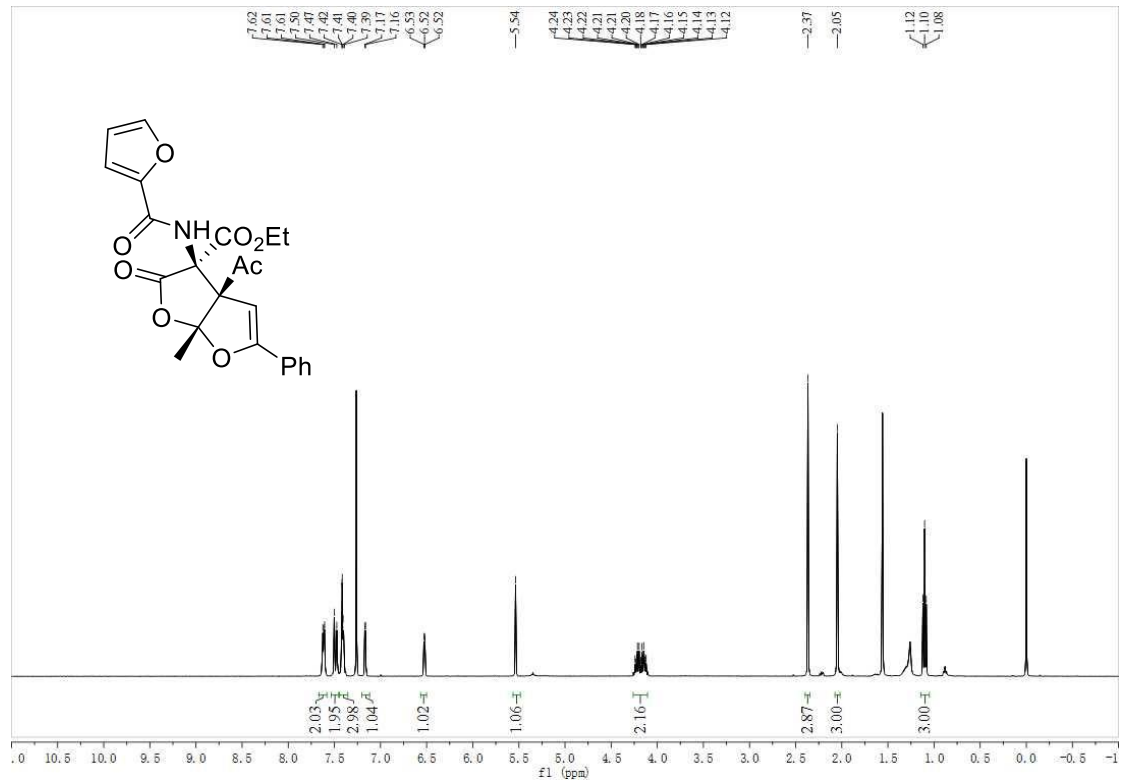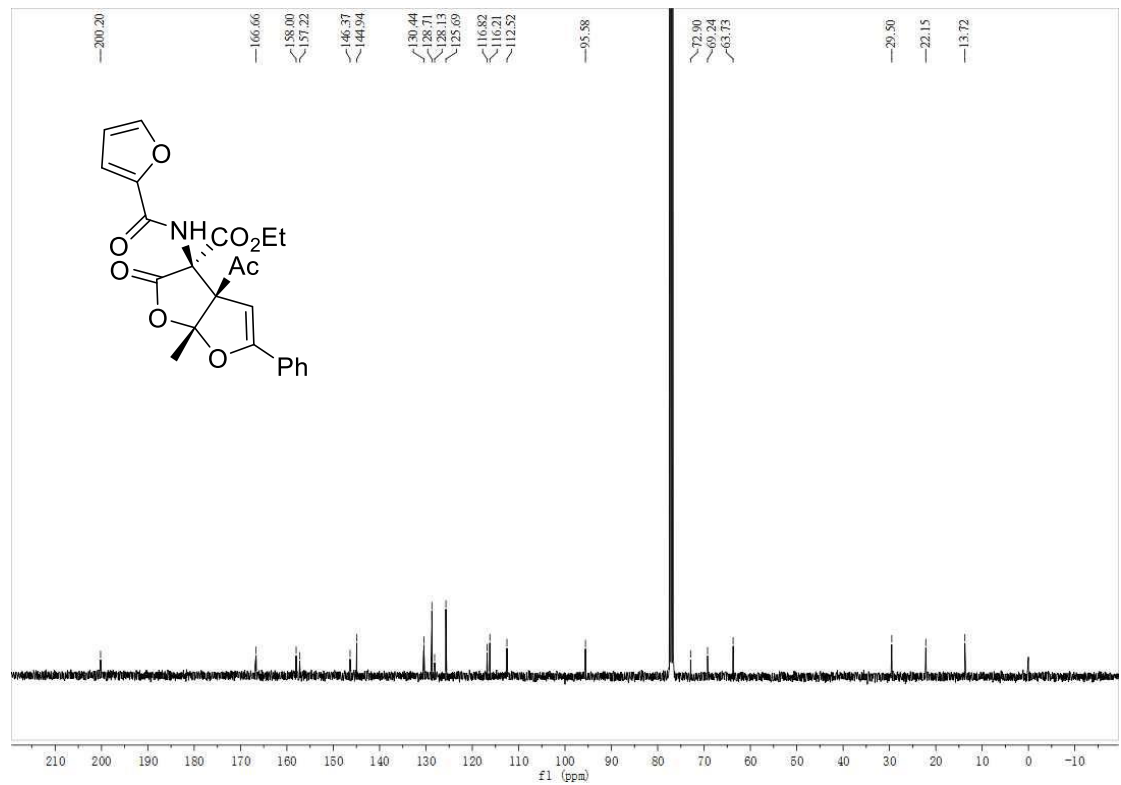



(±)-3n

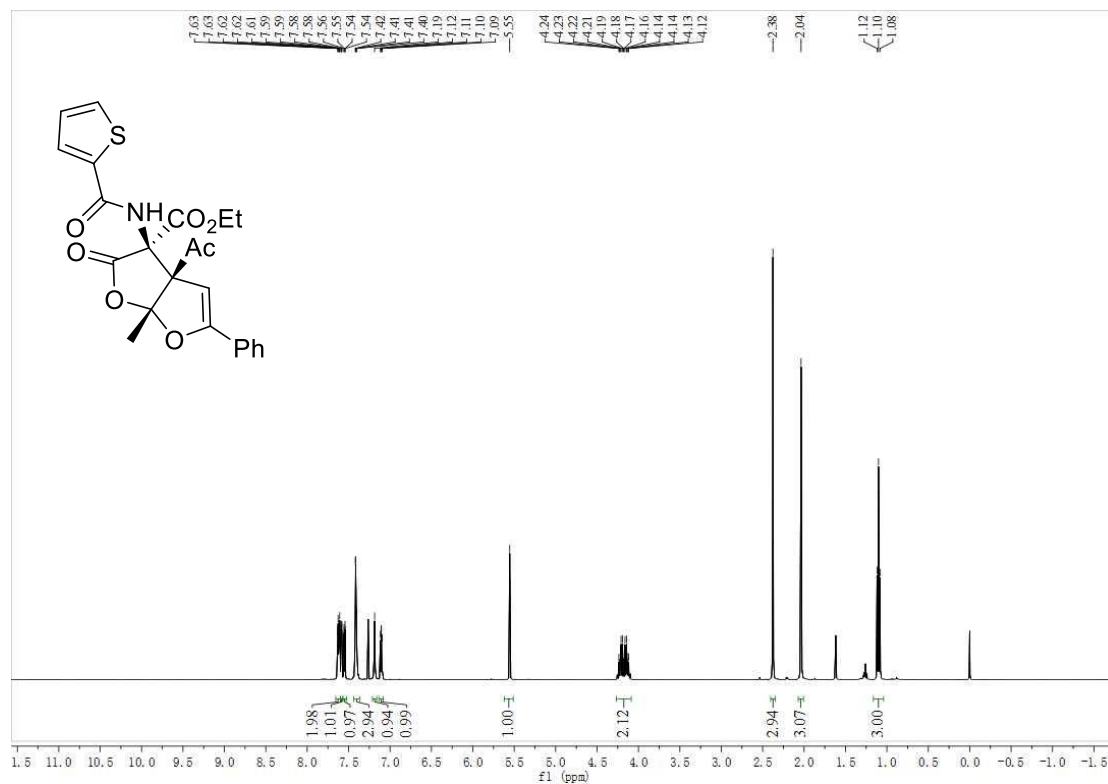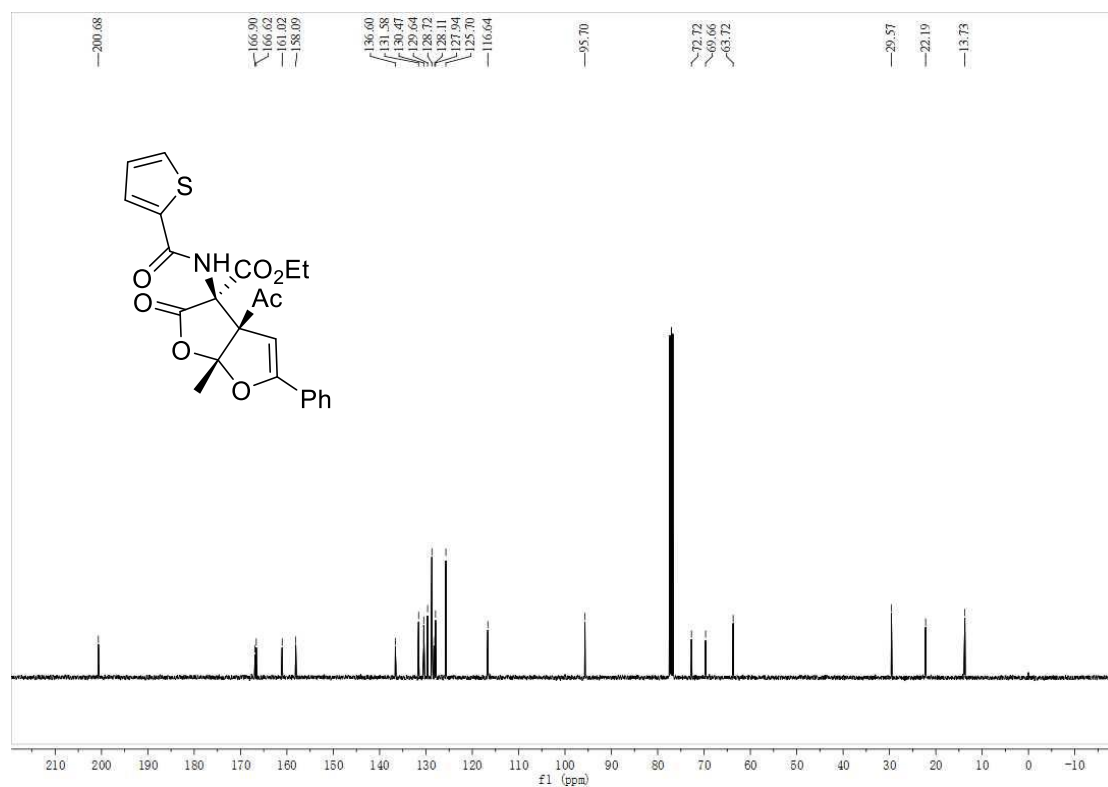

(±)-30

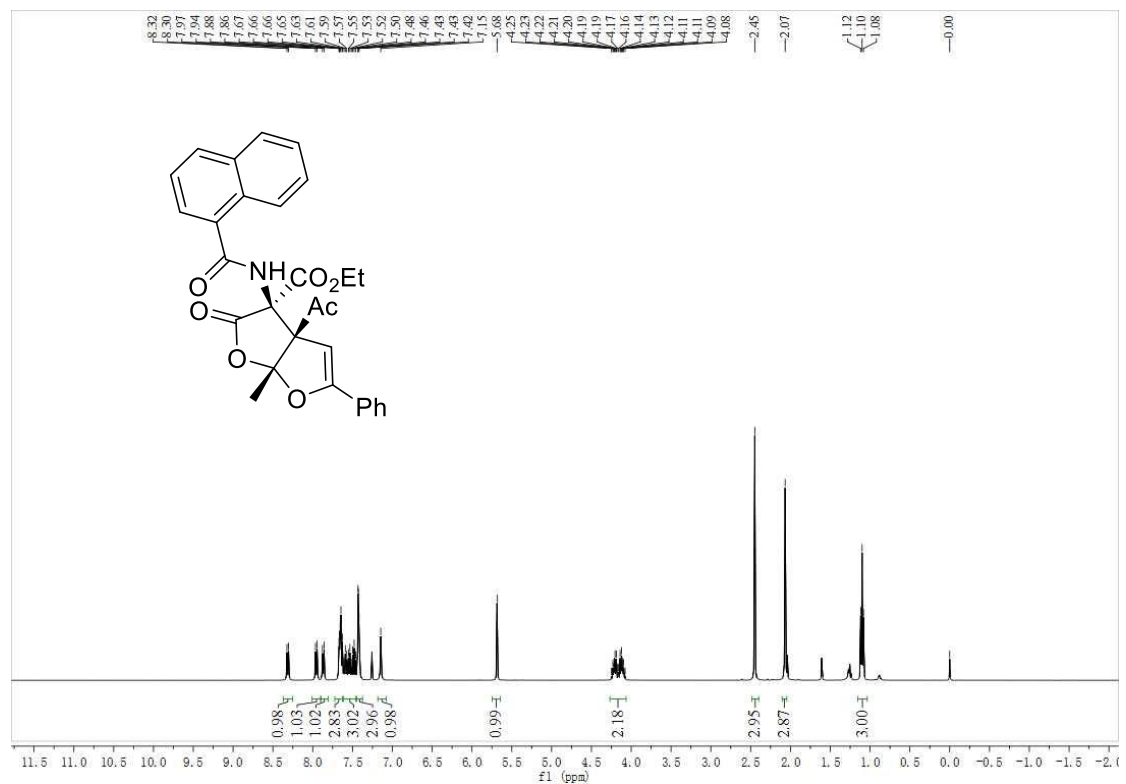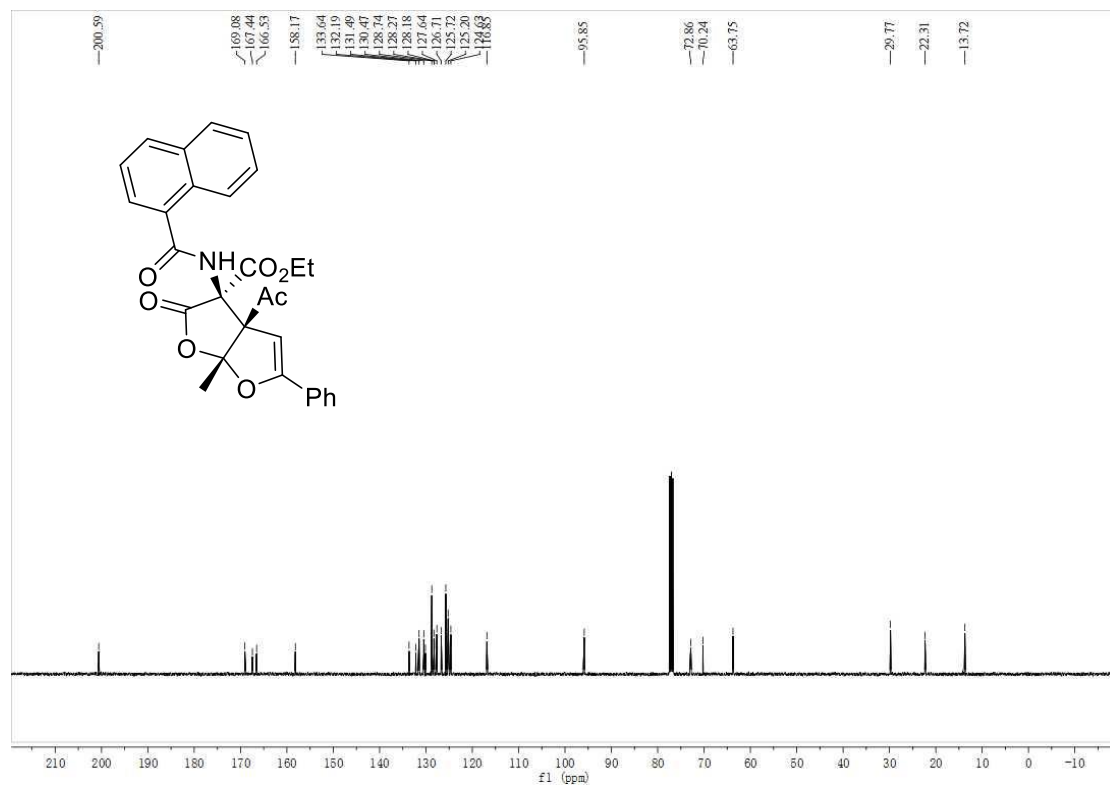

(±)-3p

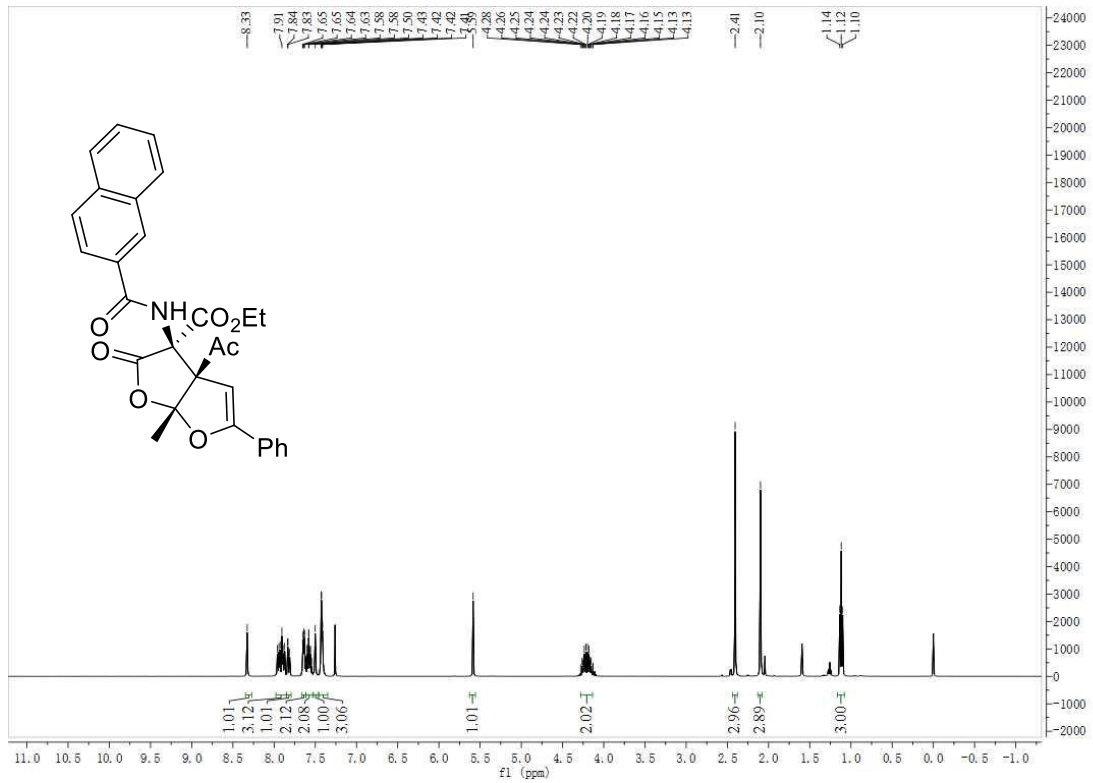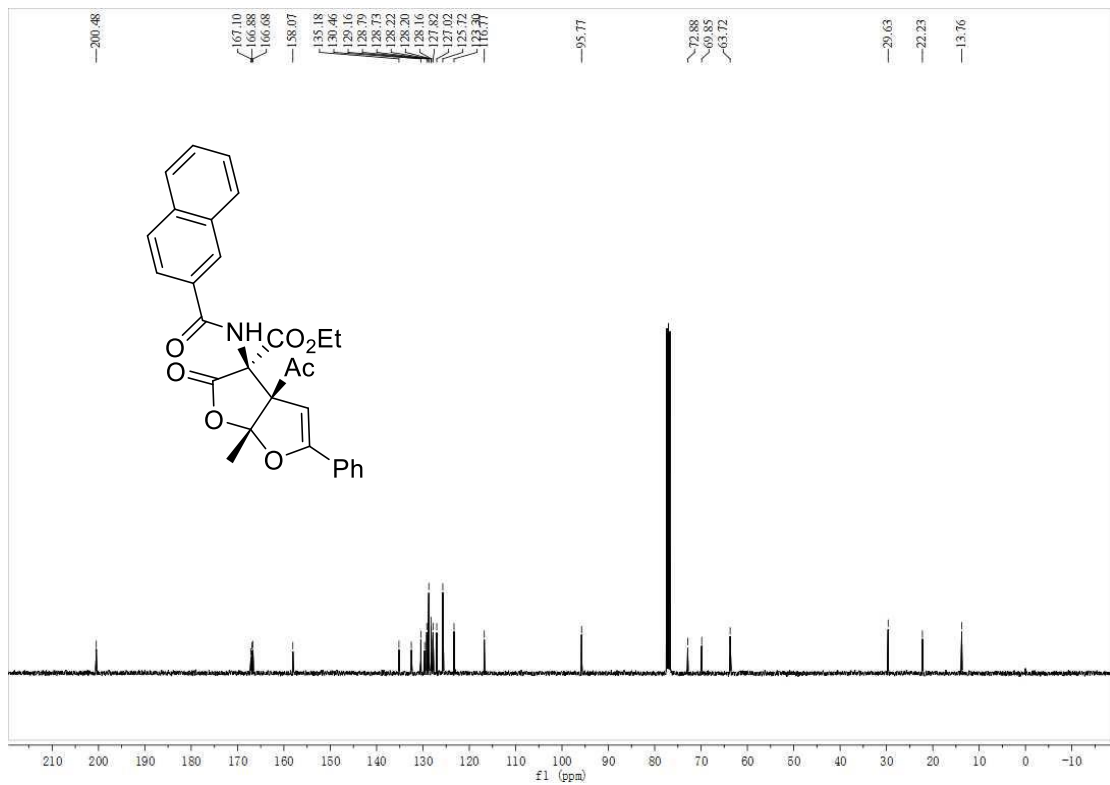

(±)-3q

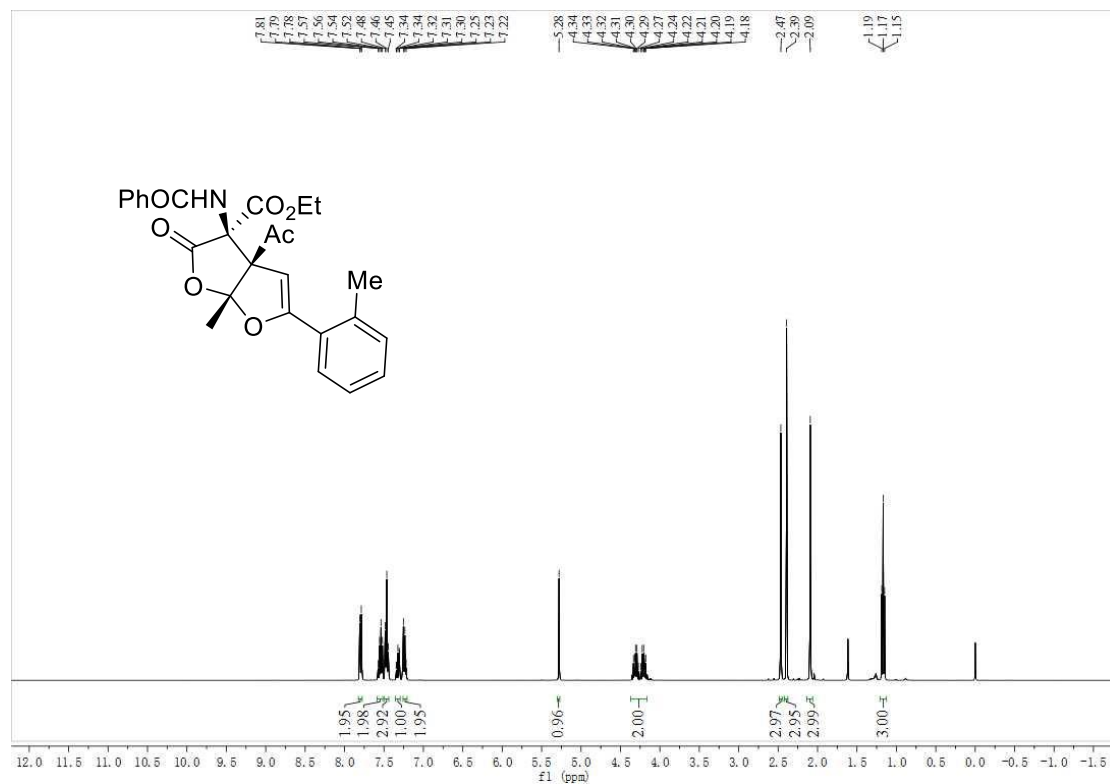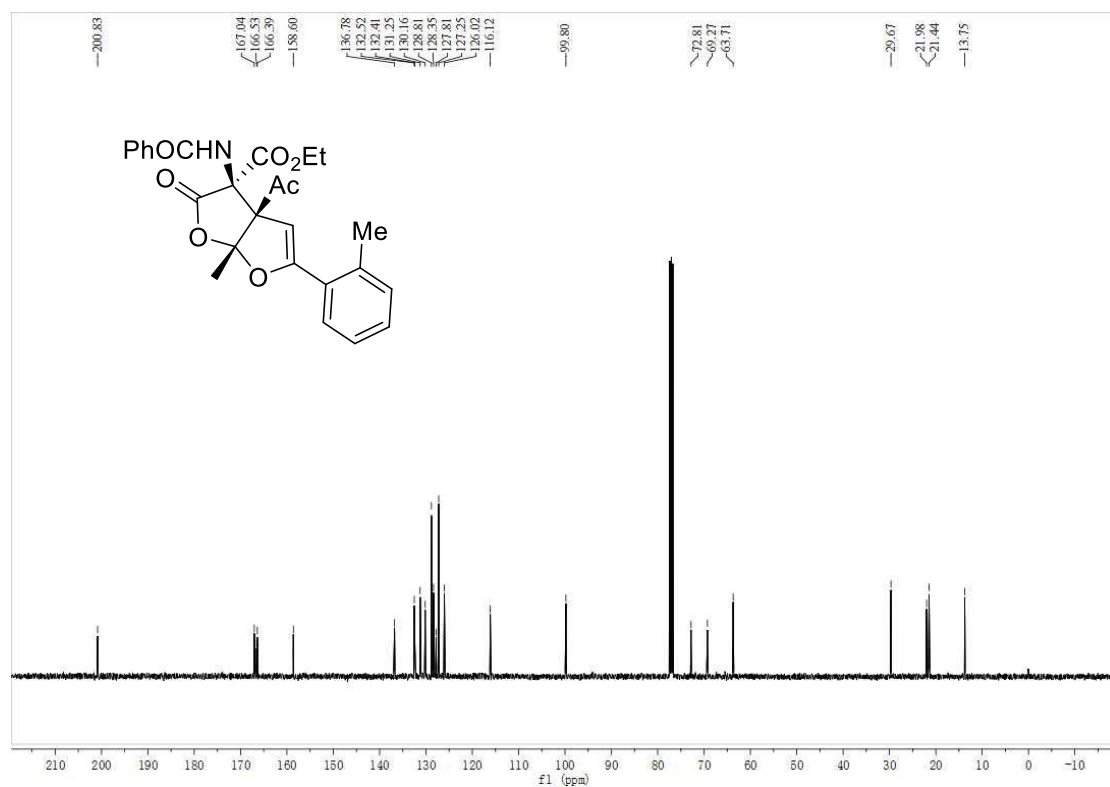

(±)-3r

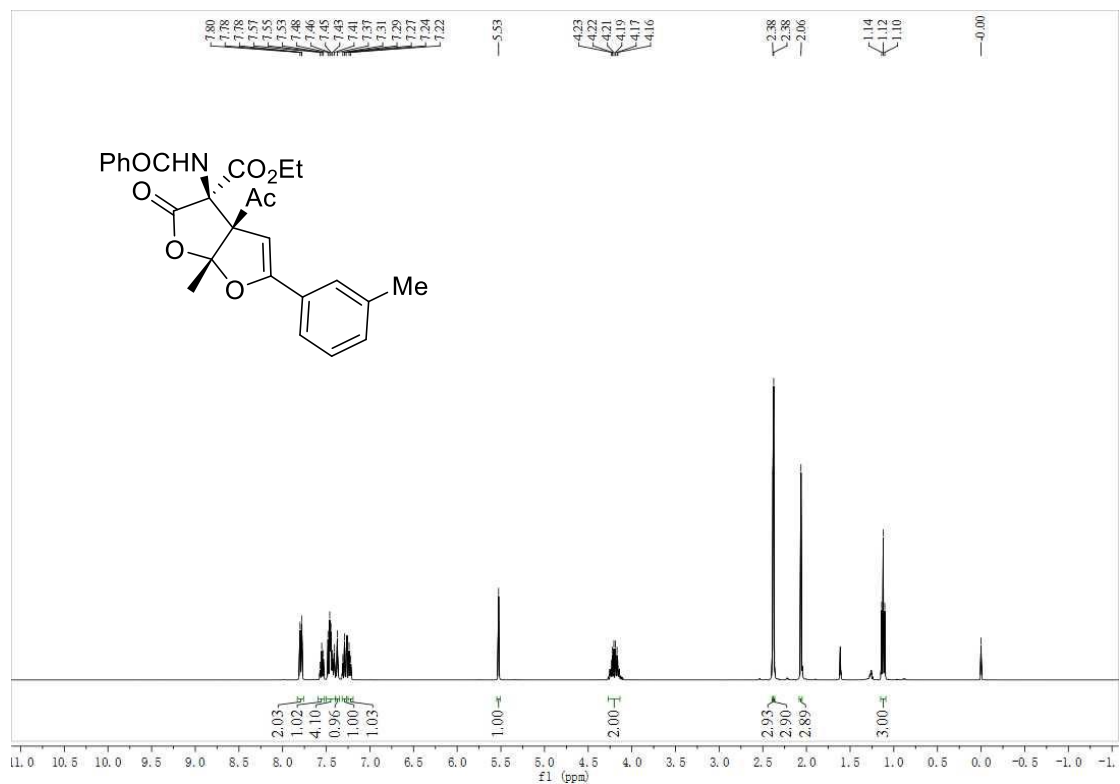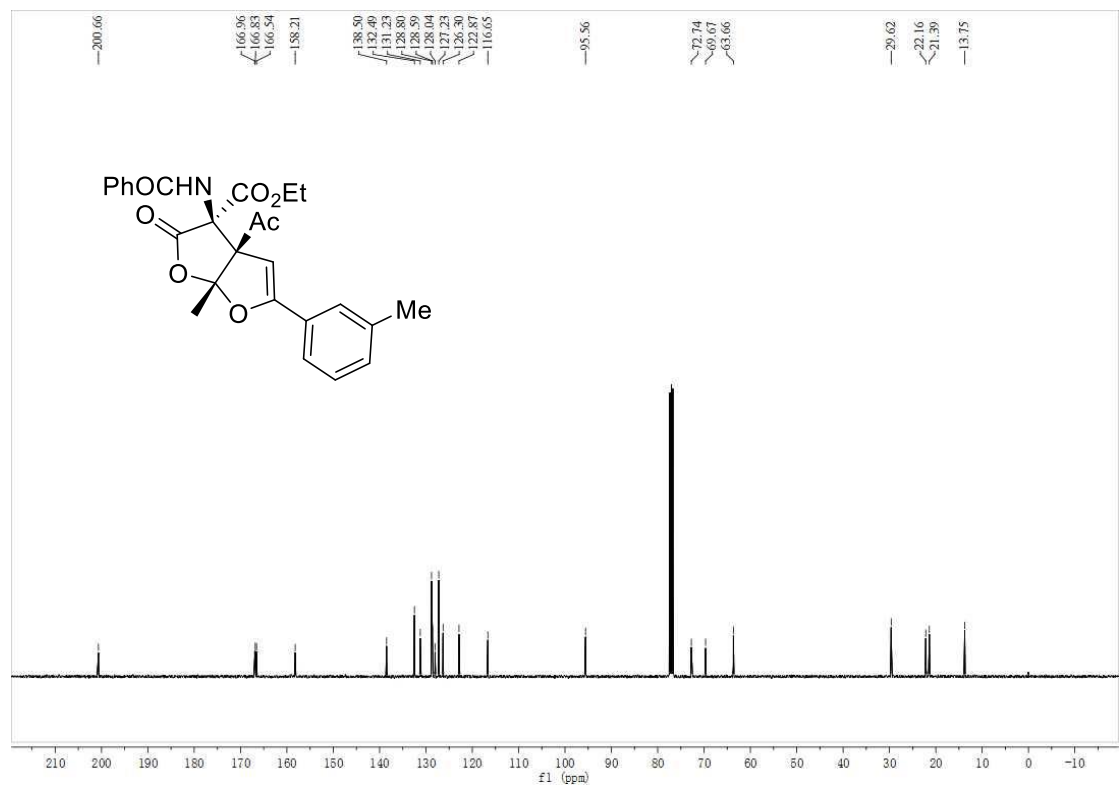

(±)-3s

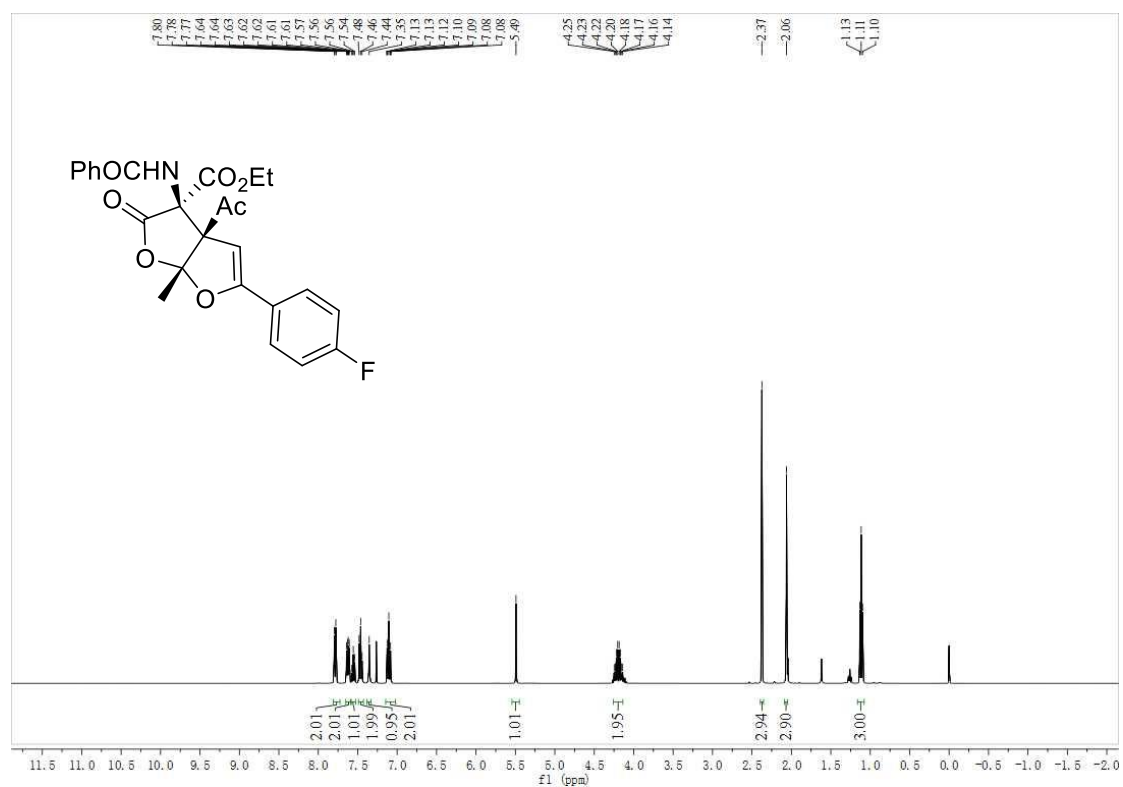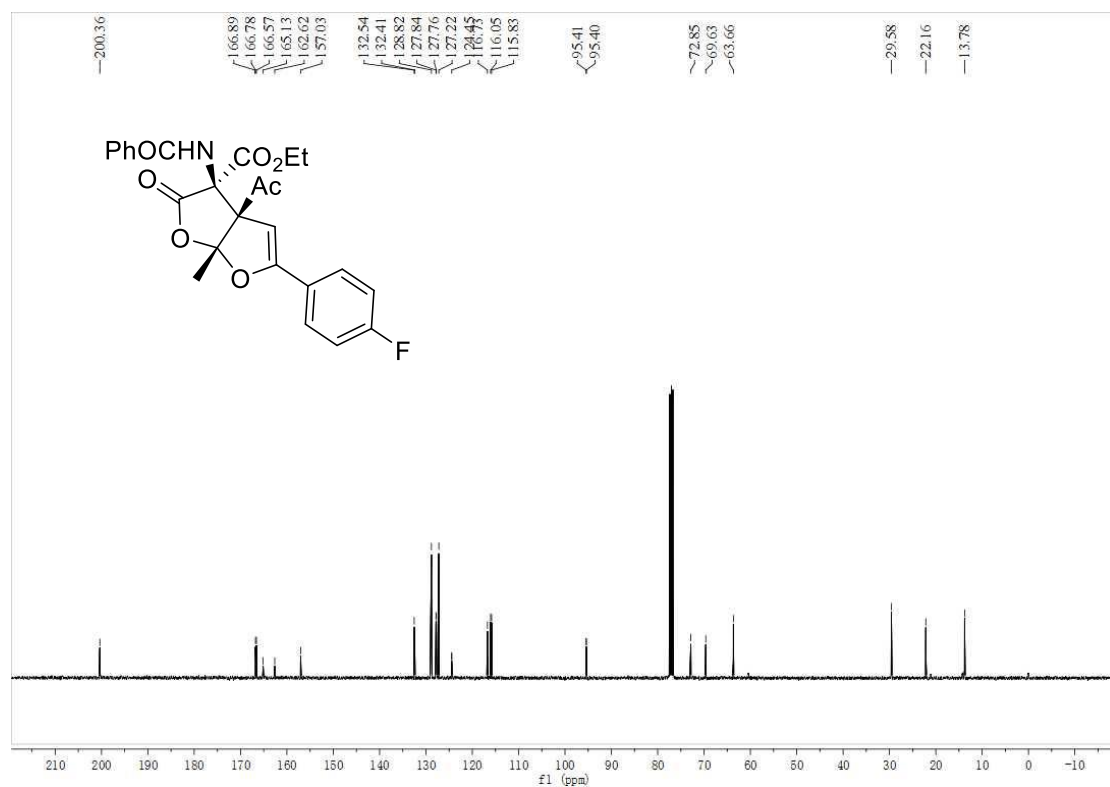

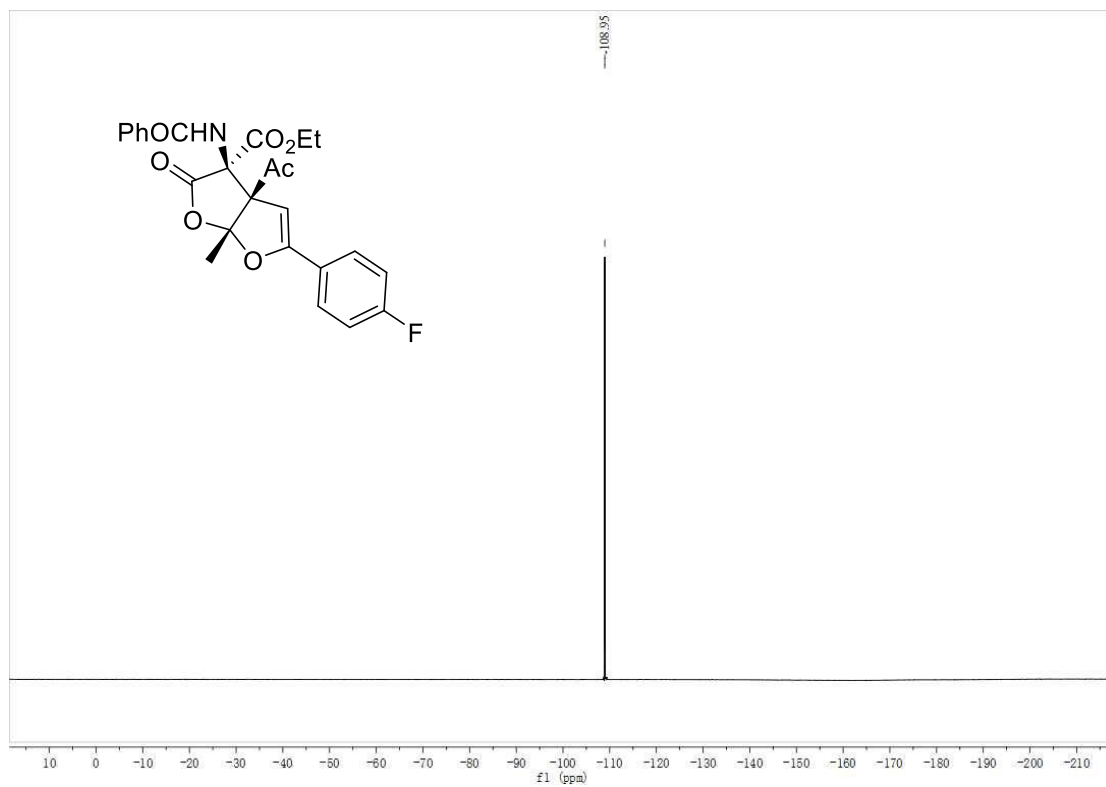

(±)-3t

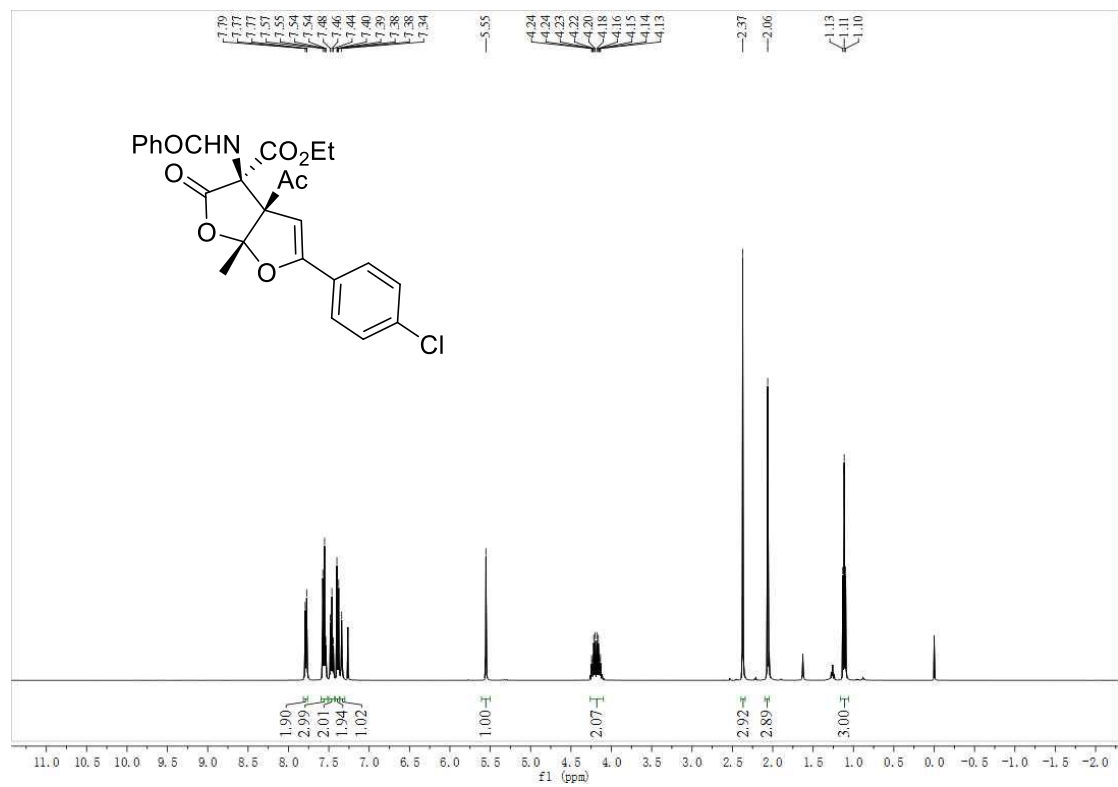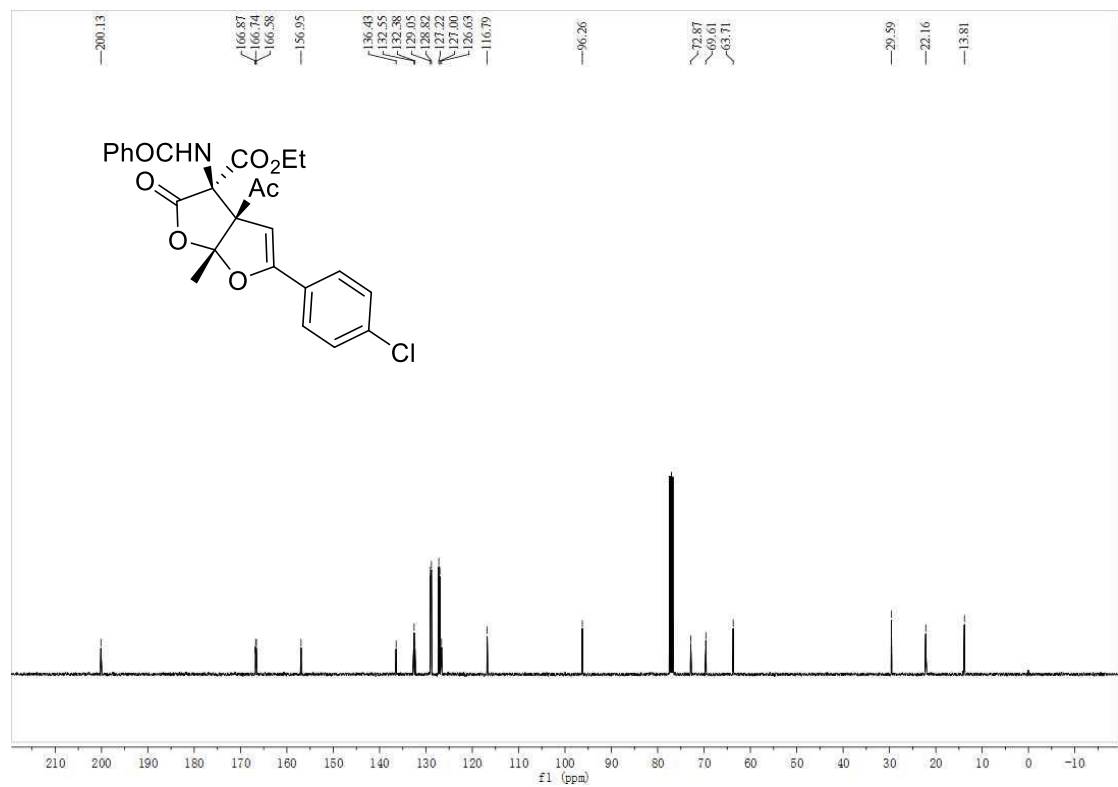



(±)-3u

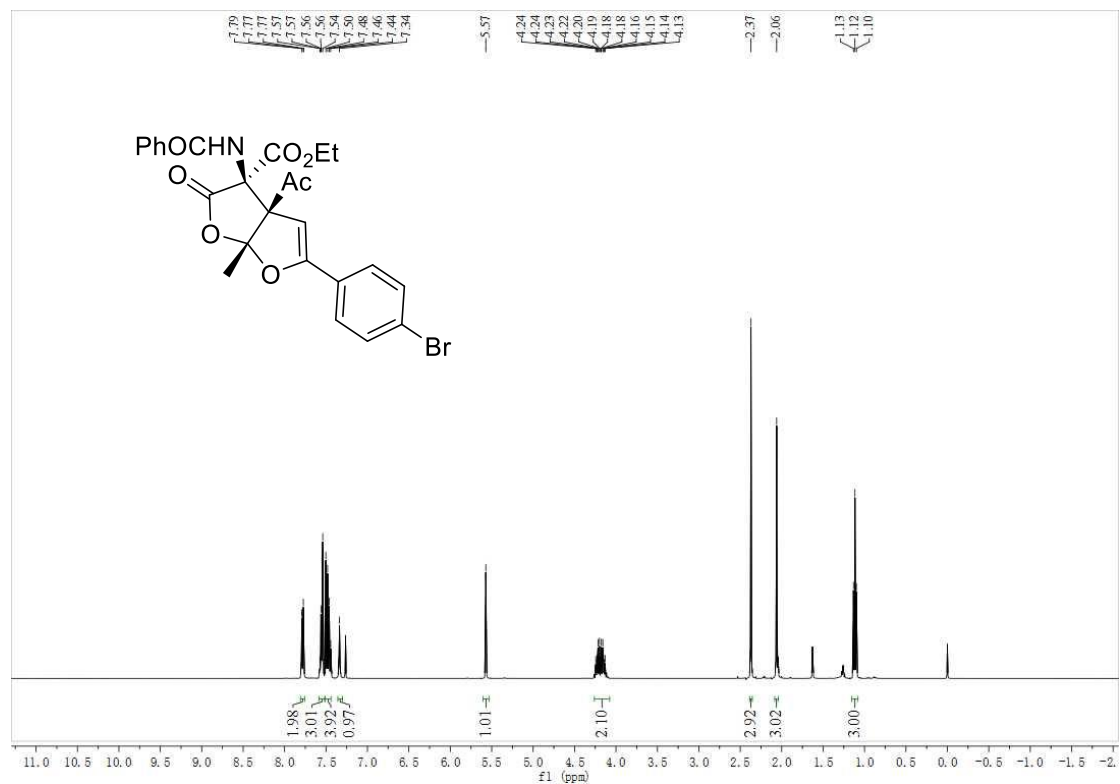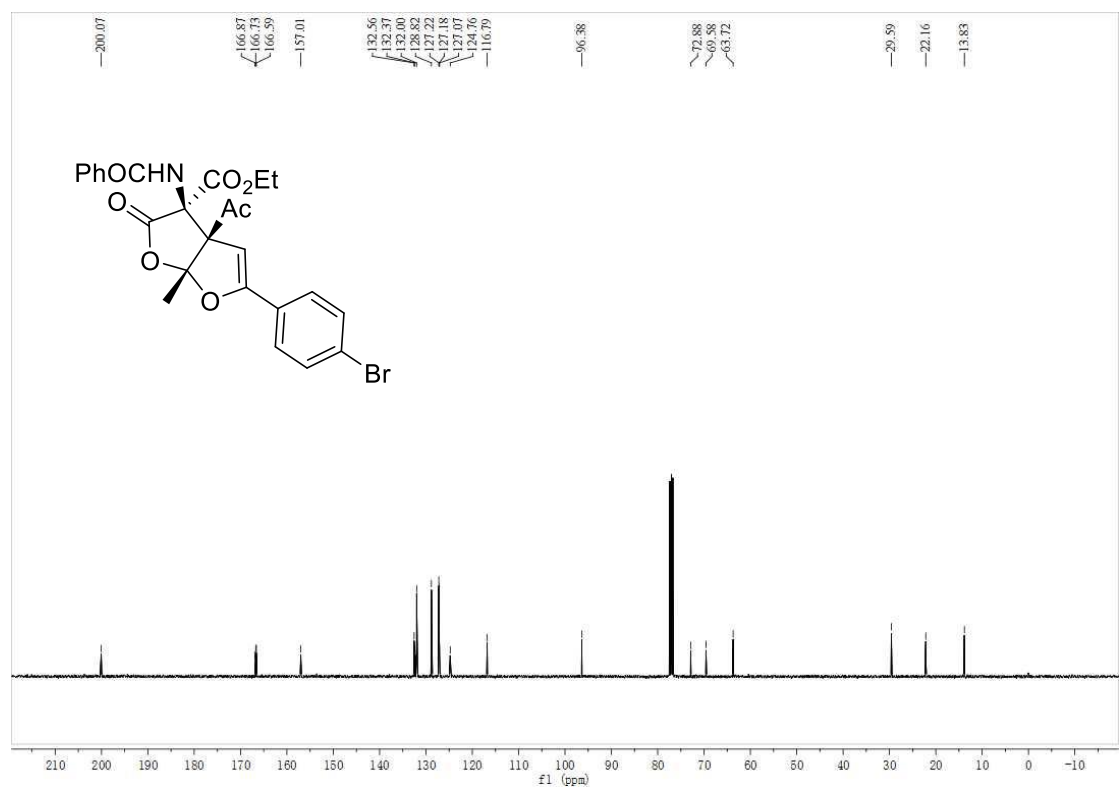

(±)-3v

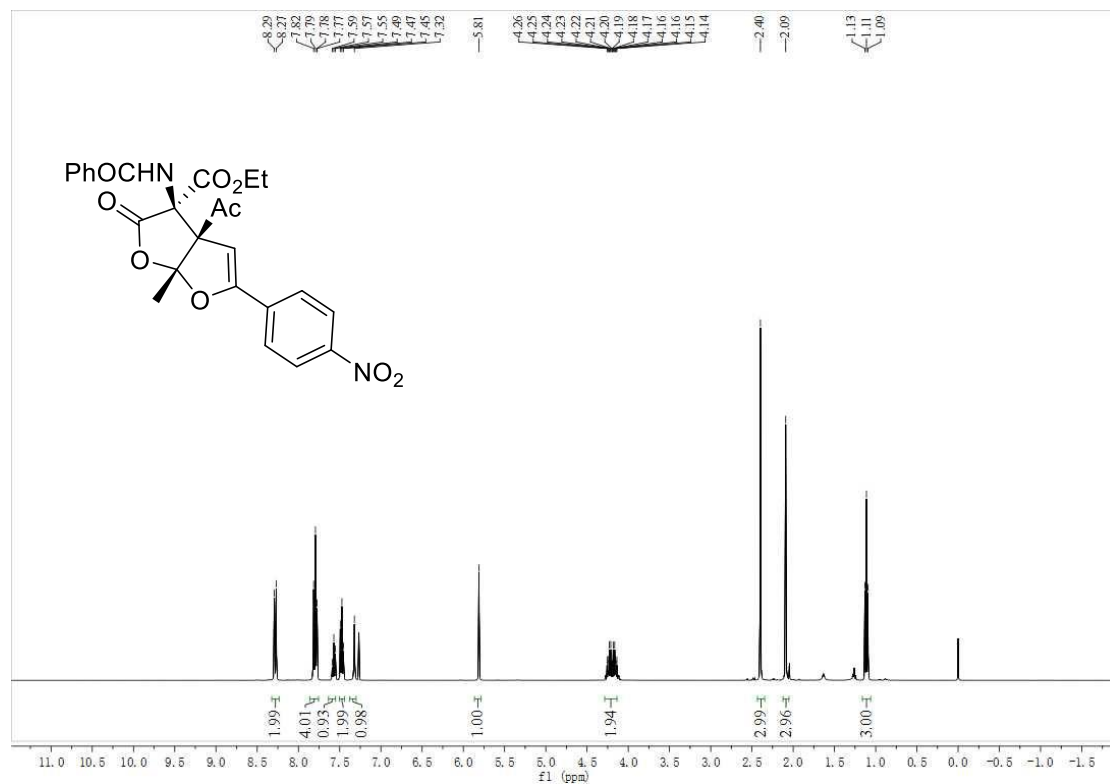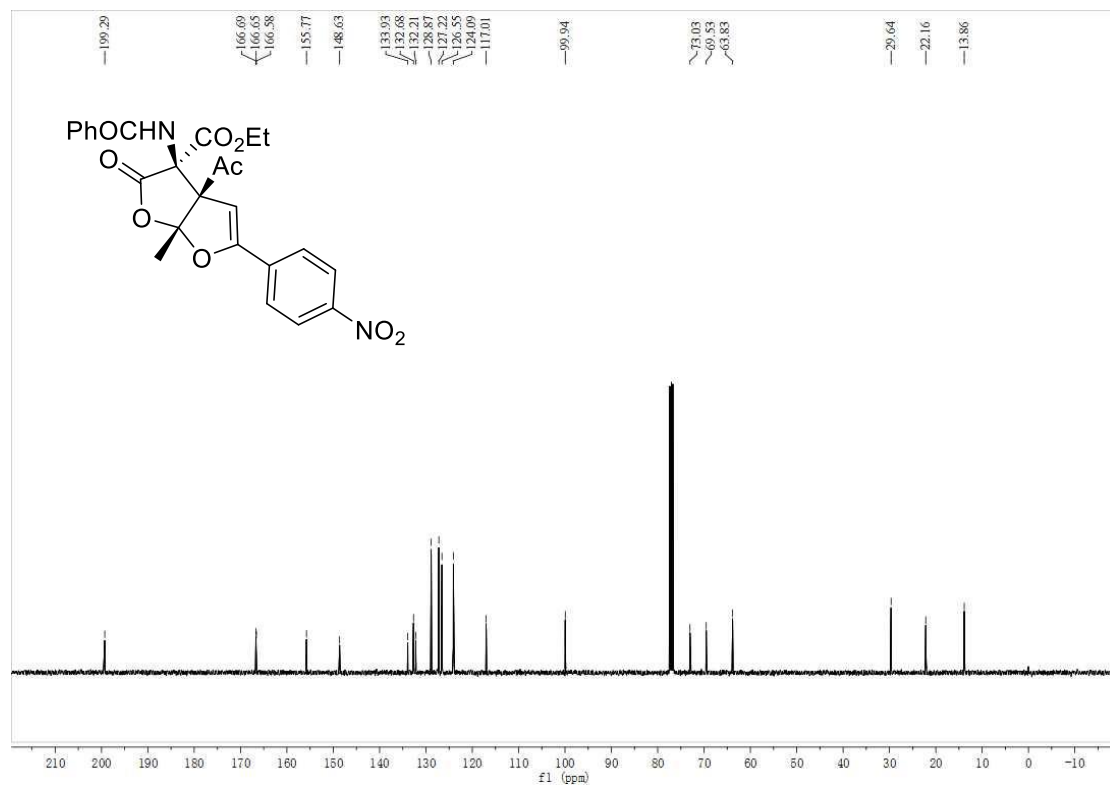

(±)-3w

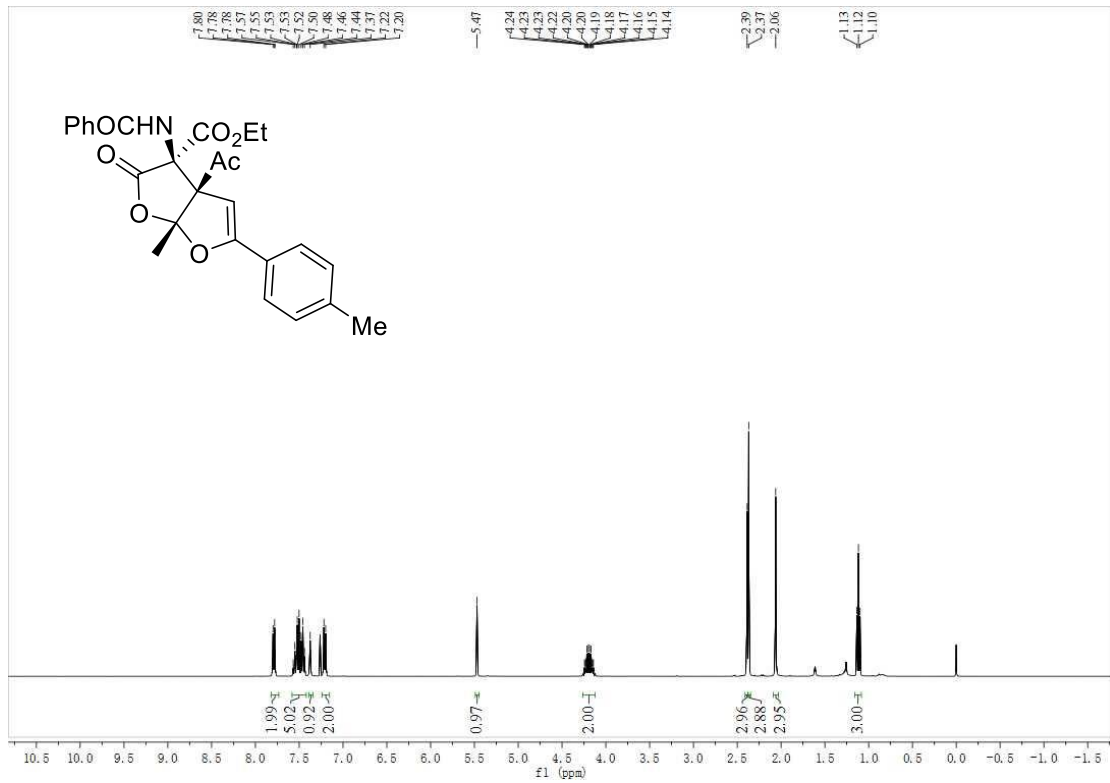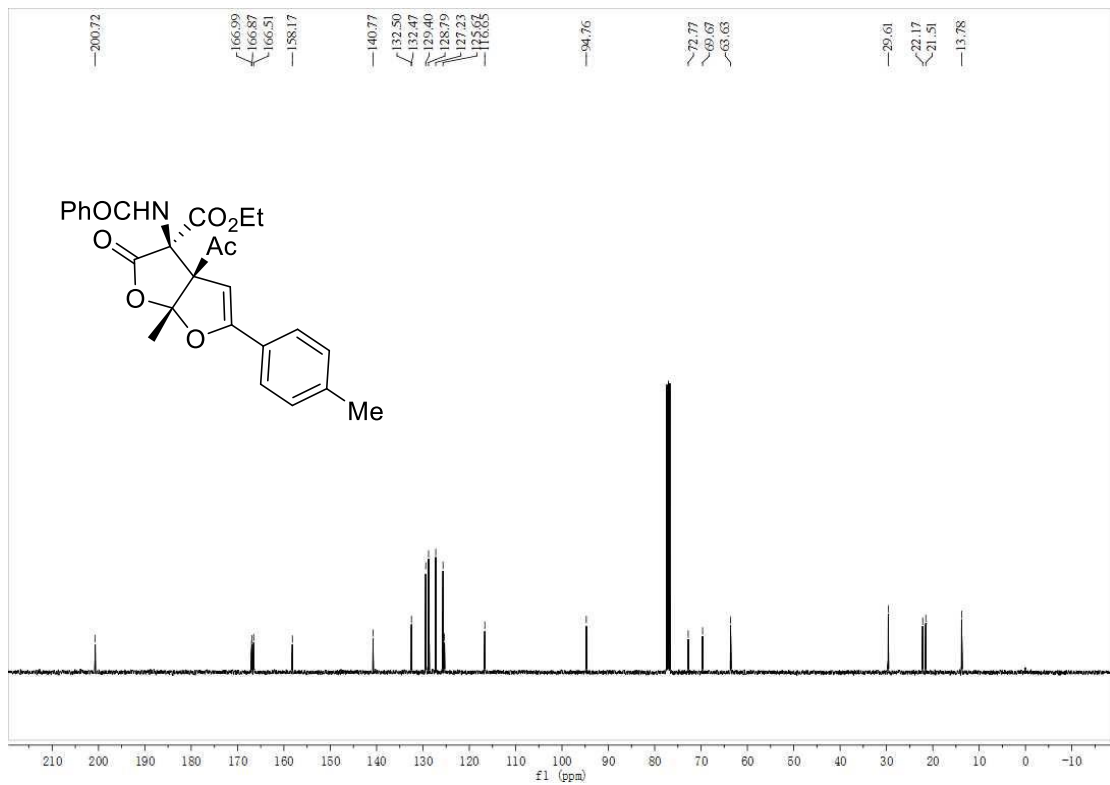

(±)-3x

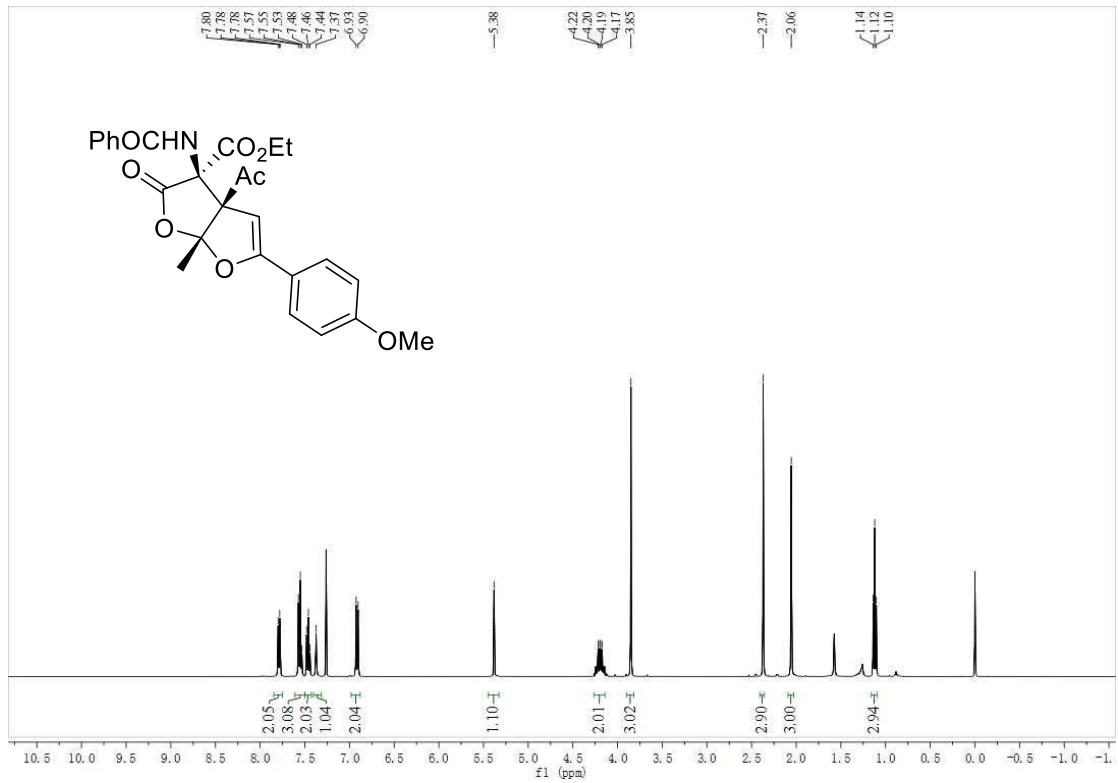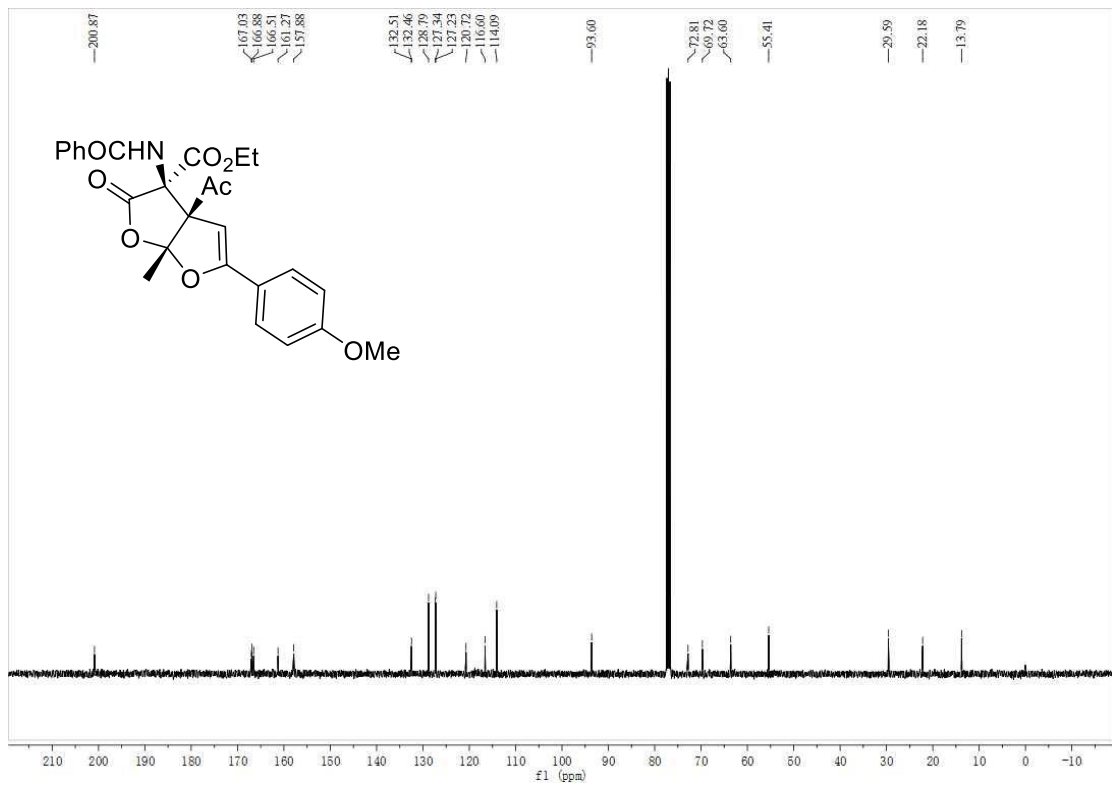

(±)-3y

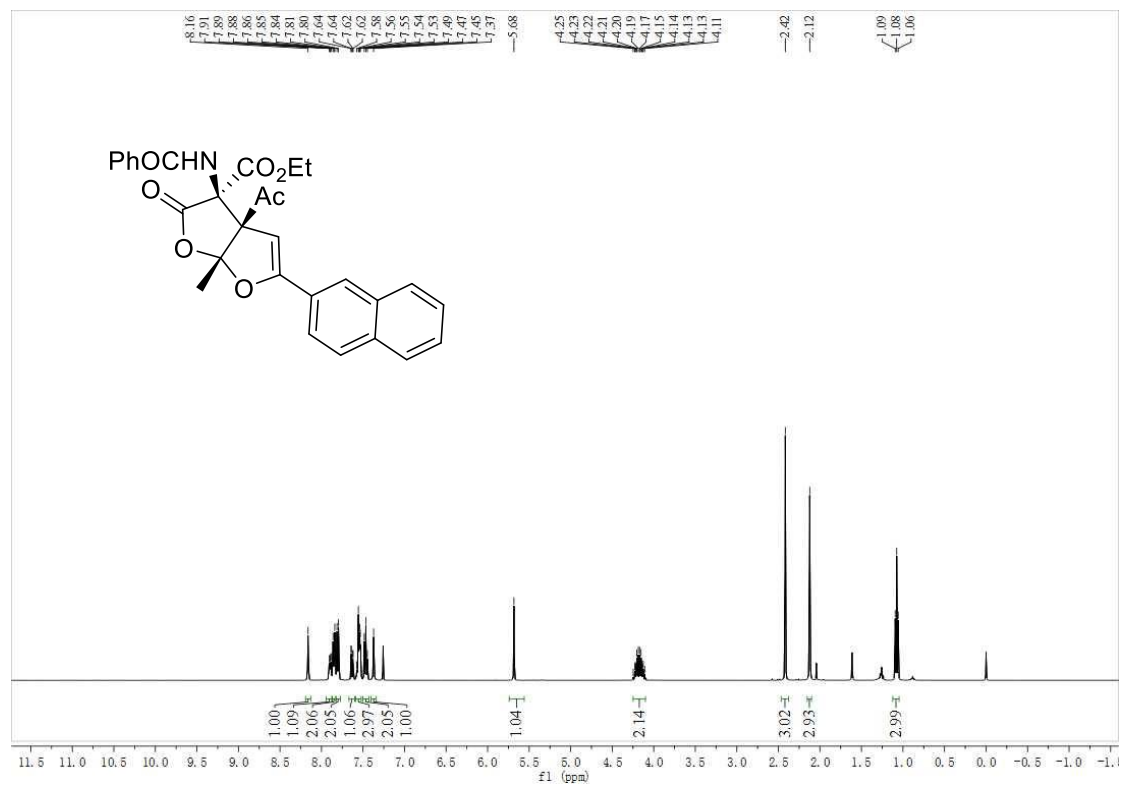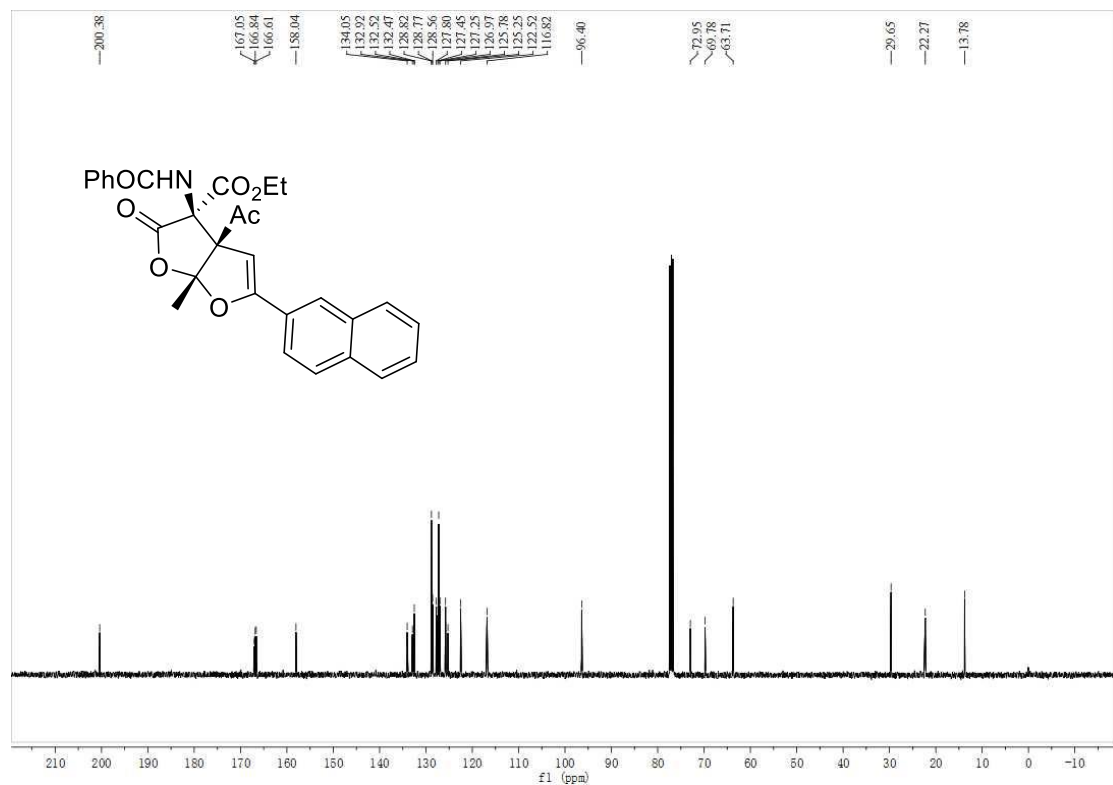

(±)-7:

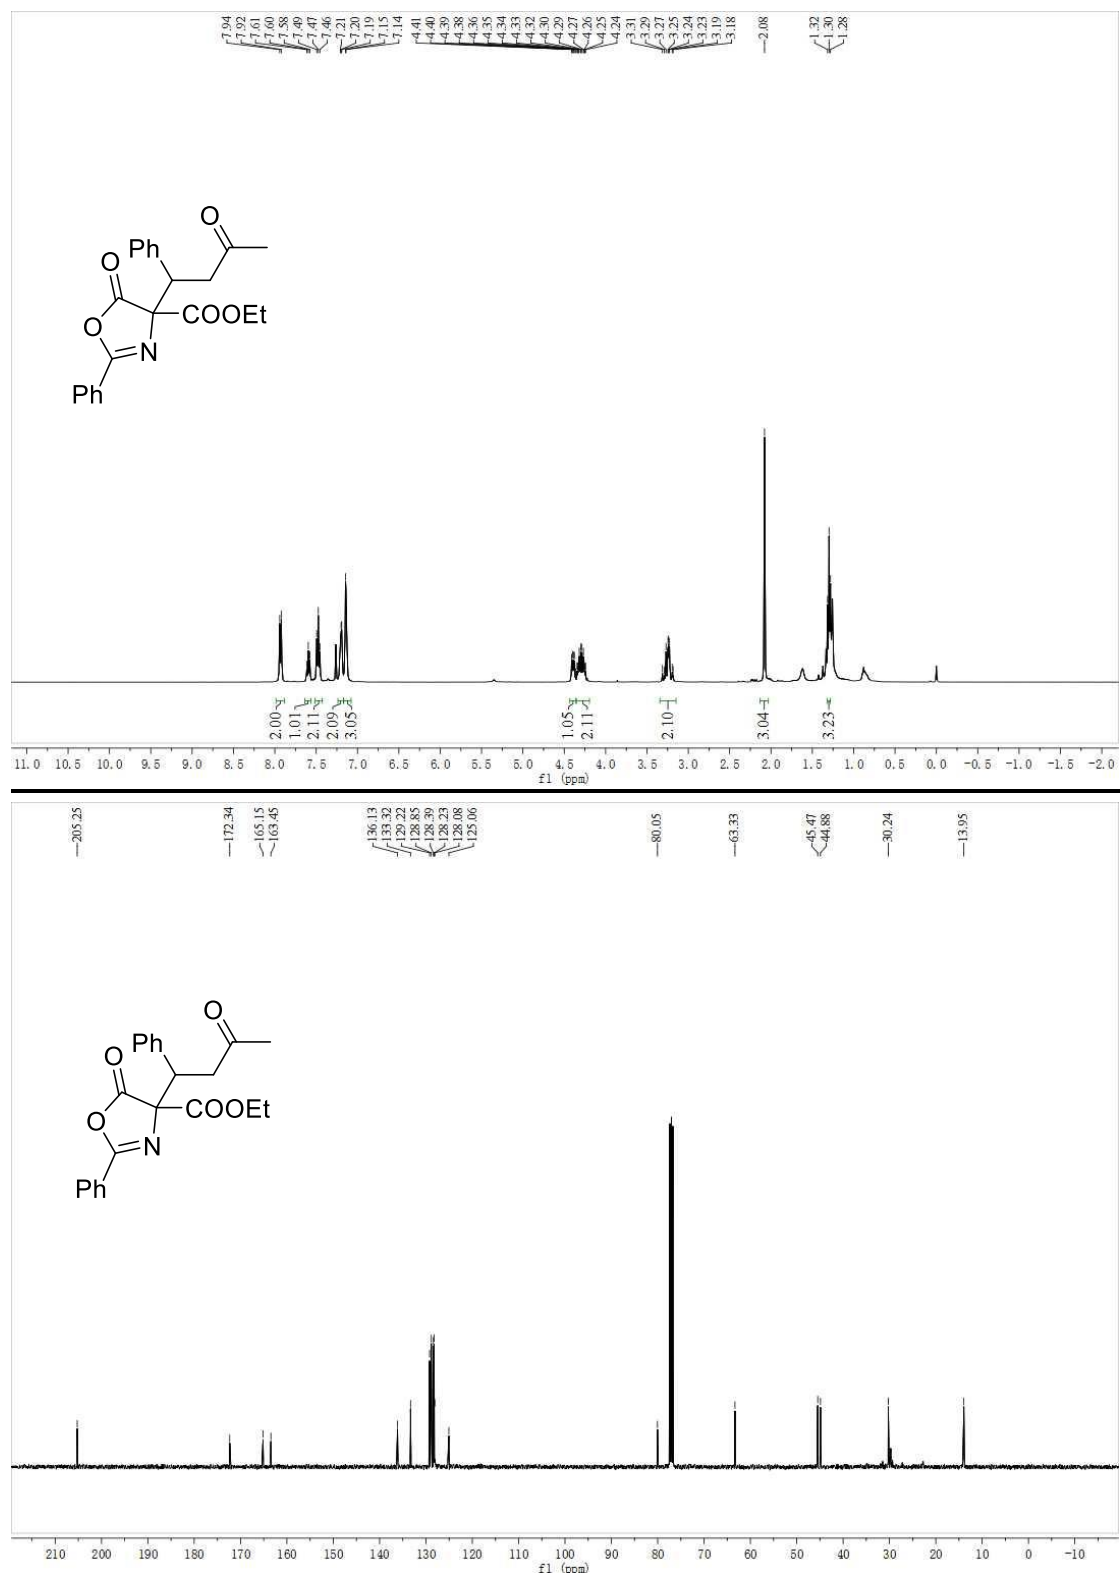

(±)-10:

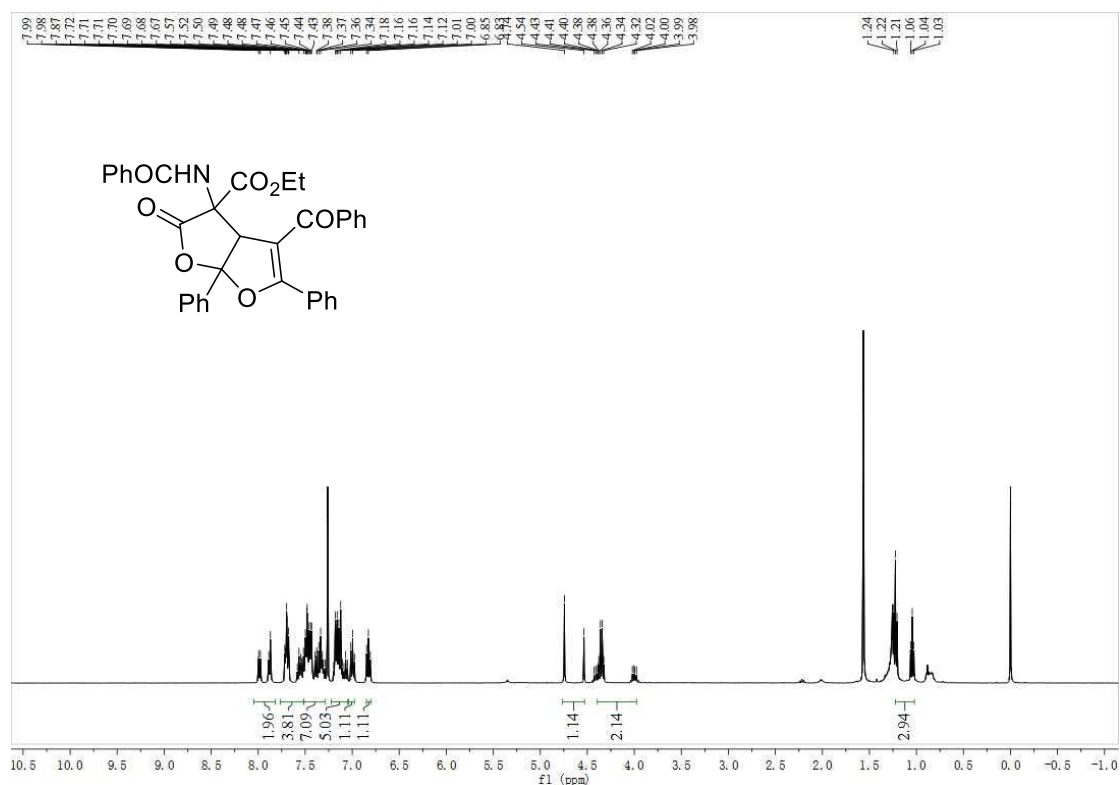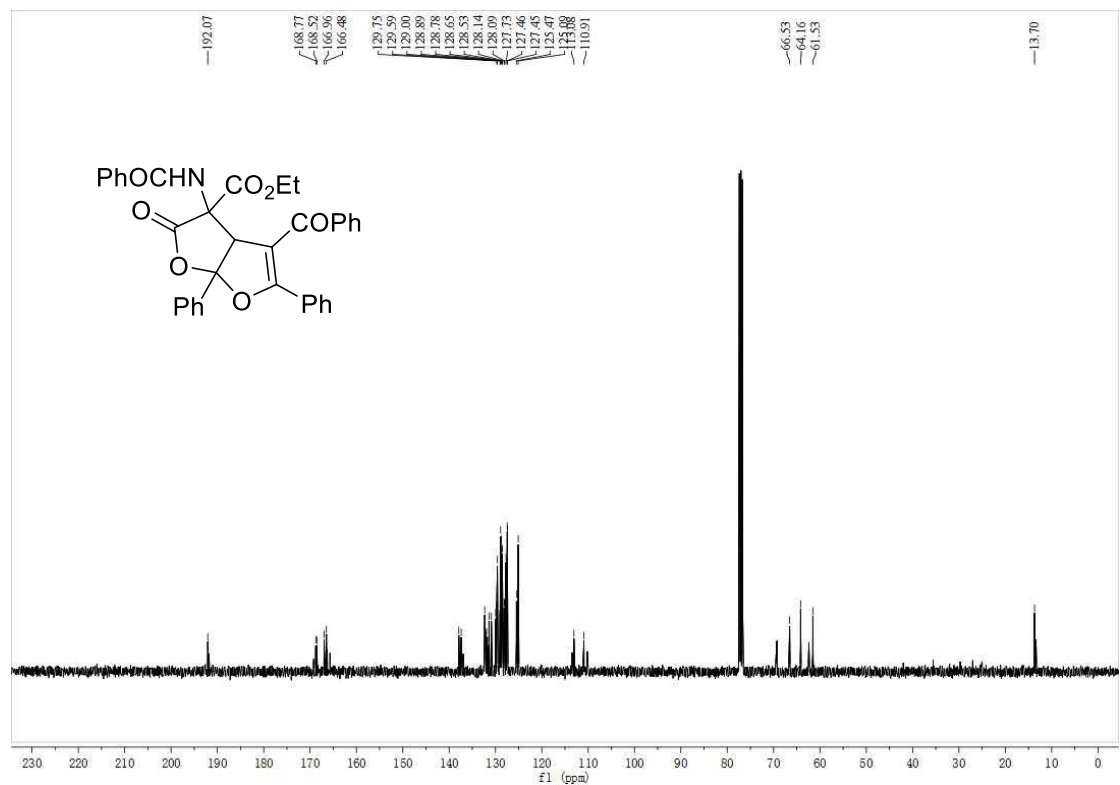

## 7. HPLC spectra

3a

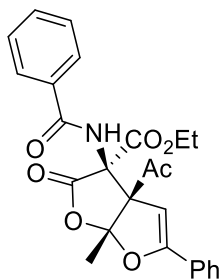

Before recrystallization:

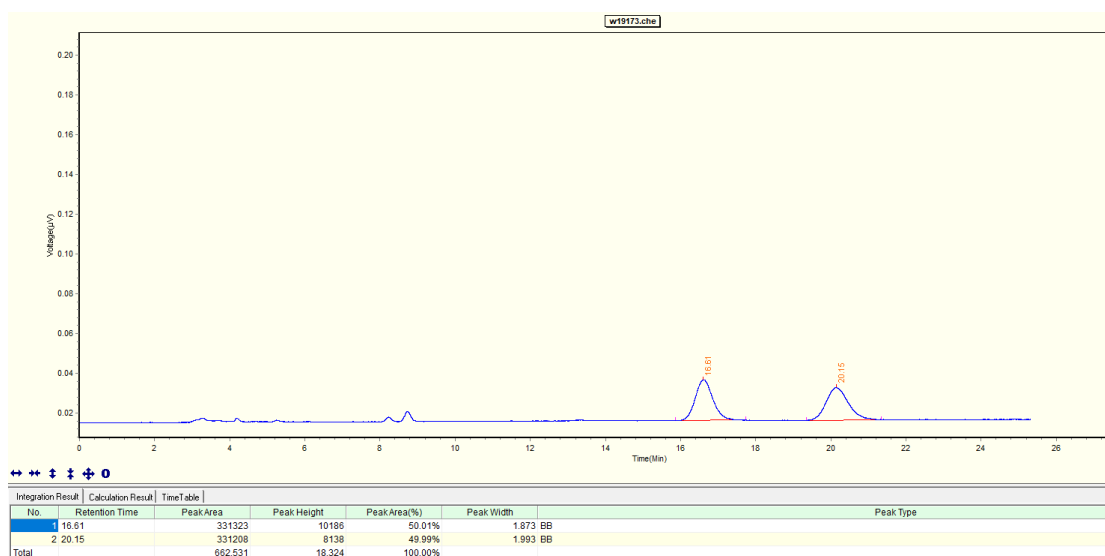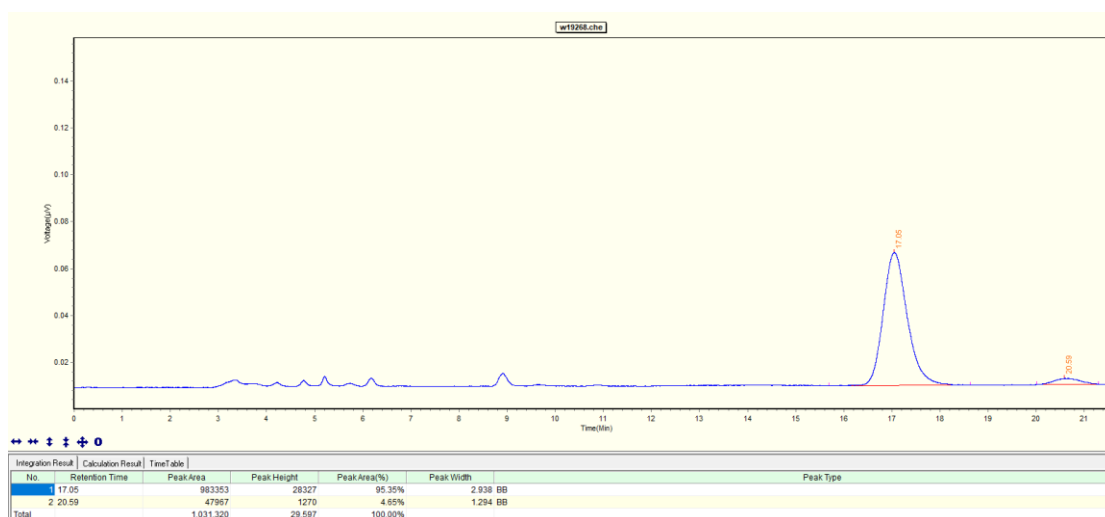



After recrystallization.

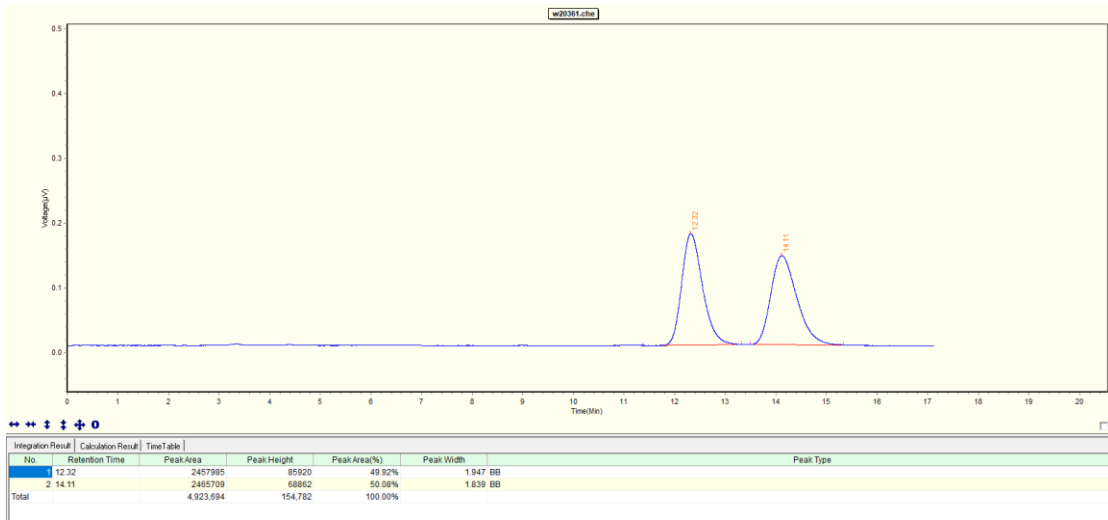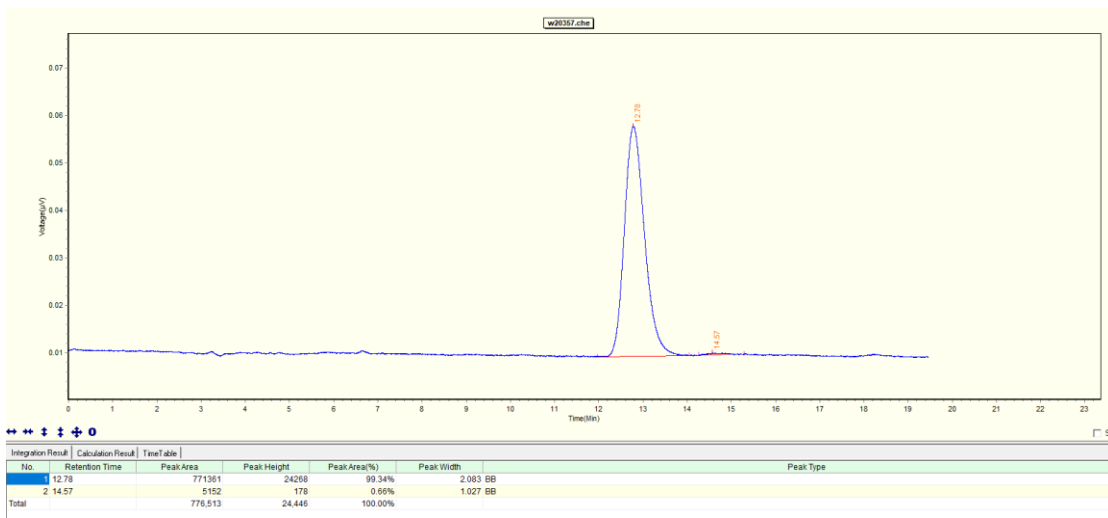

3b

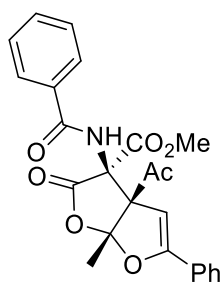

Before recrystallization

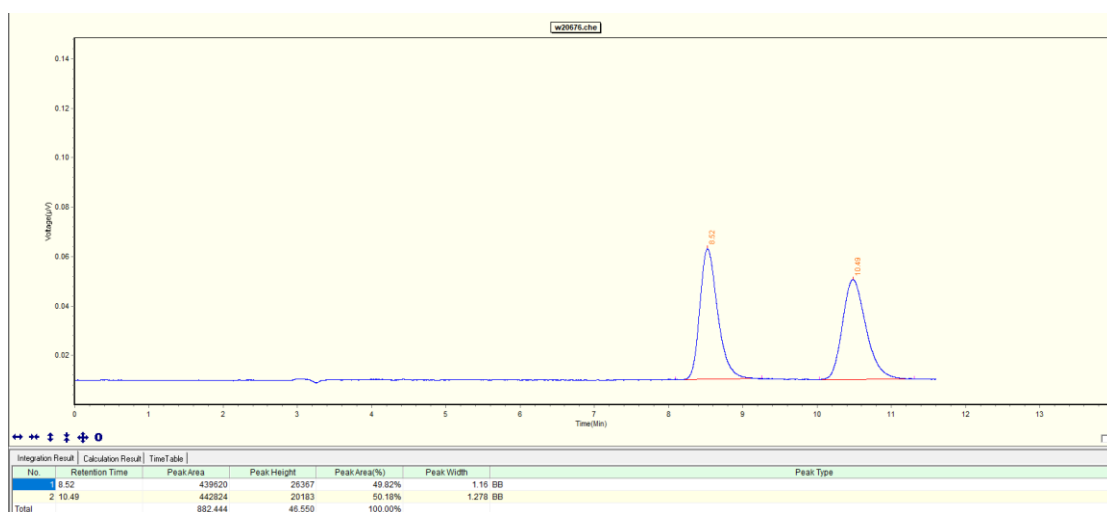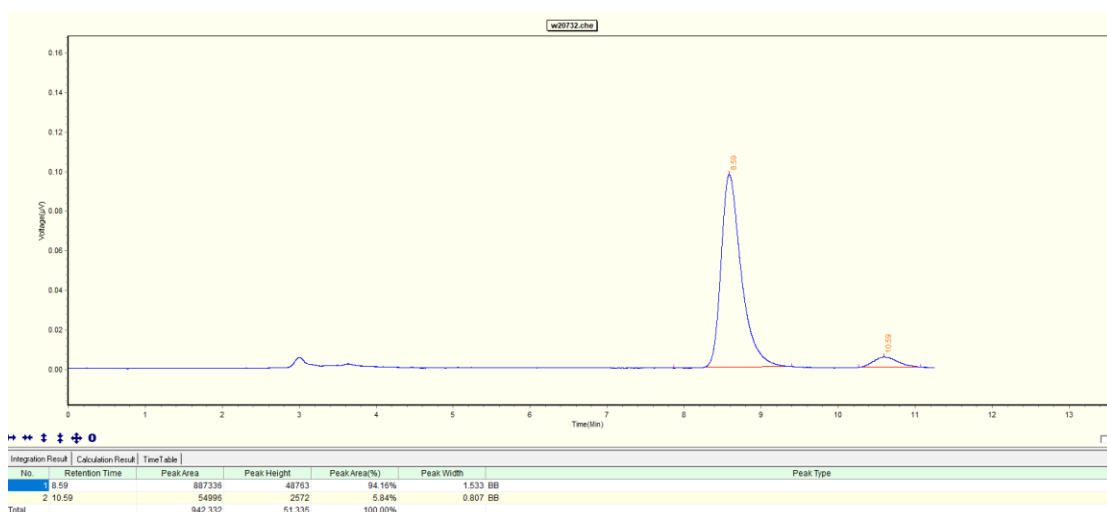

After recrystallization.

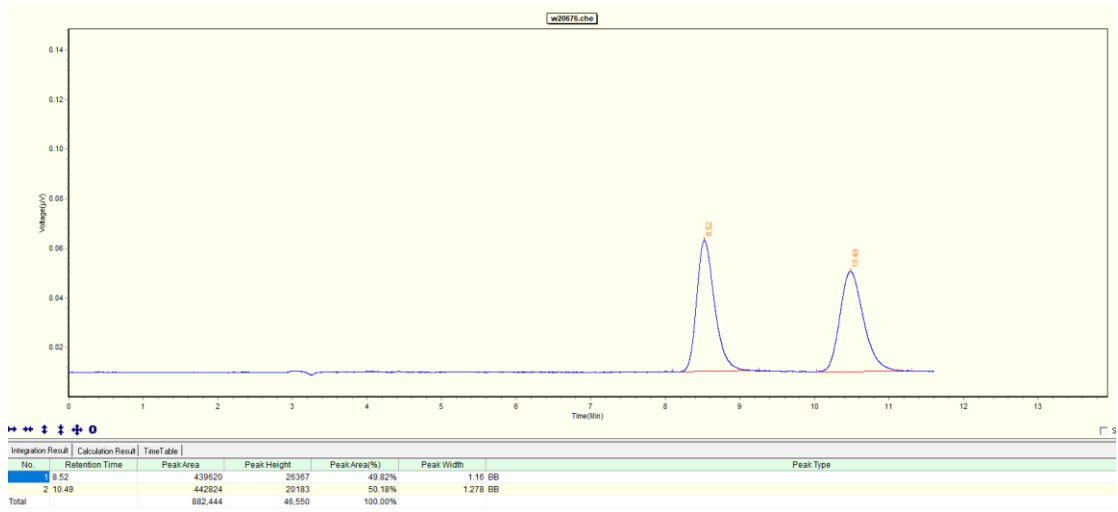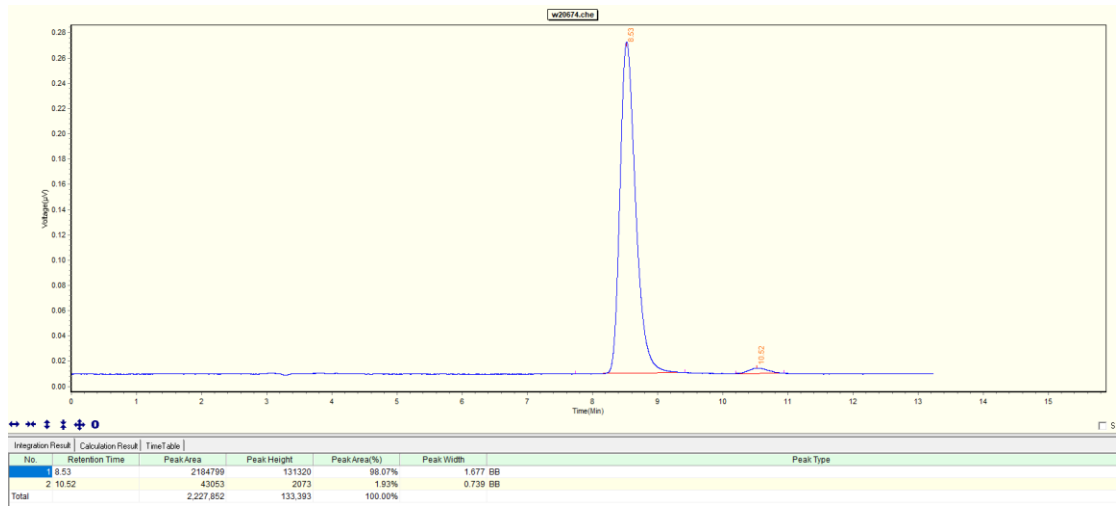

3e

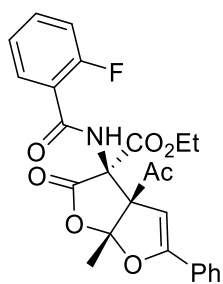

Before recrystallization

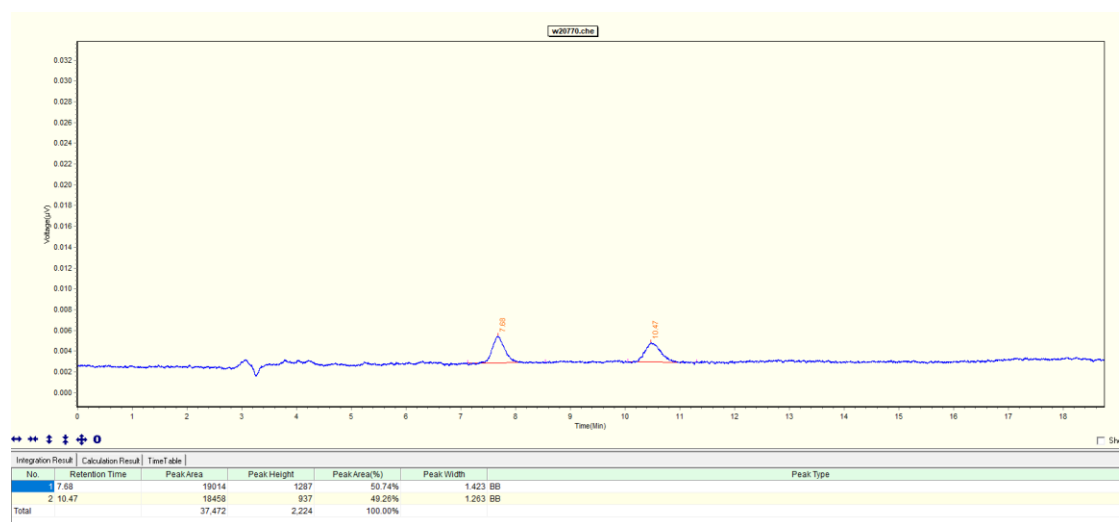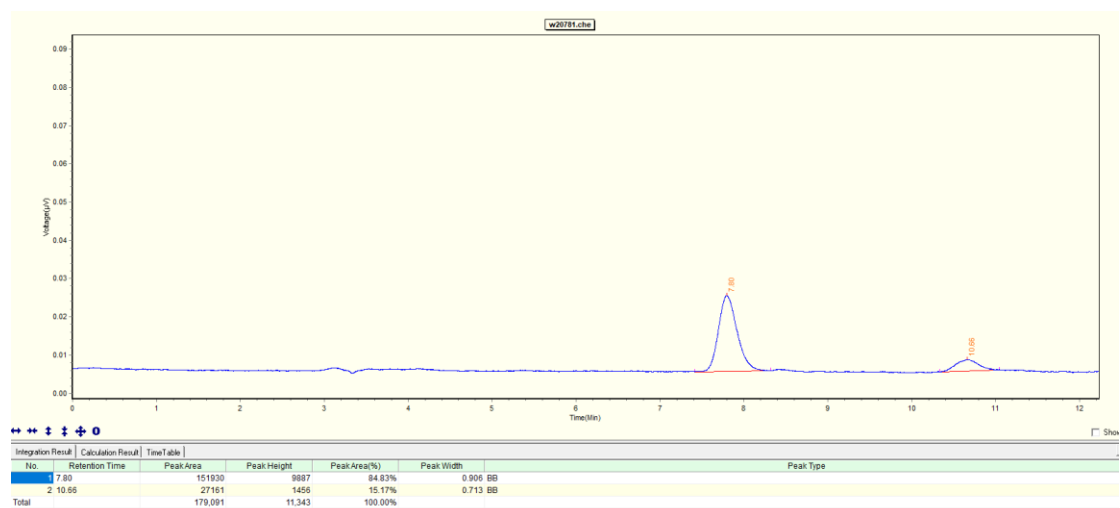

After recrystallization.

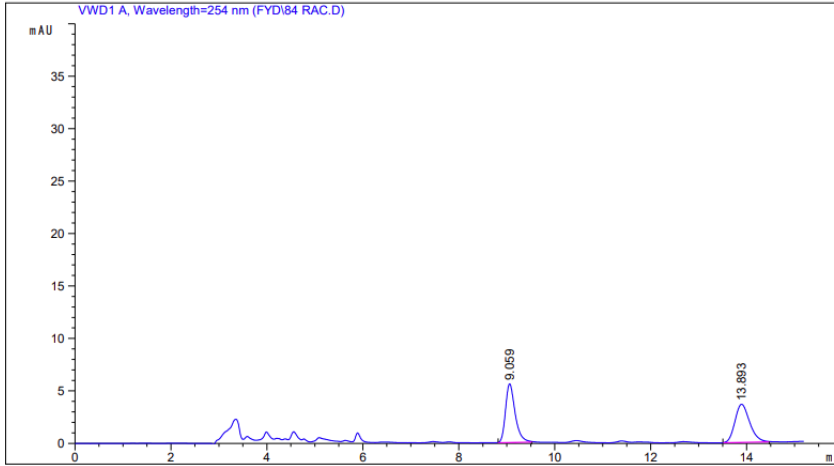

=====  
 Area Percent Report  
 =====

Sorted By : Signal  
 Multiplier : 1.0000  
 Dilution : 1.0000  
 Use Multiplier & Dilution Factor with ISTDs

Signal 1: VWD1 A, Wavelength=254 nm

| Peak # | RetTime [min] | Type | Width [min] | Area mAU *s | Height [mAU] | Area %  |
|--------|---------------|------|-------------|-------------|--------------|---------|
| 1      | 9.059         | BB   | 0.2118      | 77.86799    | 5.59749      | 50.2228 |
| 2      | 13.893        | BB   | 0.3249      | 77.17713    | 3.63493      | 49.7772 |

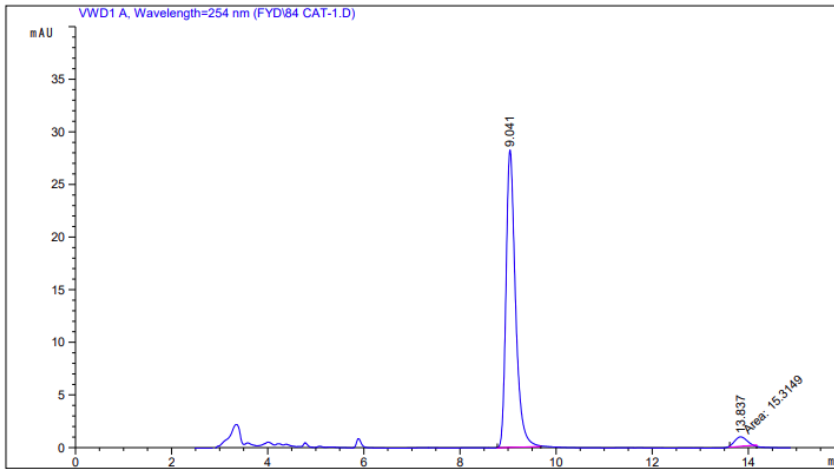

=====  
 Area Percent Report  
 =====

Sorted By : Signal  
 Multiplier : 1.0000  
 Dilution : 1.0000  
 Use Multiplier & Dilution Factor with ISTDs

Signal 1: VWD1 A, Wavelength=254 nm

| Peak # | RetTime [min] | Type | Width [min] | Area mAU *s | Height [mAU] | Area %  |
|--------|---------------|------|-------------|-------------|--------------|---------|
| 1      | 9.041         | BB   | 0.2060      | 385.81775   | 28.24062     | 96.1821 |
| 2      | 13.837        | MM   | 0.2837      | 15.31486    | 8.99570e-1   | 3.8179  |

3f

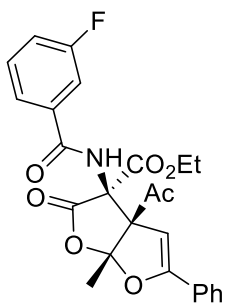

Before recrystallization

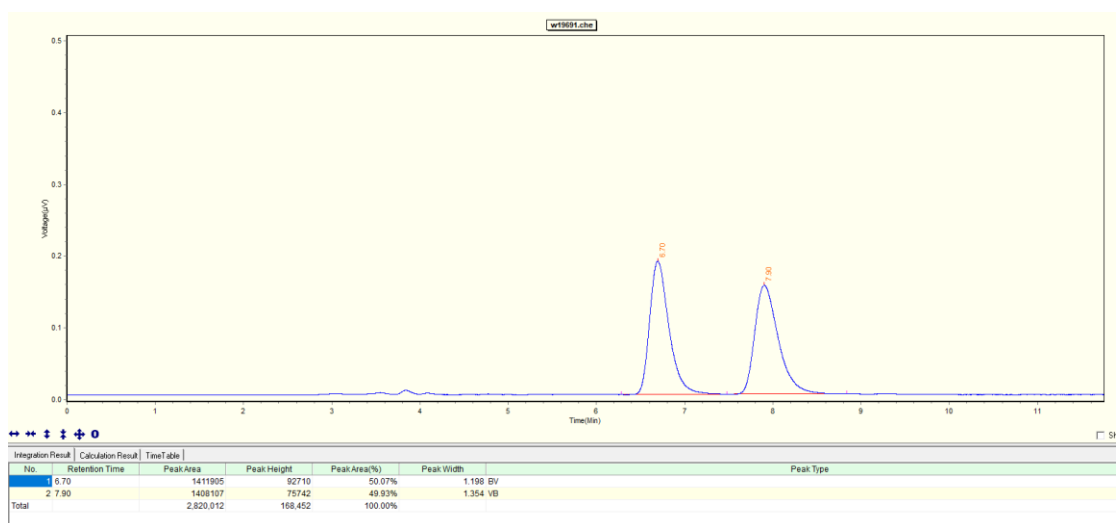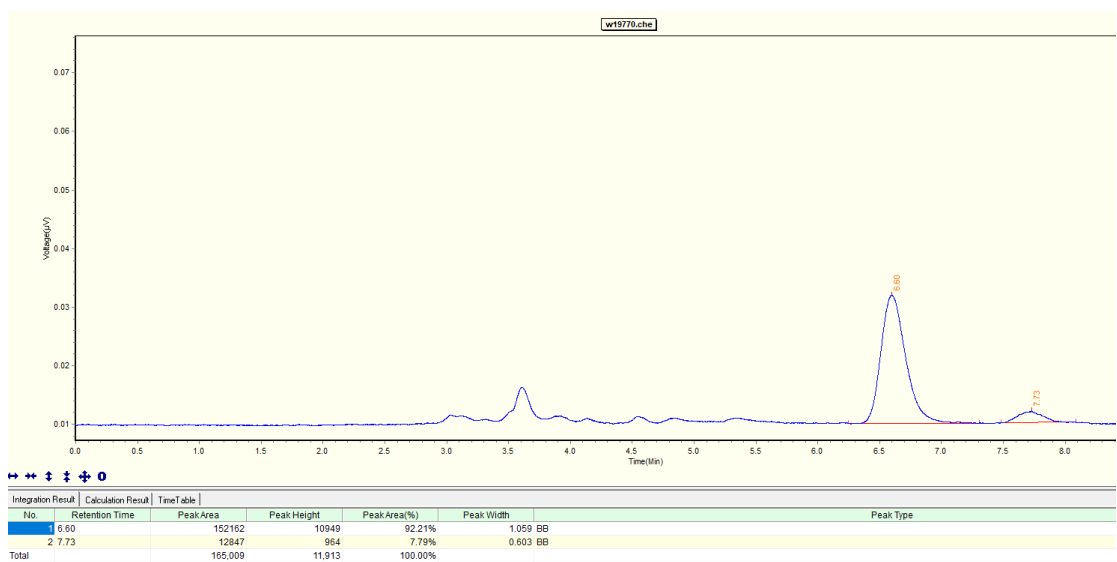

After recrystallization.

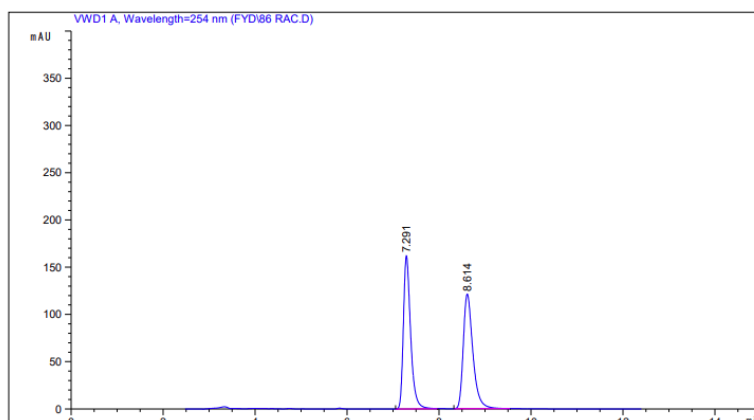

=====  
Area Percent Report  
=====

Sorted By : Signal  
Multiplier : 1.0000  
Dilution : 1.0000  
Use Multiplier & Dilution Factor with ISTDs

Signal 1: VWD1 A, Wavelength=254 nm

| Peak # | RetTime [min] | Type | Width [min] | Area mAU*s | Height [mAU] | Area %  |
|--------|---------------|------|-------------|------------|--------------|---------|
| 1      | 7.291         | BB   | 0.1654      | 1770.99622 | 162.01620    | 50.0874 |
| 2      | 8.614         | BB   | 0.2206      | 1764.81274 | 121.40273    | 49.9126 |

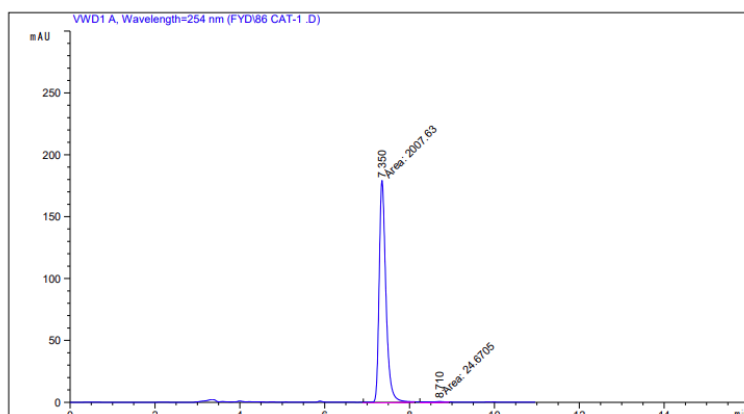

=====  
Area Percent Report  
=====

Sorted By : Signal  
Multiplier : 1.0000  
Dilution : 1.0000  
Use Multiplier & Dilution Factor with ISTDs

Signal 1: VWD1 A, Wavelength=254 nm

| Peak # | RetTime [min] | Type | Width [min] | Area mAU*s | Height [mAU] | Area %  |
|--------|---------------|------|-------------|------------|--------------|---------|
| 1      | 7.350         | MM   | 0.1861      | 2007.62585 | 179.82129    | 98.7861 |
| 2      | 8.710         | MM   | 0.3706      | 24.67053   | 7.79884e-1   | 1.2139  |

3h

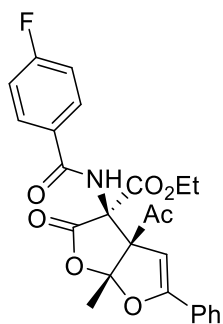

Before recrystallization

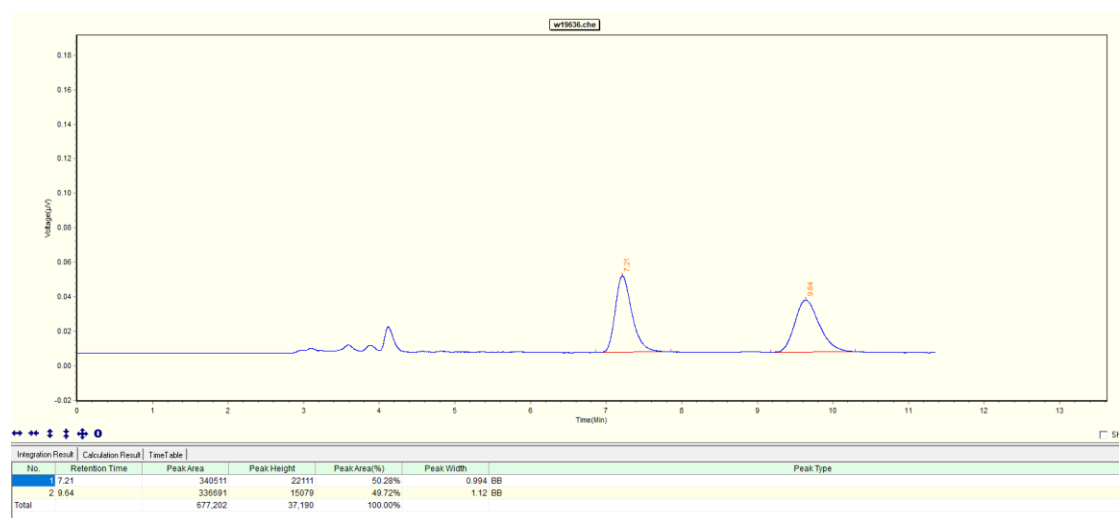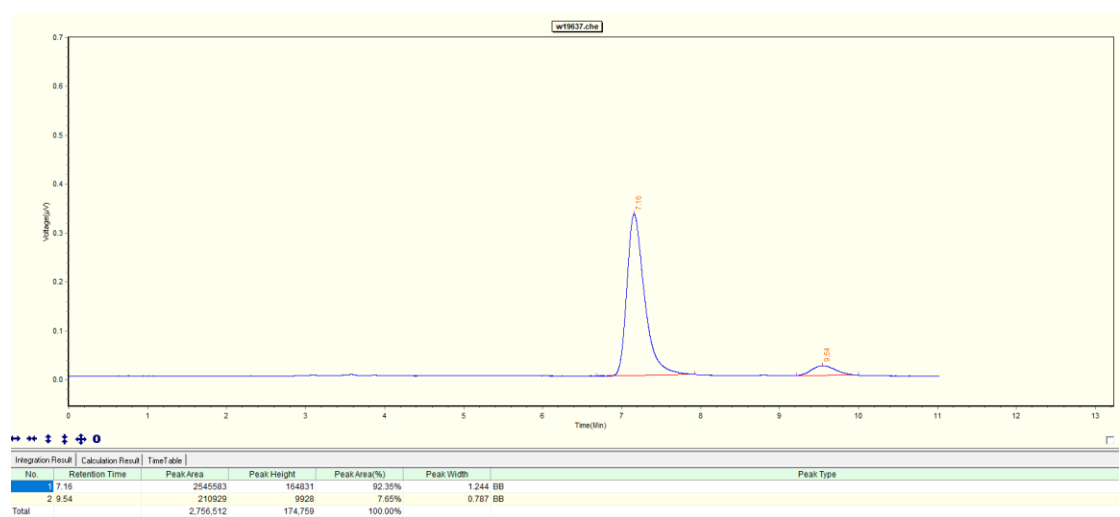

After recrystallization.



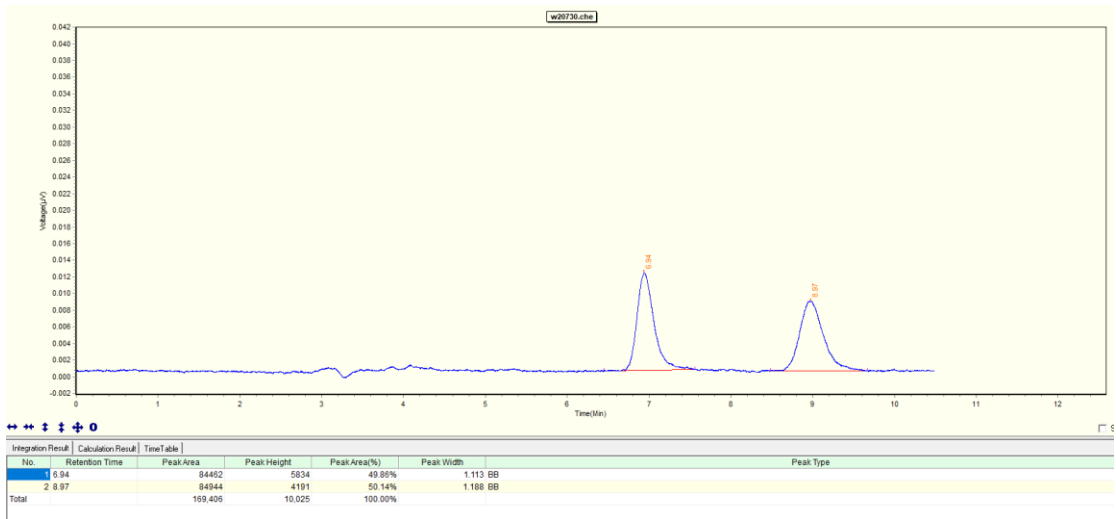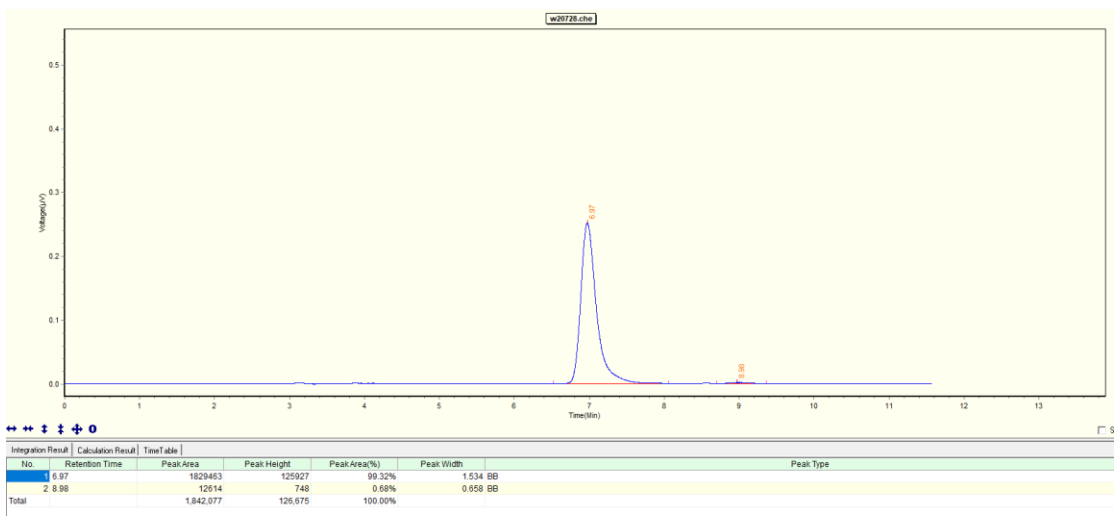

3i

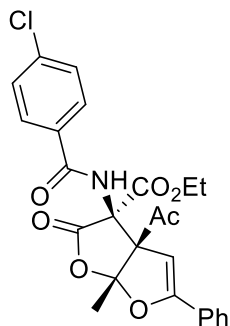

Before recrystallization

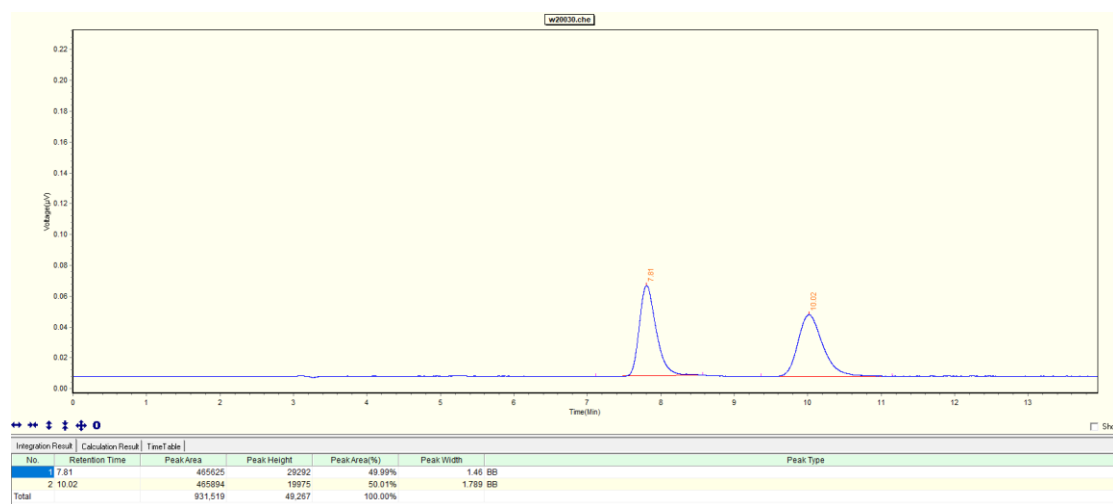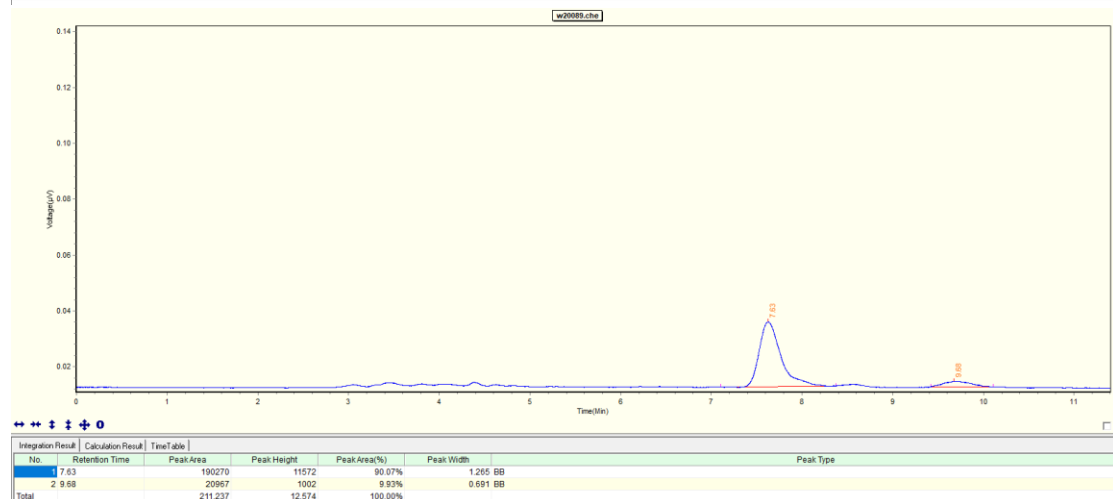

After recrystallization.

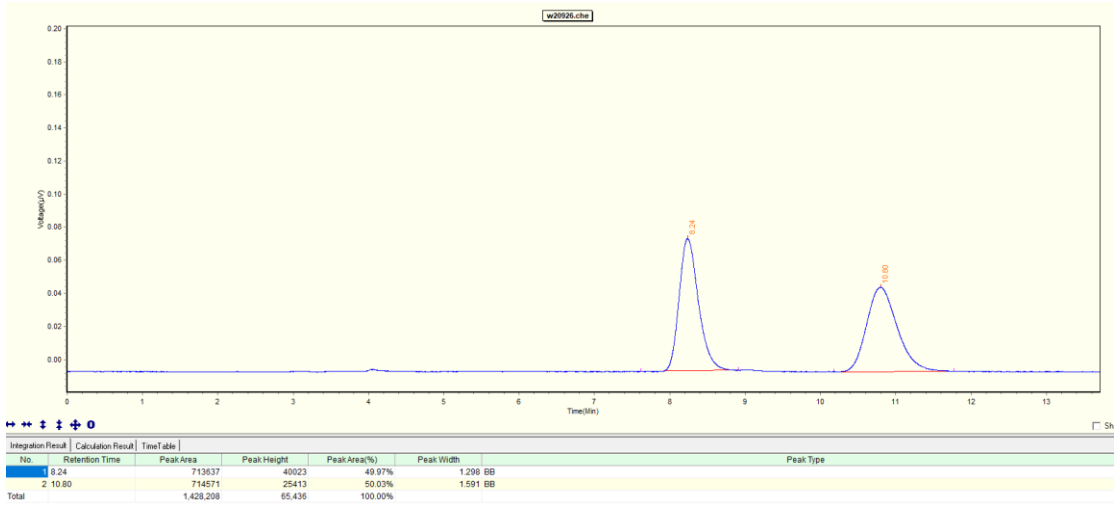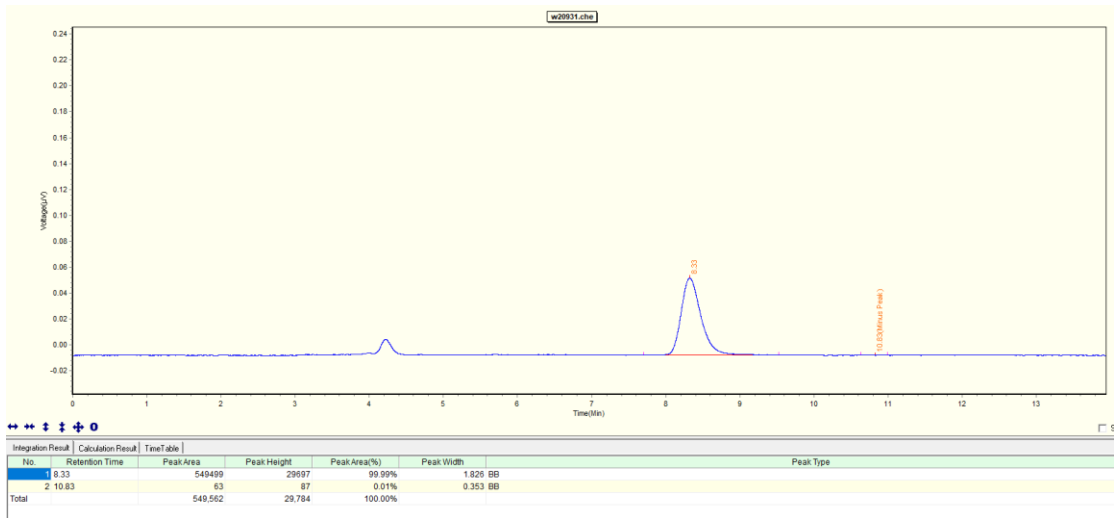

3j

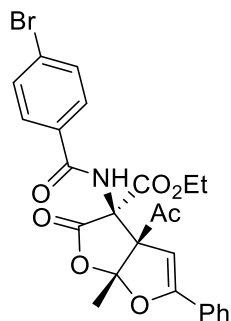

Before recrystallization

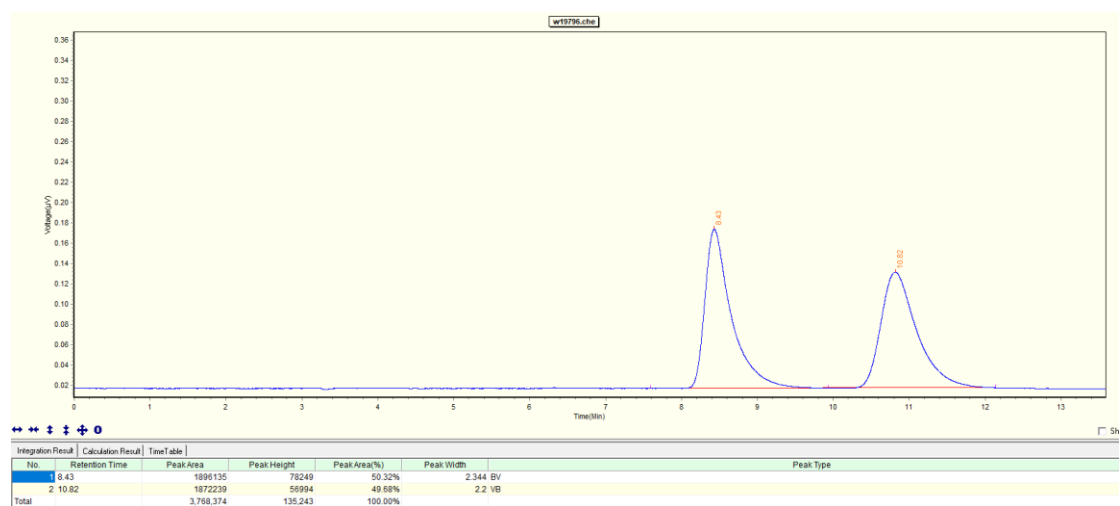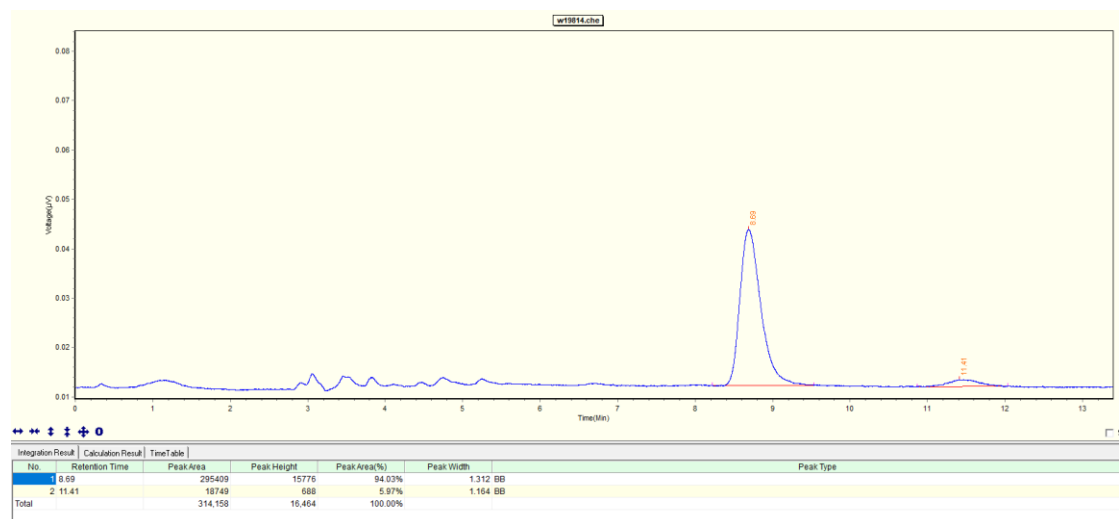

After recrystallization.

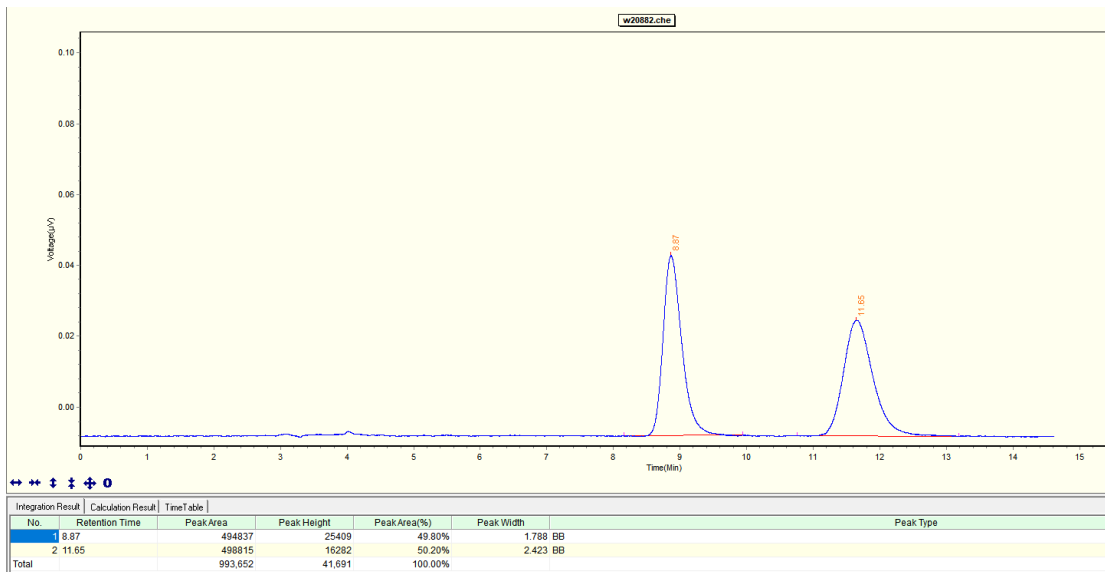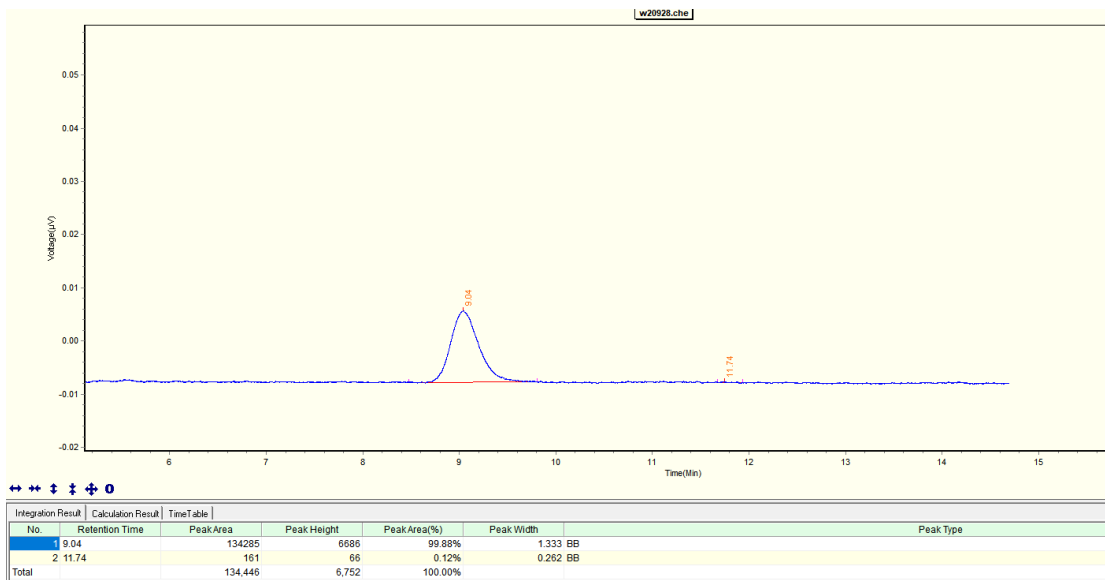

31

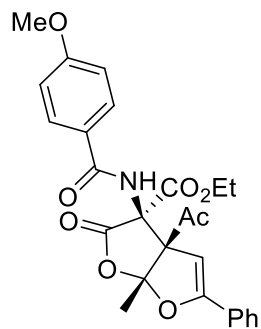

Before recrystallization:

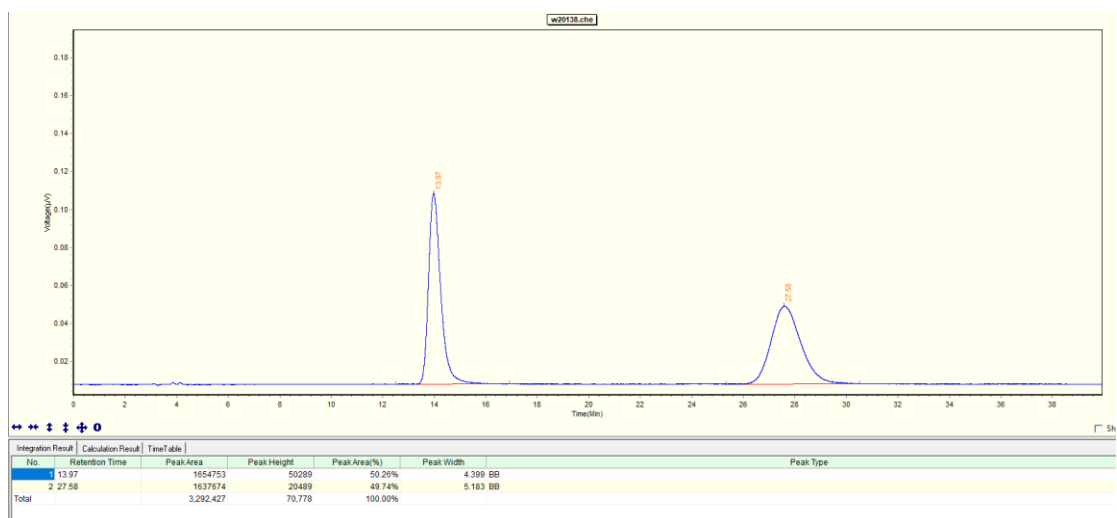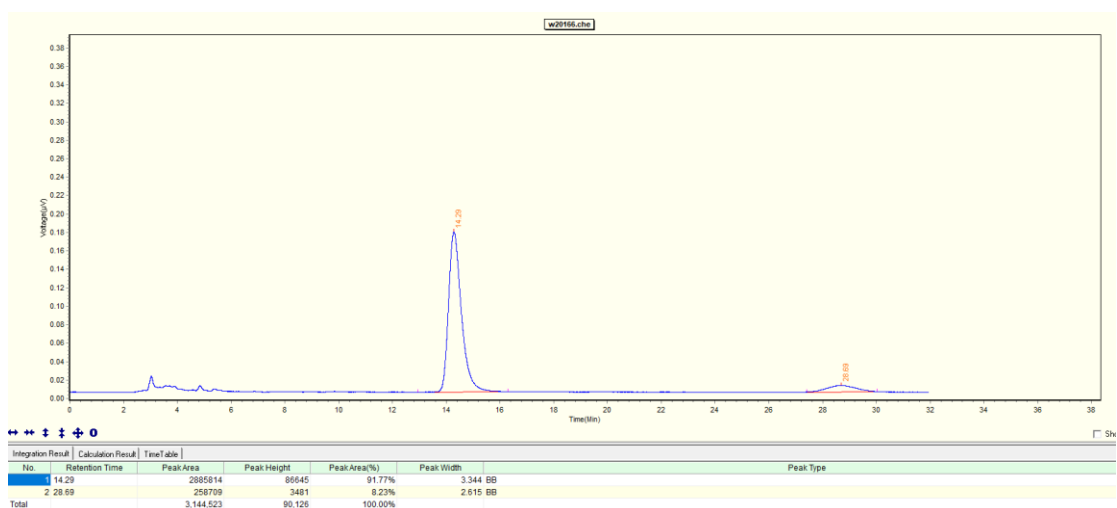

After recrystallization:

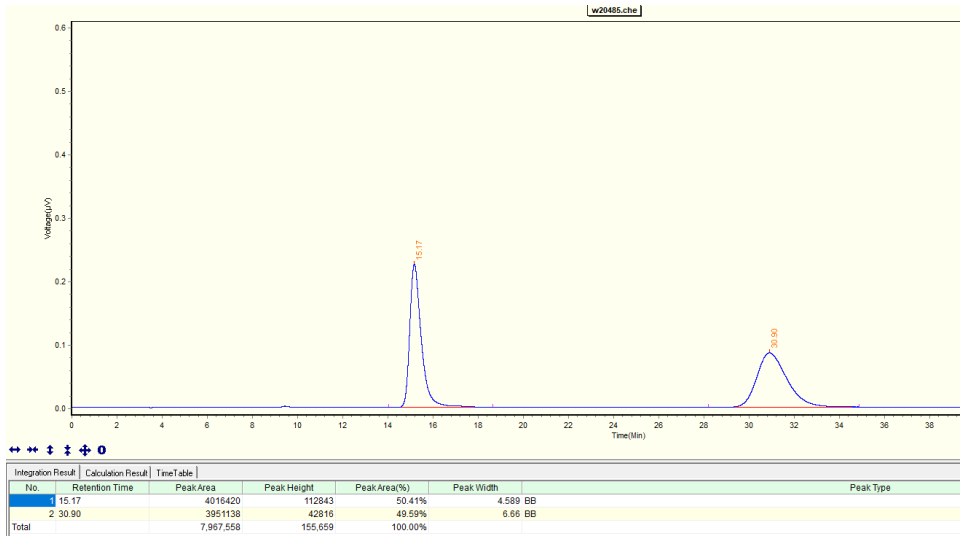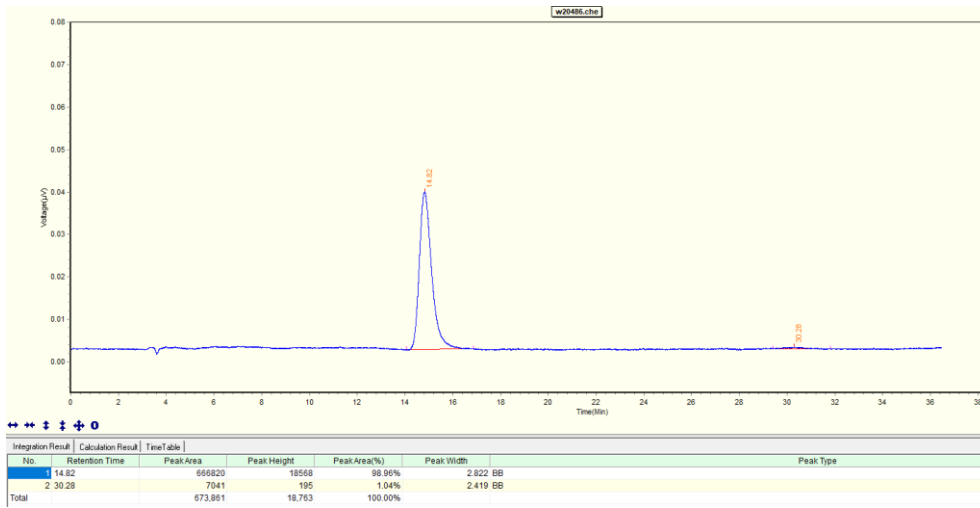

3n

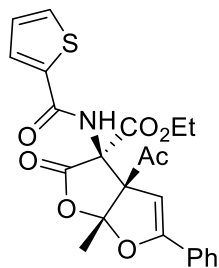

Before recrystallization:

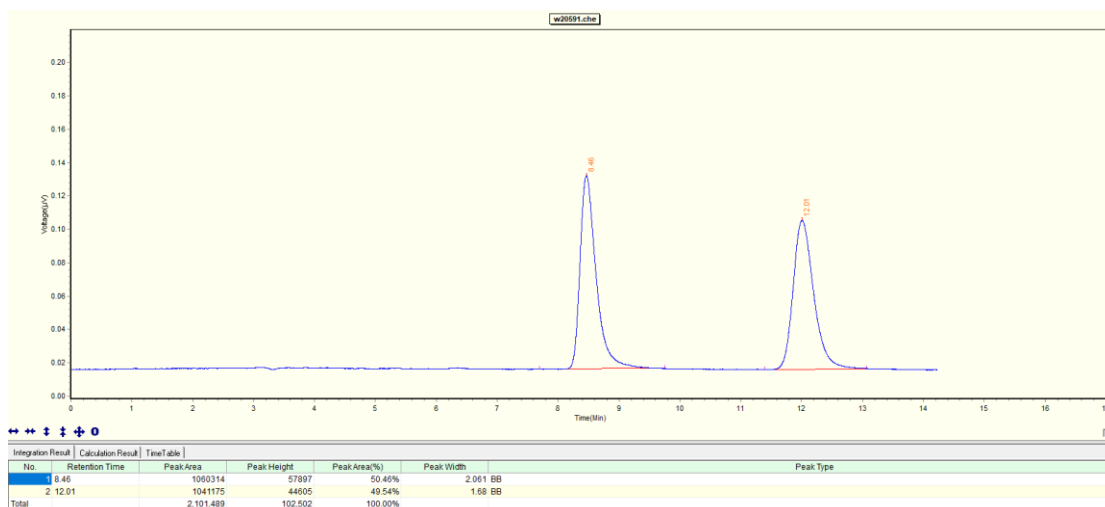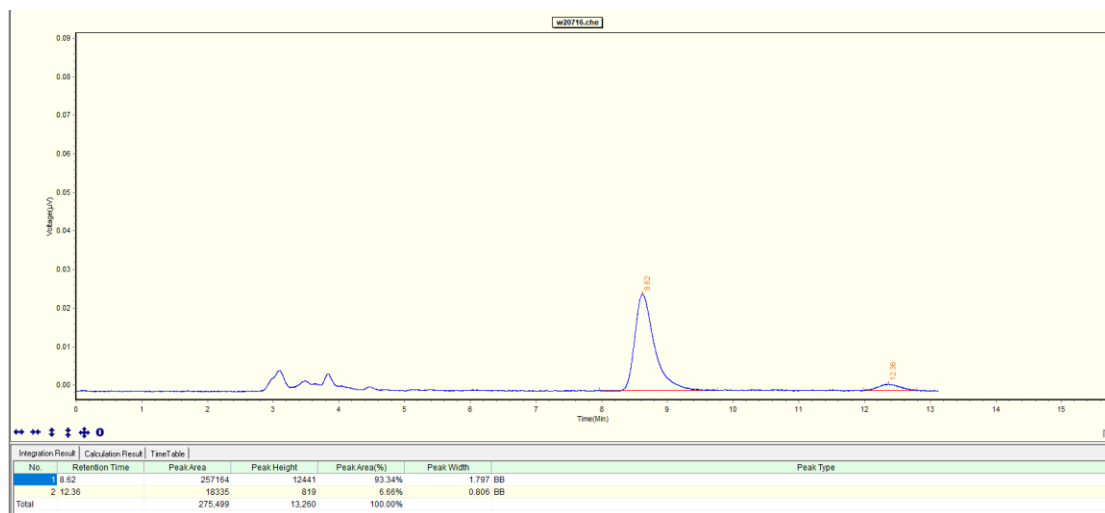



After recrystallization:

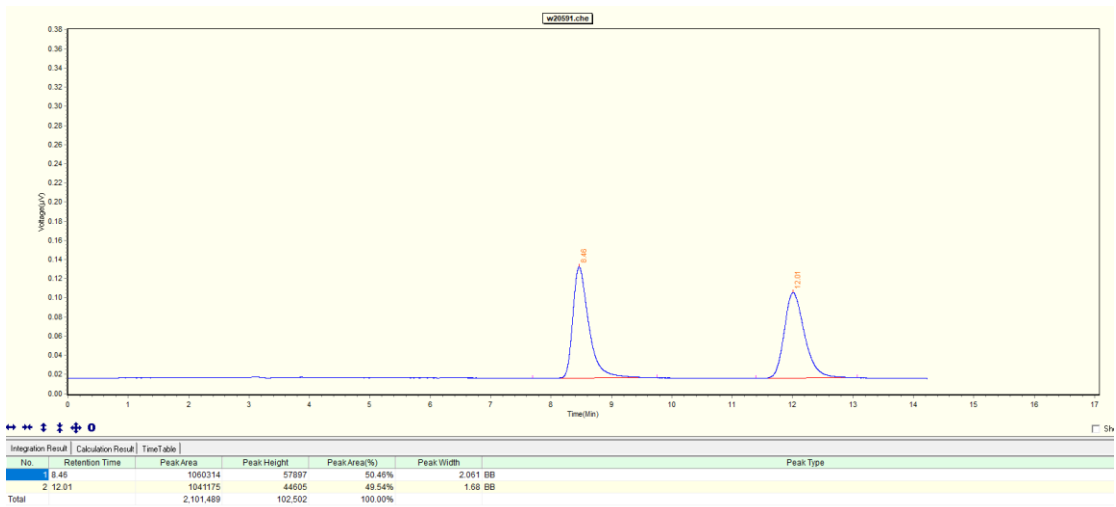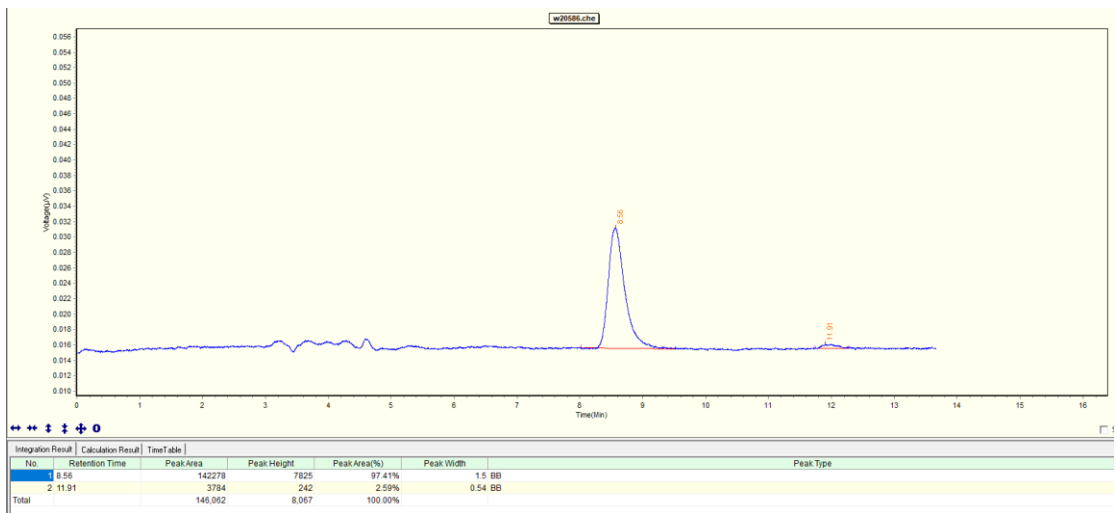

3s

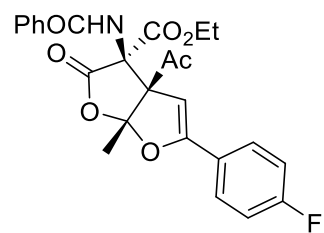

Before recrystallization:

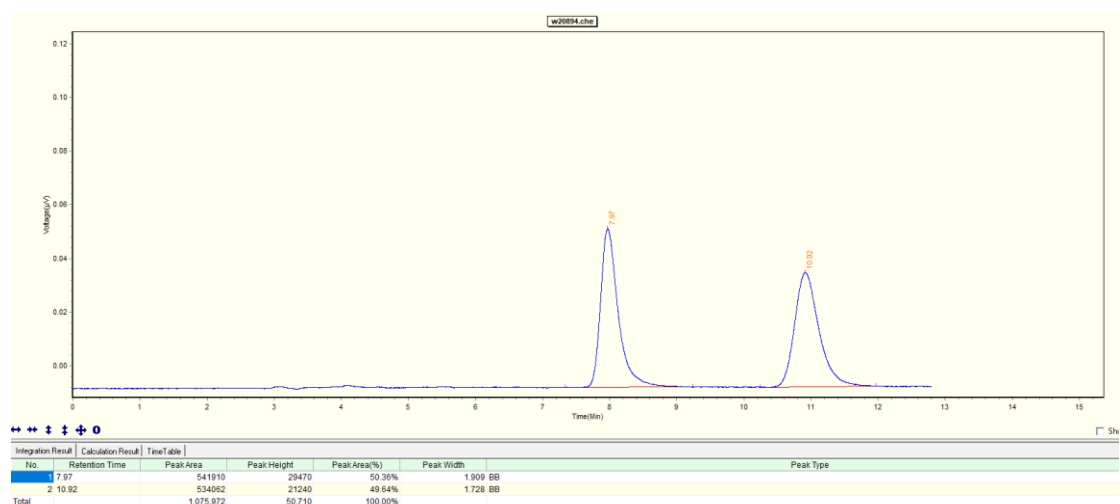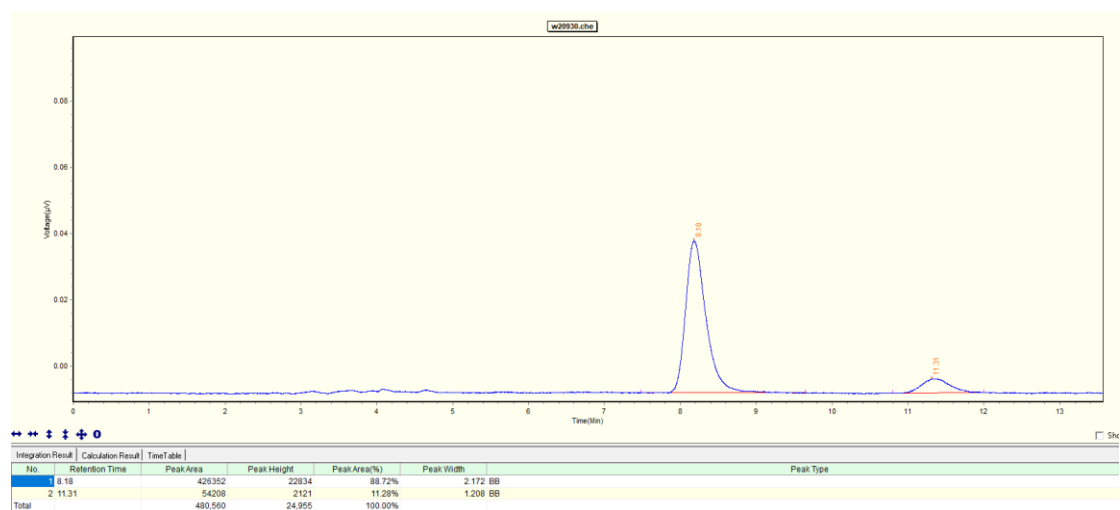

After recrystallization:

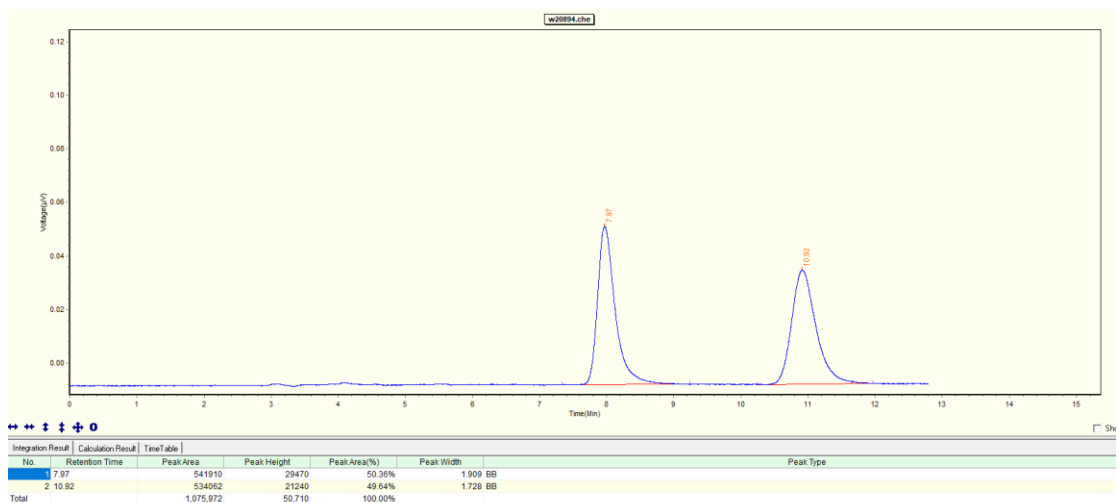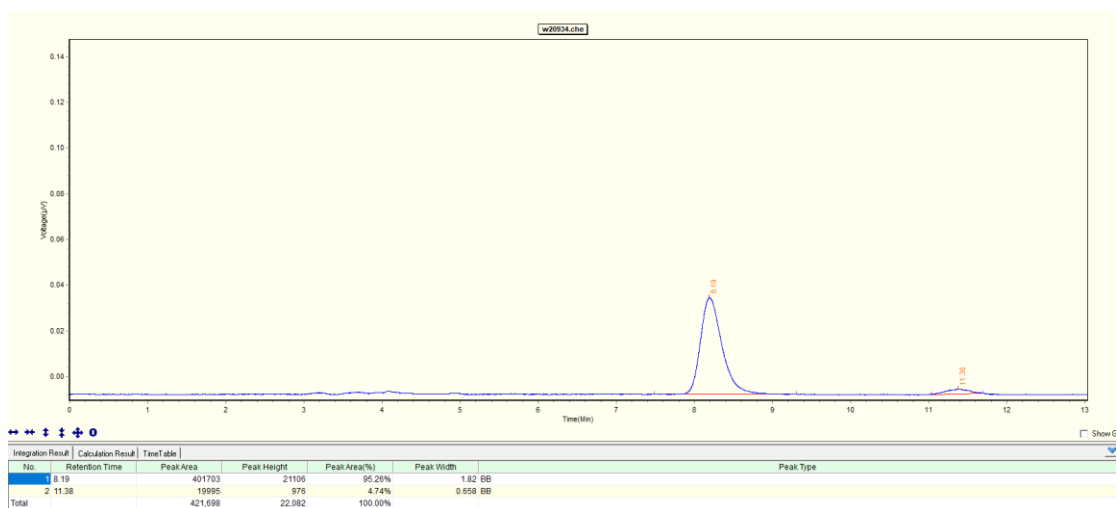

3t

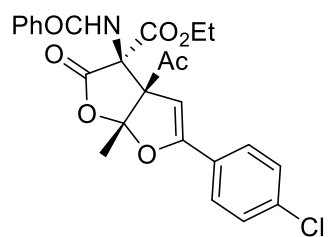

Before recrystallization

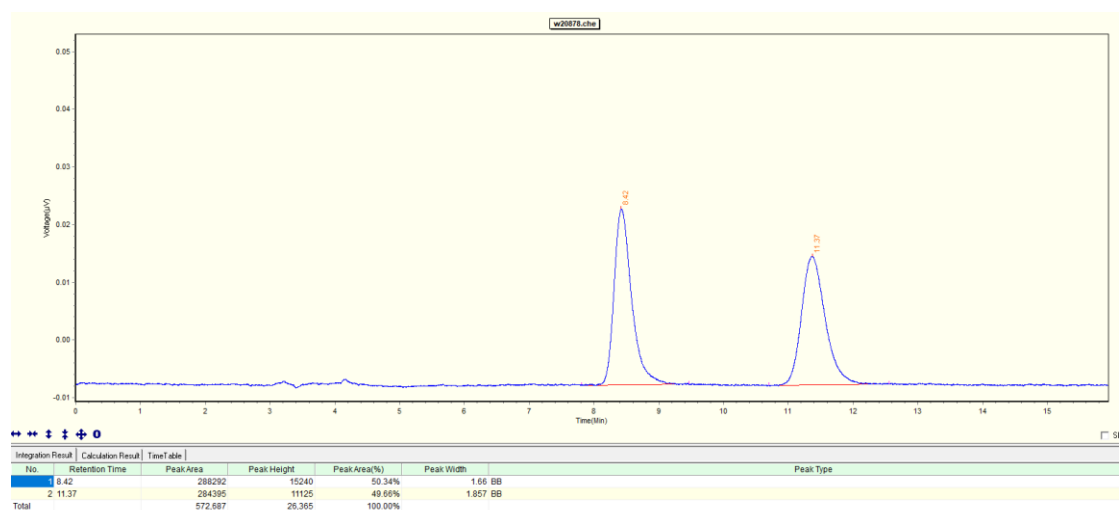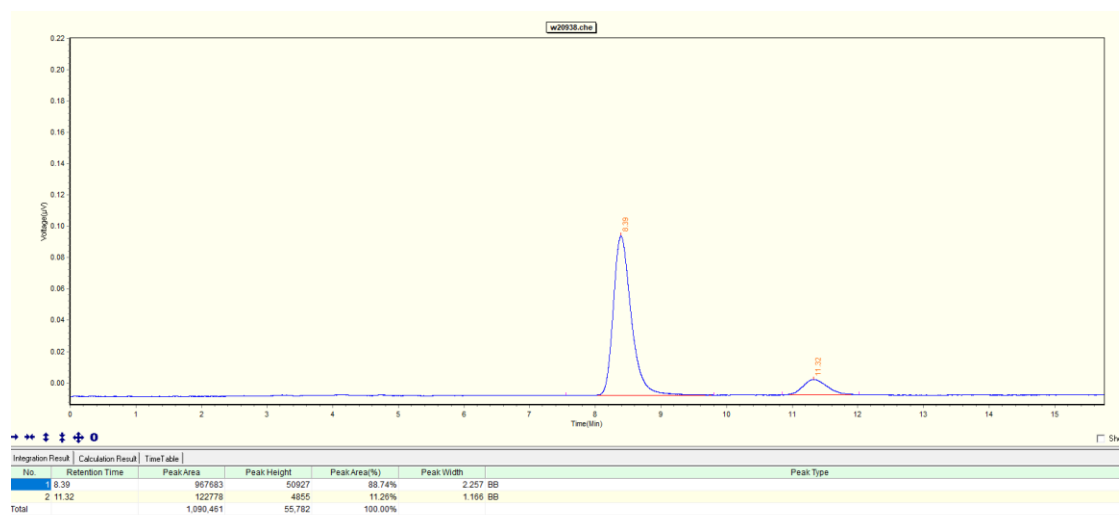

After recrystallization.

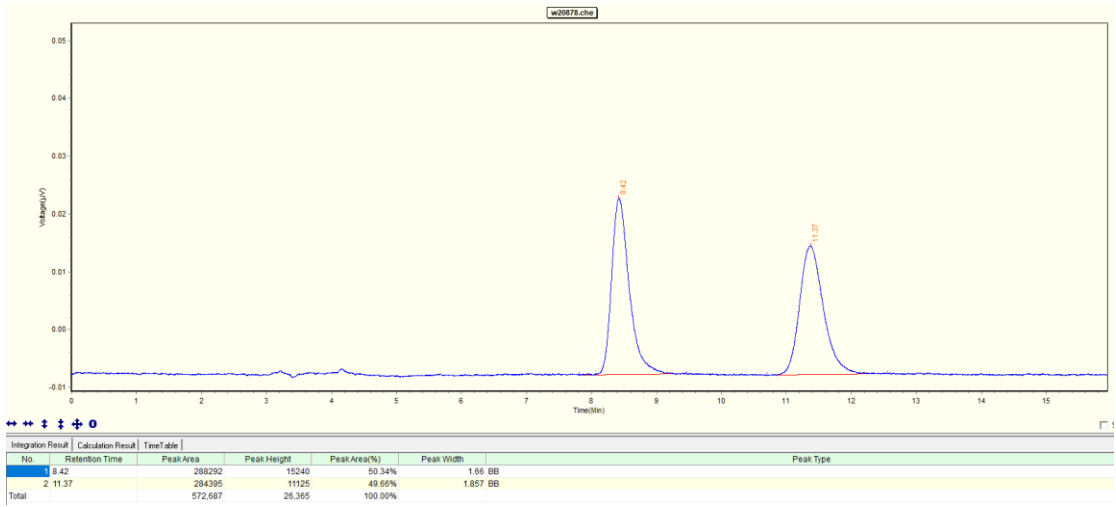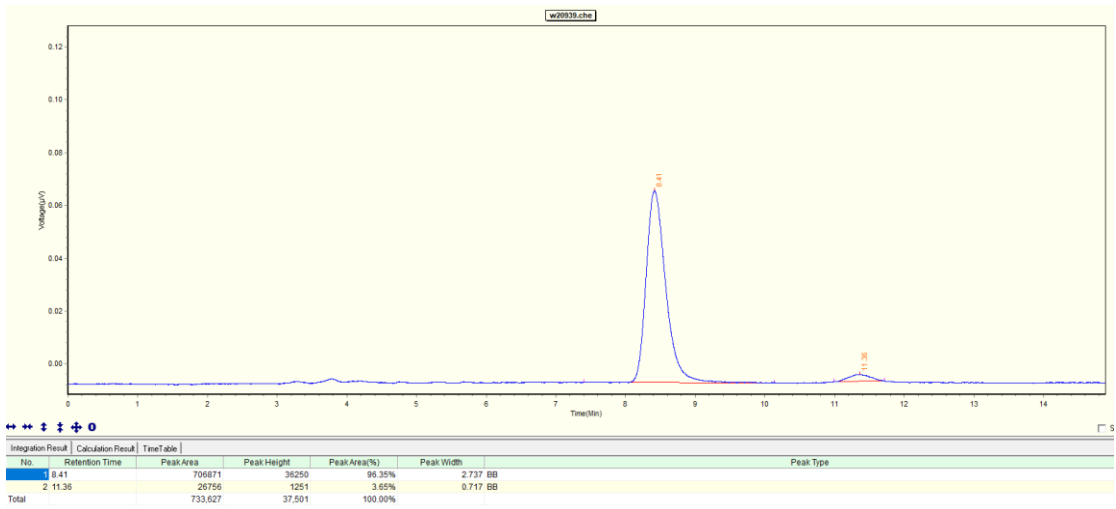

3u

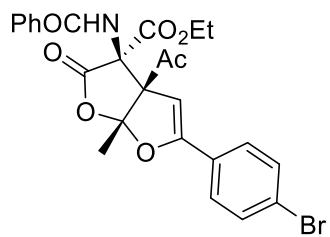

Before recrystallization

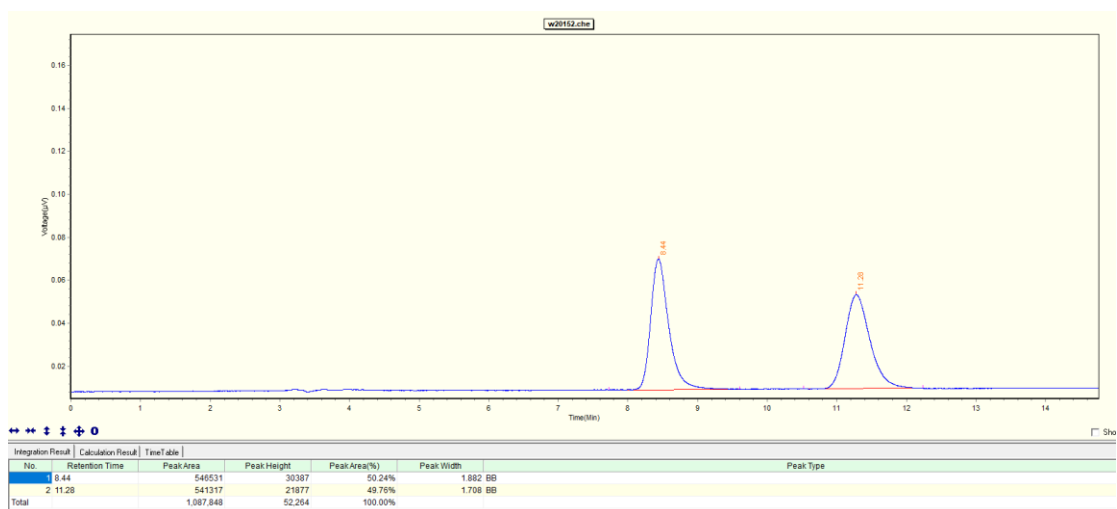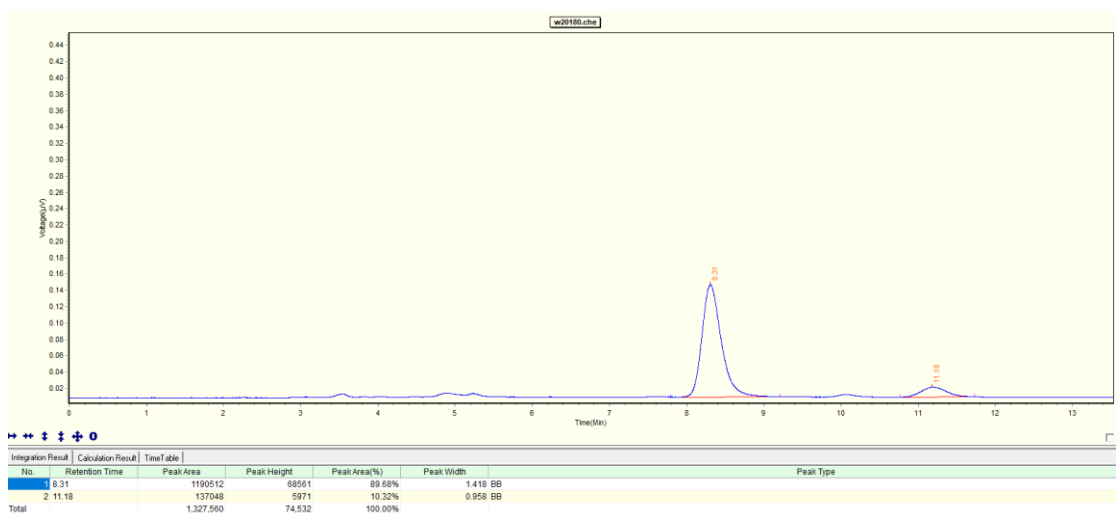

After recrystallization:

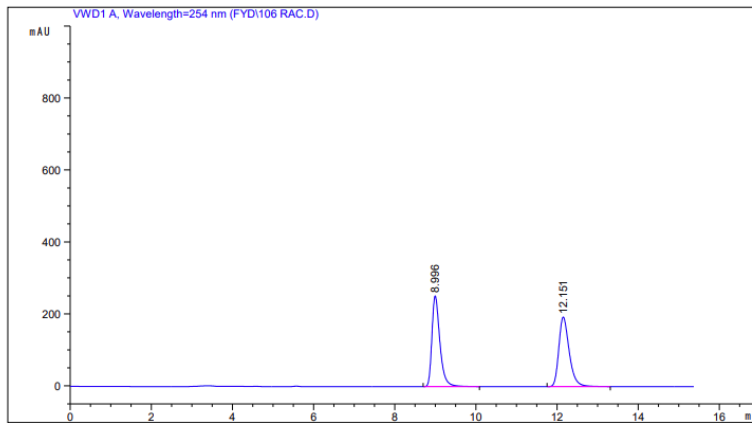

=====  
Area Percent Report  
=====

Sorted By : Signal  
Multiplier : 1.0000  
Dilution : 1.0000  
Use Multiplier & Dilution Factor with ISTDs

Signal 1: VWD1 A, Wavelength=254 nm

| Peak # | RetTime [min] | Type | Width [min] | Area mAU*s | Height [mAU] | Area %  |
|--------|---------------|------|-------------|------------|--------------|---------|
| 1      | 8.996         | BB   | 0.2080      | 3460.24634 | 252.32442    | 49.9926 |
| 2      | 12.151        | BB   | 0.2728      | 3461.26904 | 193.46725    | 50.0074 |

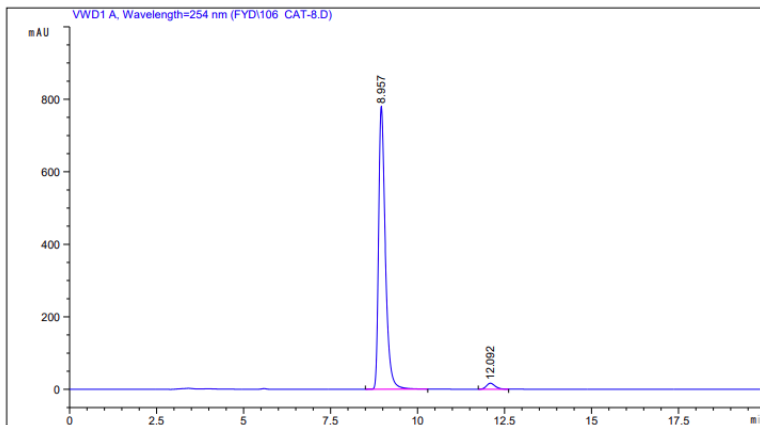

=====  
Area Percent Report  
=====

Sorted By : Signal  
Multiplier : 1.0000  
Dilution : 1.0000  
Use Multiplier & Dilution Factor with ISTDs

Signal 1: VWD1 A, Wavelength=254 nm

| Peak # | RetTime [min] | Type | Width [min] | Area mAU*s | Height [mAU] | Area %  |
|--------|---------------|------|-------------|------------|--------------|---------|
| 1      | 8.957         | BB   | 0.2040      | 1.05255e4  | 779.91101    | 97.2426 |
| 2      | 12.092        | BB   | 0.2716      | 298.45779  | 16.77649     | 2.7574  |

3w

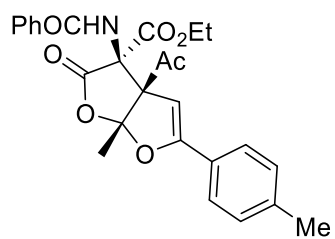

Before recrystallization:

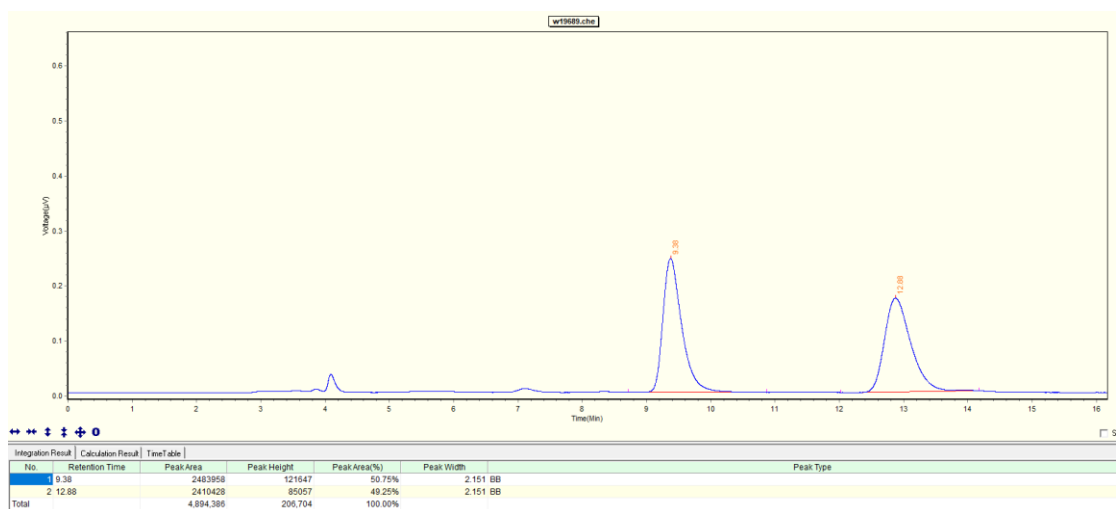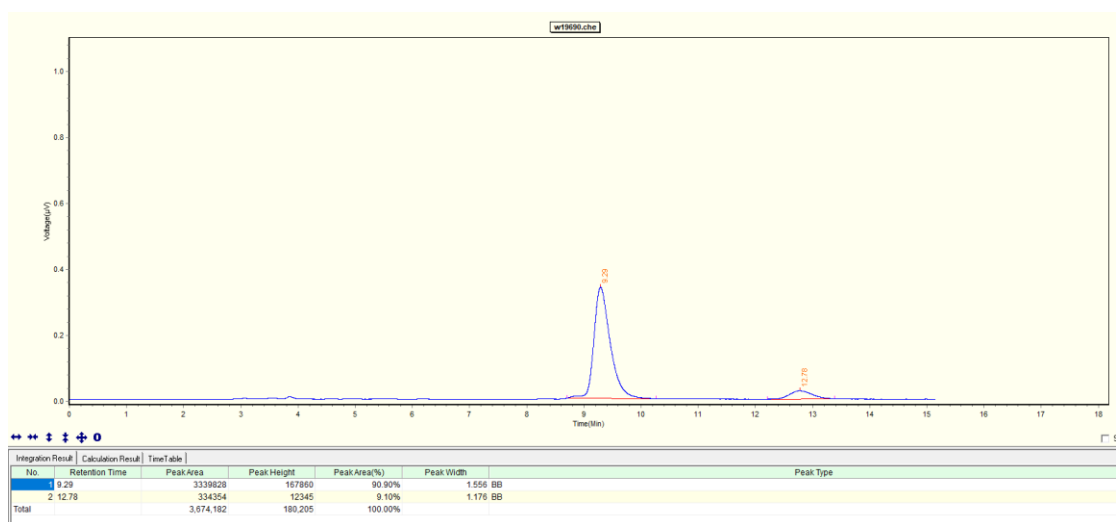



After recrystallization:

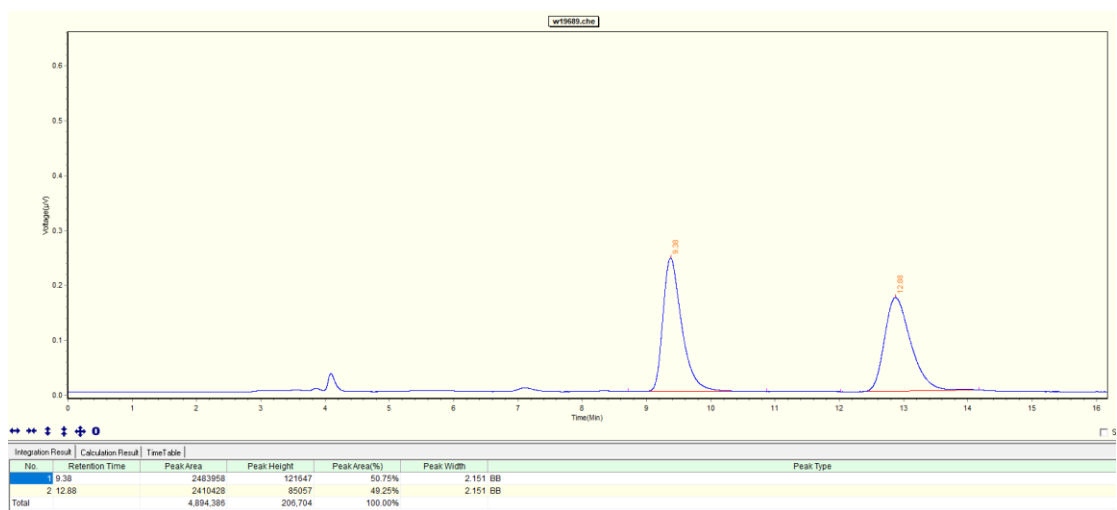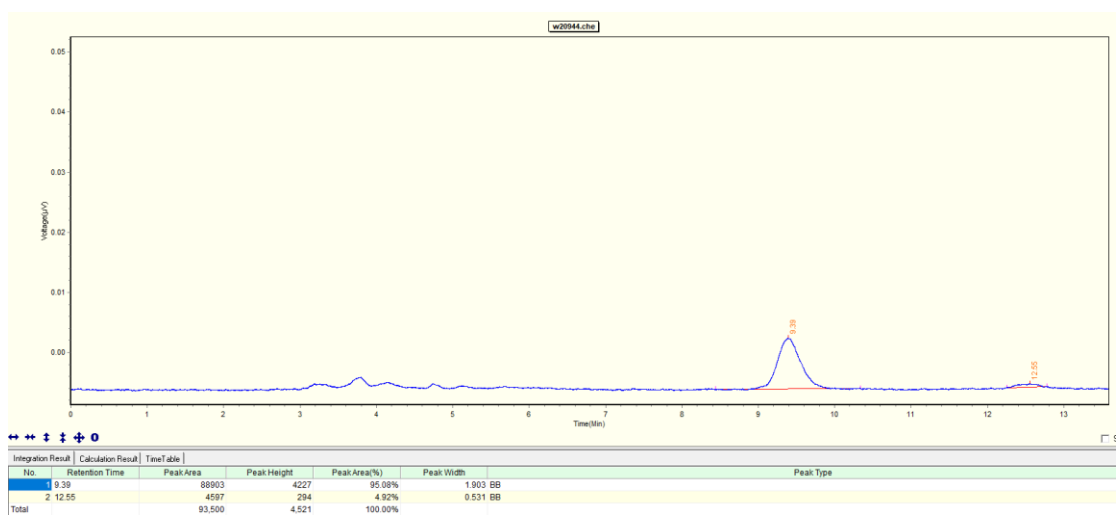

3y

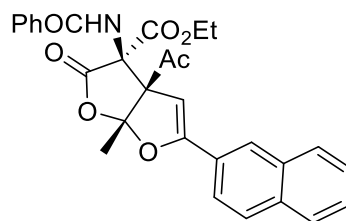

Before recrystallization:

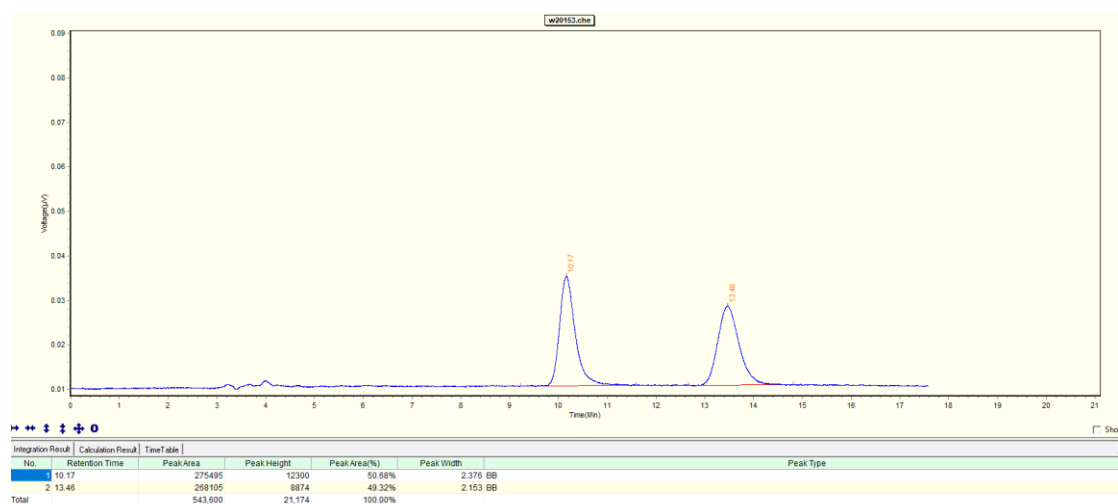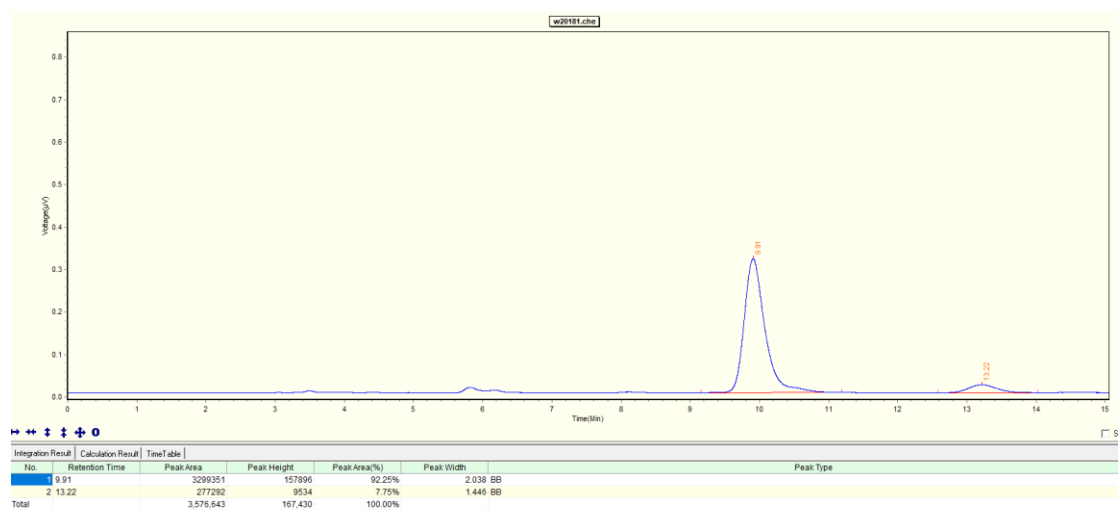

After recrystallization:

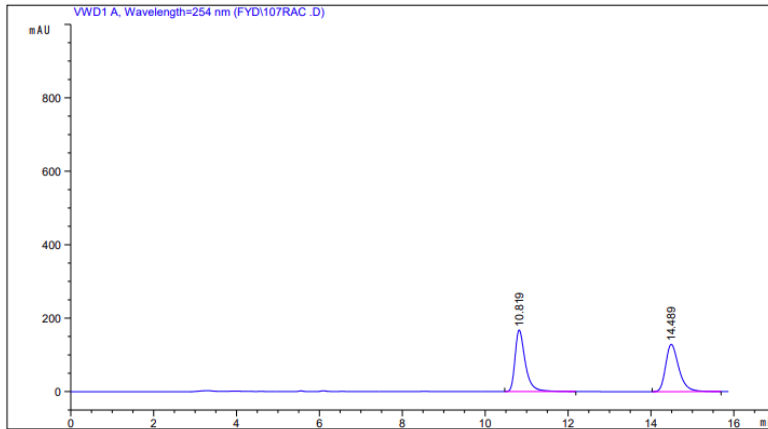

=====  
Area Percent Report  
=====

Sorted By : Signal  
Multiplier : 1.0000  
Dilution : 1.0000  
Use Multiplier & Dilution Factor with ISTDs

Signal 1: VWD1 A, Wavelength=254 nm

| Peak # | RetTime [min] | Type | Width [min] | Area mAU *s | Height [mAU] | Area %  |
|--------|---------------|------|-------------|-------------|--------------|---------|
| 1      | 10.819        | BB   | 0.2581      | 2869.20801  | 167.49533    | 50.1753 |
| 2      | 14.489        | BB   | 0.3366      | 2849.15381  | 128.87137    | 49.8247 |

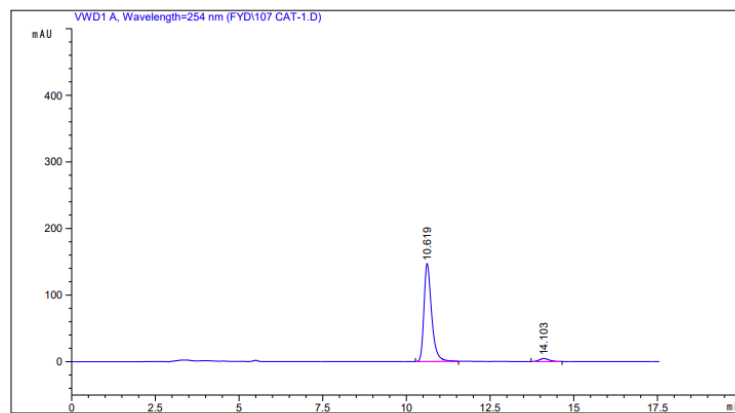

=====  
Area Percent Report  
=====

Sorted By : Signal  
Multiplier : 1.0000  
Dilution : 1.0000  
Use Multiplier & Dilution Factor with ISTDs

Signal 1: VWD1 A, Wavelength=254 nm

| Peak # | RetTime [min] | Type | Width [min] | Area mAU *s | Height [mAU] | Area %  |
|--------|---------------|------|-------------|-------------|--------------|---------|
| 1      | 10.619        | BB   | 0.2427      | 2344.58447  | 147.13242    | 96.2266 |
| 2      | 14.103        | BB   | 0.3116      | 91.94094    | 4.51924      | 3.7734  |

## 8. References

1. M. Gao, Y. Yang, Y.-D. Wu, C. Deng, L.-P. Cao, X.-G. Meng, A.-X. Wu, *Org. Lett.*, **2010**, 12, 1856-1859.
2. X. P. Chen, J. X. Liu, H. Y. Li, Y. C. Xiao, F. E. Chen, *Adv. Synth. Catal.*, **2022**, 364 (12), 2067-2071.
- 3 R. A. Mosey, J. S. Fisk, T. L. Friebe, J. J. Tepe, *J. Org. Lett.*, **2008**, 10 (5), 825-828.
